# Supplementary material for: Molecular portrait of cisplatin induced response in human testis cancer cell lines based on gene expression profiles
Source: PubMed Central journal article supplement (PMC1988831; doi:10.1186/1476-4598-6-53), 2007-08-21

**Additional file 1:** Significance Analysis of Microarrays (SAM) comparing TGCT cell lines versus HCT116 cell lines following cisplatin exposure. The positive significant genes (n=1180, red) are most highly expressed in TGCT cells, whereas the negative significant genes (n=614, green) are most highly expressed in HCT116 cells.

Current settings

Input parameters

|                                                |                    |
|------------------------------------------------|--------------------|
| Data type?                                     | Two class unpaired |
| Arrays centered?                               | SANN               |
| Delta                                          | 3,833              |
| Minimum fold change                            | 2                  |
| Test statistic                                 | standard           |
| Are data are log scale?                        | SANN               |
| Number of permutations                         | 300                |
| Input percentile for exchangeability factor s0 | Automatic choice   |
| Number of neighbors for KNN                    | 10                 |
| Seed for Random number generator               | 1234567            |

Computed values

|                                            |             |
|--------------------------------------------|-------------|
| Estimate of pi0 (proportion of null genes) | 0.217329187 |
| Exchangeability factor s0                  | 0.090835634 |
| s0 percentile                              | 5.000420203 |
| False Discovery Rate (%)                   | 0           |

List of Significant Genes for Delta = 3,833

| Positive genes (1180) |            |                           |            |              |                   |             |            |
|-----------------------|------------|---------------------------|------------|--------------|-------------------|-------------|------------|
| Row                   | Gene ID    | Gene Name                 | Score(d)   | Numerator(r) | Denominator(s+s0) | Fold Change | q-value(%) |
| 393                   | H200000451 | <a href="#">IL1A</a>      | 8,62139647 | 2,98623989   | 0,34637543        | 7,65955067  | 0          |
| 10320                 | H200016886 | <a href="#">EXOC6</a>     | 8,35666073 | 4,06656637   | 0,48662576        | 19,04075871 | 0          |
| 9563                  | H200015045 | <a href="#">FYN</a>       | 8,22642512 | 4,46694508   | 0,54299954        | 24,36684315 | 0          |
| 5433                  | H200007237 | <a href="#">ANGEL2</a>    | 8,12650564 | 1,81566189   | 0,22342468        | 3,51381061  | 0          |
| 10679                 | H200017770 | <a href="#">BCL2L10</a>   | 8,02743954 | 4,33229868   | 0,53968624        | 21,88783387 | 0          |
| 10712                 | H200017833 | <a href="#">ASCL3</a>     | 7,98473220 | 3,08388191   | 0,38622233        | 8,81467983  | 0          |
| 8232                  | H200012226 | <a href="#">PCDHB5</a>    | 7,91814462 | 3,77319780   | 0,47652550        | 12,80515004 | 0          |
| 6945                  | H200010040 | <a href="#">LOC283075</a> | 7,85855289 | 5,22327716   | 0,66466145        | 33,81514721 | 0          |
| 10866                 | H200018251 | <a href="#">ROCK1</a>     | 7,83219174 | 4,51109817   | 0,57596881        | 22,14185962 | 0          |
| 10868                 | H200018257 | <a href="#">USP6NL</a>    | 7,80222454 | 2,62475216   | 0,33641074        | 5,99329996  | 0          |
| 11200                 | H200019213 | <a href="#">GPC5</a>      | 7,79792648 | 3,96120400   | 0,50798171        | 17,06471773 | 0          |
| 10924                 | H200018507 | <a href="#">NF1</a>       | 7,76612689 | 4,05201245   | 0,52175460        | 16,80132190 | 0          |
| 10911                 | H200018441 | <a href="#">PIK3C3</a>    | 7,76392043 | 4,05633717   | 0,52245991        | 17,73388510 | 0          |
| 8431                  | H200012718 | <a href="#">HDGFRP3</a>   | 7,71835198 | 2,86996055   | 0,37183592        | 7,32654443  | 0          |
| 10915                 | H200018453 | <a href="#">VPS54</a>     | 7,70773862 | 4,39217989   | 0,56984027        | 21,57955167 | 0          |
| 7139                  | H200010383 | <a href="#">CXCL5</a>     | 7,70547588 | 3,69052190   | 0,47894795        | 12,42466407 | 0          |
| 11284                 | H200019433 | <a href="#">FANCE</a>     | 7,64798451 | 4,24088489   | 0,55451013        | 18,82838098 | 0          |
| 9635                  | H200015192 | <a href="#">SLC25A36</a>  | 7,60620096 | 1,94589462   | 0,25583003        | 3,80433817  | 0          |
| 8589                  | H200013085 | <a href="#">LOC730245</a> | 7,60562374 | 4,54066348   | 0,59701395        | 21,56735421 | 0          |
| 10869                 | H200018262 | <a href="#">NAV3</a>      | 7,60357987 | 3,93242668   | 0,51718095        | 14,93081504 | 0          |
| 9740                  | H200015431 | <a href="#">PCDHB9</a>    | 7,59725985 | 3,66289543   | 0,48213376        | 12,61150220 | 0          |
| 10833                 | H200018186 | <a href="#">PRDM5</a>     | 7,59306860 | 3,85580601   | 0,50780603        | 14,46559691 | 0          |
| 10559                 | H200017495 | <a href="#">PCNXL2</a>    | 7,57446409 | 4,40699444   | 0,58182261        | 20,42558634 | 0          |
| 8425                  | H200012700 | <a href="#">DNAH5</a>     | 7,57093380 | 4,28320055   | 0,56574270        | 20,75923446 | 0          |
| 11248                 | H200019349 | <a href="#">FTHL17</a>    | 7,56644343 | 4,36069802   | 0,57632071        | 19,99203391 | 0          |
| 10884                 | H200018324 | <a href="#">SLC39A3</a>   | 7,54054726 | 3,13887289   | 0,41626593        | 8,84109165  | 0          |
| 10990                 | H200018768 | <a href="#">ZNF33A</a>    | 7,46737802 | 3,24214968   | 0,43417511        | 9,63485952  | 0          |
| 1125                  | H200001343 | <a href="#">TMEM55B</a>   | 7,44373914 | 3,95900683   | 0,53185728        | 16,24584612 | 0          |
| 8376                  | H200012576 | <a href="#">KERA</a>      | 7,40548783 | 5,04824581   | 0,68168984        | 25,32584878 | 0          |
| 9370                  | H200014639 | <a href="#">CLCA1</a>     | 7,37410182 | 2,00584456   | 0,27201205        | 3,96736479  | 0          |
| 8845                  | H200013701 | <a href="#">ZFP37</a>     | 7,33307229 | 4,04206958   | 0,55121093        | 15,57528282 | 0          |
| 7807                  | H200011536 | <a href="#">CLSTN3</a>    | 7,31392260 | 3,01271485   | 0,41191506        | 7,68508615  | 0          |
| 10640                 | H200017622 | <a href="#">FLJ13611</a>  | 7,26907573 | 3,27616968   | 0,45069962        | 11,32961233 | 0          |
| 11826                 | H200021171 | <a href="#">LOC254100</a> | 7,26081174 | 3,71954604   | 0,51227689        | 14,17677361 | 0          |
| 11287                 | H200019440 | <a href="#">MAML2</a>     | 7,25838631 | 3,81307262   | 0,52533338        | 13,99887533 | 0          |
| 10571                 | H200017515 | <a href="#">PRKCA</a>     | 7,22974942 | 3,15716813   | 0,43669122        | 9,29189965  | 0          |
| 10306                 | H200016786 | <a href="#">DMXL2</a>     | 7,21023568 | 3,96222959   | 0,54952844        | 14,59730406 | 0          |
| 10809                 | H200018136 | <a href="#">DEPDC1B</a>   | 7,19600699 | 3,68775098   | 0,51247185        | 12,76104316 | 0          |
| 10392                 | H200017105 | <a href="#">OR12D3</a>    | 7,19567219 | 4,62216375   | 0,64235330        | 22,12907991 | 0          |
| 2946                  | H200003793 | <a href="#">ZNF488</a>    | 7,19238673 | 3,17361264   | 0,44124611        | 8,71168703  | 0          |
| 10129                 | H200016423 | <a href="#">SLC30A6</a>   | 7,18468897 | 4,91813398   | 0,68452984        | 24,69298915 | 0          |
| 2605                  | H200003326 | <a href="#">CHFR</a>      | 7,17393312 | 2,83428679   | 0,39508130        | 6,38636913  | 0          |
| 6473                  | H200008941 | <a href="#">MEGF10</a>    | 7,16479623 | 3,76077210   | 0,52489589        | 13,77831372 | 0          |
| 8578                  | H200013051 | <a href="#">PCDH20</a>    | 7,14399206 | 4,63414870   | 0,64867775        | 20,82750540 | 0          |
| 10795                 | H200018097 | <a href="#">NRIP1</a>     | 7,14023776 | 4,42379568   | 0,61955860        | 25,40208636 | 0          |
| 10785                 | H200018031 | <a href="#">LOC130951</a> | 7,13719863 | 2,99421676   | 0,41952269        | 7,57039940  | 0          |
| 11106                 | H200019053 | <a href="#">SLC30A6</a>   | 7,11128320 | 2,44676407   | 0,34406787        | 5,46588925  | 0          |
| 11428                 | H200019841 | <a href="#">PDE3B</a>     | 7,09185045 | 4,18881555   | 0,59065199        | 19,10275328 | 0          |

|       |            |             |            |            |            |             |   |
|-------|------------|-------------|------------|------------|------------|-------------|---|
| 8744  | H200013452 | PIP5K2C     | 7.07144778 | 2.39514141 | 0.33870595 | 5.05054362  | 0 |
| 10742 | H200017925 | USP3        | 7.06738961 | 3.54130548 | 0.50107687 | 11.85164833 | 0 |
| 6666  | H200009436 | POM121      | 7.05830185 | 2.31148041 | 0.32748393 | 4.63241589  | 0 |
| 11189 | H200019178 | AKT2        | 7.03466729 | 3.10356331 | 0.44118125 | 8.82652181  | 0 |
| 11322 | H200019516 | PMS2L1      | 7.03293686 | 3.37909432 | 0.48046703 | 11.51304634 | 0 |
| 3101  | H200004001 | SENP7       | 7.02577838 | 3.74436166 | 0.53294617 | 13.58327847 | 0 |
| 9411  | H200014717 | C14orf118   | 7.02458407 | 2.54429458 | 0.36219861 | 5.67360027  | 0 |
| 7797  | H200011524 | DDIT4L      | 7.00946798 | 3.68090465 | 0.52513324 | 12.18030618 | 0 |
| 2555  | H200003246 | VGLL3       | 6.99883326 | 3.49545728 | 0.49943428 | 11.26757818 | 0 |
| 11183 | H200019166 | LOC92482    | 6.99541982 | 3.69661036 | 0.52843295 | 14.90055328 | 0 |
| 9221  | H200014303 | PCMTD2      | 6.99364500 | 2.55279927 | 0.36501699 | 5.81474069  | 0 |
| 484   | H200000566 | CSN2        | 6.98686784 | 3.22394282 | 0.46142891 | 9.97621782  | 0 |
| 8821  | H200013651 | ATPBD4      | 6.98517657 | 3.42963244 | 0.49098722 | 10.26498810 | 0 |
| 7765  | H200011475 | RPL1-35N6.1 | 6.98131821 | 4.82880949 | 0.69167589 | 24.42534830 | 0 |
| 8545  | H200012984 | RPL24       | 6.96875598 | 3.04668736 | 0.43719243 | 7.79873682  | 0 |
| 3111  | H200004015 | ZNF451      | 6.95062908 | 3.36909544 | 0.48471806 | 10.06139593 | 0 |
| 8032  | H200011892 | SH3MD4      | 6.93403757 | 3.65207098 | 0.52668751 | 13.47731844 | 0 |
| 7228  | H200010523 | WNT10B      | 6.92923526 | 1.89480069 | 0.27345019 | 3.72544351  | 0 |
| 10885 | H200018326 | IBTK        | 6.91423499 | 4.76531419 | 0.68920339 | 22.07313134 | 0 |
| 11233 | H200019326 | BTBD10      | 6.88657542 | 2.45353518 | 0.35627798 | 5.20640502  | 0 |
| 11719 | H200020780 | C17orf77    | 6.87215102 | 4.43228239 | 0.64496289 | 19.71142175 | 0 |
| 10982 | H200018722 | KRTAP4-14   | 6.87079327 | 4.01150558 | 0.58384897 | 15.95092023 | 0 |
| 11320 | H200019513 | PSG11       | 6.86778773 | 3.59414718 | 0.52333405 | 12.59786024 | 0 |
| 10902 | H200018381 | DKFZp667M2  | 6.86350091 | 4.27899148 | 0.62344153 | 17.60153116 | 0 |
| 8428  | H200012710 | DLL3        | 6.86278695 | 2.10247219 | 0.30635837 | 4.21249812  | 0 |
| 10737 | H200017913 | FAM91A1     | 6.84624209 | 3.21330536 | 0.46935316 | 9.56182685  | 0 |
| 11318 | H200019509 | BEX1        | 6.84254234 | 3.32068824 | 0.48530036 | 9.69962381  | 0 |
| 8745  | H200013453 | LOC727846   | 6.82598572 | 3.07345785 | 0.45025846 | 8.44216603  | 0 |
| 11067 | H200018986 | JMJD1A      | 6.81965651 | 2.62153174 | 0.38440818 | 6.15307610  | 0 |
| 11806 | H200021089 | TMEM25      | 6.81820119 | 3.13197268 | 0.45935469 | 9.51217202  | 0 |
| 1034  | H200001225 | C14orf132   | 6.80588498 | 2.89567344 | 0.42546611 | 7.44386716  | 0 |
| 11570 | H200020254 | SYNC1       | 6.80186892 | 3.44942803 | 0.50712945 | 11.24464886 | 0 |
| 10714 | H200017855 | ATBF1       | 6.78036933 | 2.99910704 | 0.44232208 | 8.28476517  | 0 |
| 9311  | H200014481 | SNX12       | 6.77272609 | 3.38514980 | 0.49982086 | 11.08084099 | 0 |
| 10429 | H200017217 | KCNMB3      | 6.76160521 | 2.72214528 | 0.40258862 | 6.29941349  | 0 |
| 10873 | H200018274 | UBE2D3      | 6.75485018 | 3.16236601 | 0.46816227 | 8.73885213  | 0 |
| 11771 | H200020995 | SKP1A       | 6.72633045 | 2.54862496 | 0.37890273 | 6.52028388  | 0 |
| 11739 | H200020866 | TFE3        | 6.72115666 | 4.11580497 | 0.61236558 | 16.17294292 | 0 |
| 9105  | H200014096 | FOXF1       | 6.72011862 | 4.15387550 | 0.61812532 | 16.16939084 | 0 |
| 10980 | H200018719 | KRTAP4-14   | 6.70636654 | 4.09208487 | 0.61017913 | 15.90353685 | 0 |
| 10336 | H200016939 | SYNE1       | 6.70454534 | 2.43149485 | 0.36266364 | 5.39768644  | 0 |
| 10175 | H200016522 | PLGLB2      | 6.69291189 | 3.60082993 | 0.53800647 | 13.18347687 | 0 |
| 923   | H200001085 | PSMD9       | 6.68699734 | 1.87408744 | 0.28025844 | 3.49131472  | 0 |
| 6832  | H200009778 | DEPDC6      | 6.67993687 | 3.70793318 | 0.55508506 | 13.44319911 | 0 |
| 11052 | H200018945 | ZF          | 6.67600951 | 3.16423099 | 0.47397041 | 9.34646796  | 0 |
| 7586  | H200011161 | STX16       | 6.67227779 | 2.38456187 | 0.35738348 | 5.31199660  | 0 |
| 10976 | H200018687 | DCK         | 6.65468998 | 2.51137393 | 0.37738406 | 5.90114119  | 0 |
| 8027  | H200011876 | TFEC        | 6.63658592 | 4.26731310 | 0.64299825 | 16.61291434 | 0 |
| 8249  | H200012269 | PIK3CA      | 6.62976818 | 3.44644371 | 0.51984377 | 10.95133068 | 0 |
| 8410  | H200012669 | AGMAT       | 6.62920557 | 4.07947882 | 0.61537974 | 16.89689486 | 0 |
| 9284  | H200014424 | LOC440896   | 6.60326258 | 3.48109489 | 0.52717802 | 10.91718600 | 0 |
| 7465  | H200010966 | LOC284019   | 6.60322341 | 1.57051837 | 0.23784117 | 2.93484440  | 0 |
| 10900 | H200018379 | DCAMK1.2    | 6.59592206 | 3.08190578 | 0.46724412 | 8.36705029  | 0 |
| 10402 | H200017141 | LOC651959   | 6.58242268 | 2.78428280 | 0.42298754 | 7.12013270  | 0 |
| 9533  | H200014966 | TEAD3       | 6.58178595 | 1.97795086 | 0.30051887 | 4.16071034  | 0 |
| 10455 | H200017260 | CRKRS       | 6.57549370 | 3.49822255 | 0.53200911 | 11.15679716 | 0 |
| 7159  | H200010412 | NCALD       | 6.56188878 | 3.36249222 | 0.51242479 | 10.49356513 | 0 |
| 9556  | H200015019 | SC65        | 6.55882133 | 3.31946709 | 0.50610726 | 9.79475446  | 0 |
| 11325 | H200019523 | GHR1        | 6.55226030 | 3.00853004 | 0.45915912 | 8.41177476  | 0 |
| 8388  | H200012599 | GSTCD       | 6.53789655 | 4.04367947 | 0.61849854 | 13.84278063 | 0 |
| 2927  | H200003768 | ZNF529      | 6.53296483 | 3.90850681 | 0.59827458 | 13.77488306 | 0 |
| 8825  | H200013662 | KIAA1217    | 6.52792603 | 2.24441687 | 0.34381775 | 4.54687043  | 0 |
| 3745  | H200004941 | LPXN        | 6.52574522 | 2.60946020 | 0.39987160 | 6.05804786  | 0 |
| 1551  | H200001895 | BCL2L13     | 6.51259680 | 1.50890252 | 0.23168984 | 2.86176674  | 0 |
| 9301  | H200014461 | PABPC5      | 6.50463699 | 4.43415608 | 0.68169155 | 43.58035143 | 0 |
| 11500 | H200020047 | FBXO10      | 6.50295673 | 3.24431510 | 0.49889846 | 9.40093076  | 0 |
| 5875  | H200008009 | RREB1       | 6.49250433 | 2.50897177 | 0.38644129 | 5.86519771  | 0 |
| 6122  | H200008357 | COL1A2      | 6.48119675 | 2.28118175 | 0.35196922 | 4.77648005  | 0 |
| 10475 | H200017301 | PPP3R1      | 6.47961289 | 1.88933547 | 0.29158153 | 3.84434161  | 0 |
| 11408 | H200019779 | PCNX1.2     | 6.47440432 | 2.31736103 | 0.35792652 | 4.64413261  | 0 |
| 11327 | H200019526 | USP48       | 6.46159037 | 2.13412941 | 0.33027928 | 4.39216565  | 0 |
| 1066  | H200001262 | AXUD1       | 6.45803458 | 1.38456159 | 0.21439365 | 2.61782318  | 0 |
| 5612  | H200007598 | FCRLB       | 6.45549667 | 3.45983562 | 0.53595189 | 11.04597778 | 0 |
| 6697  | H200009493 | CYBSR1      | 6.45111419 | 2.80569075 | 0.43491568 | 6.81814648  | 0 |
| 11444 | H200019893 | TM6SF1      | 6.43966504 | 2.22251417 | 0.34512885 | 4.76195984  | 0 |
| 7330  | H200010677 | C1QC        | 6.43785230 | 3.73375230 | 0.57996862 | 11.41485219 | 0 |
| 8099  | H200012021 | HDAC9       | 6.43772586 | 2.88856406 | 0.44869324 | 7.39148158  | 0 |
| 5661  | H200007684 | LCORL       | 6.42353645 | 3.20493715 | 0.49893656 | 8.69190899  | 0 |
| 8392  | H200012617 | TTL1.2      | 6.39967848 | 2.01055650 | 0.31416524 | 3.95834927  | 0 |
| 10333 | H200016919 | PKD2L2      | 6.39407283 | 2.92464067 | 0.45739871 | 8.20560509  | 0 |
| 11278 | H200019415 | SLC6A16     | 6.37983748 | 2.86412638 | 0.44893407 | 7.12294479  | 0 |
| 10987 | H200018738 | PHGDHL1     | 6.37731099 | 3.03837347 | 0.47643489 | 8.43394594  | 0 |
| 4170  | H200005576 | SFXN5       | 6.36518264 | 2.75645833 | 0.43305251 | 6.23375103  | 0 |
| 6937  | H200010024 | TMTC2       | 6.36055382 | 4.74026692 | 0.74526009 | 21.25279650 | 0 |
| 7408  | H200010846 | SOX17       | 6.35518478 | 2.87316841 | 0.45209833 | 7.60169275  | 0 |
| 9781  | H200015528 | LOC440248   | 6.35421702 | 2.89514561 | 0.45562586 | 7.66235042  | 0 |
| 10962 | H200018604 | NTN4        | 6.35209205 | 2.47733171 | 0.39000249 | 5.38731871  | 0 |
| 11802 | H200021081 | TPM1        | 6.34781590 | 2.91639628 | 0.45943303 | 7.72392731  | 0 |
| 7301  | H200010632 | EYA1        | 6.33922197 | 2.19216349 | 0.34580955 | 4.62044481  | 0 |
| 10648 | H200017633 | ADAM30      | 6.33811555 | 2.99829976 | 0.47305855 | 8.55787384  | 0 |
| 7597  | H200011180 | FNTA        | 6.33354242 | 3.08921629 | 0.48775489 | 7.90673515  | 0 |

|       |            |           |            |            |            |             |   |
|-------|------------|-----------|------------|------------|------------|-------------|---|
| 8533  | H200012964 | TNKS      | 6.31892530 | 2,25449039 | 0,35678383 | 4,68710130  | 0 |
| 10927 | H200018522 | THADA     | 6.31237376 | 3,47034244 | 0,54976821 | 11,02372405 | 0 |
| 80    | H200000090 | IL10RA    | 6.30788096 | 3,23971362 | 0,51359777 | 10,59073829 | 0 |
| 10936 | H200018553 | PTK2      | 6.29889289 | 3,38271871 | 0,53703385 | 10,46260039 | 0 |
| 10228 | H200016607 | B3GALNT1  | 6.26383268 | 2,76283467 | 0,44107734 | 6,99478970  | 0 |
| 9939  | H200015829 | EML4      | 6.26221802 | 2,65162661 | 0,42343250 | 6,54664354  | 0 |
| 6978  | H200010107 | APTX      | 6.25835033 | 3,59669843 | 0,57470391 | 11,94075353 | 0 |
| 10914 | H200018451 | GRIK2     | 6.25455622 | 3,60711670 | 0,57671825 | 12,52222117 | 0 |
| 4704  | H200006327 | HLA-DRA   | 6.24241237 | 3,02674899 | 0,48486848 | 8,17659619  | 0 |
| 151   | H200000176 | DKK       | 6.24132636 | 2,91505853 | 0,46705754 | 7,56937066  | 0 |
| 3663  | H200004822 | P15RS     | 6.23303091 | 1,96658393 | 0,31551006 | 3,73315590  | 0 |
| 7696  | H200011360 | SPATA22   | 6.23039125 | 2,74748726 | 0,44098150 | 6,24857556  | 0 |
| 4589  | H200006192 | RB1       | 6.21716263 | 2,52006629 | 0,40534026 | 5,98746047  | 0 |
| 10878 | H200018311 | RANBP10   | 6.21496552 | 3,09473392 | 0,49794869 | 8,59672348  | 0 |
| 6012  | H200008177 | IL1RAP    | 6.21106892 | 2,69661083 | 0,43416212 | 5,99745134  | 0 |
| 10847 | H200018209 | LENG8     | 6.19656840 | 2,76249541 | 0,44581053 | 6,83250596  | 0 |
| 4227  | H200005670 | RBBP9     | 6.19252457 | 2,01025600 | 0,32462625 | 3,93856801  | 0 |
| 6426  | H200008852 | AEBP2     | 6.18133558 | 2,61486870 | 0,42302649 | 7,26745891  | 0 |
| 4394  | H200005939 | ITGA7     | 6.17730646 | 4,12269070 | 0,66739294 | 19,21392617 | 0 |
| 10950 | H200018580 | SLC24A3   | 6.17475003 | 2,82556332 | 0,45759963 | 6,72863032  | 0 |
| 1101  | H200001310 | NETO2     | 6.17338925 | 2,86509720 | 0,46410441 | 6,86135072  | 0 |
| 11705 | H200020719 | GUP1      | 6.17249806 | 3,41063875 | 0,55255404 | 10,65659376 | 0 |
| 10688 | H200017782 | ALS2CR13  | 6.16900591 | 3,09802877 | 0,50219254 | 8,71452613  | 0 |
| 10864 | H200018246 | PSPC1     | 6.16725963 | 3,57192010 | 0,57917460 | 11,19388050 | 0 |
| 1089  | H200001293 | C1orf98   | 6.16672722 | 3,99278373 | 0,64747209 | 11,53531589 | 0 |
| 8044  | H200011916 | MGC16385  | 6.16627208 | 1,81740197 | 0,29473269 | 3,45277321  | 0 |
| 10908 | H200018431 | RUFY3     | 6.15494748 | 3,51677409 | 0,57137353 | 13,32154046 | 0 |
| 2303  | H200002911 | SAP30L    | 6.14992636 | 3,76133867 | 0,61160711 | 11,05019877 | 0 |
| 7373  | H200010748 | ADAMTSL4  | 6.12730293 | 3,10694292 | 0,50706534 | 7,71796108  | 0 |
| 11870 | H200021279 | NFXL1     | 6.12647885 | 1,96026736 | 0,31996640 | 4,09339117  | 0 |
| 10942 | H200018563 | MKL1      | 6.11599665 | 2,47073566 | 0,40397924 | 5,49454879  | 0 |
| 11037 | H200018907 | TRIM27    | 6.11217822 | 2,75892789 | 0,45138211 | 6,96497555  | 0 |
| 10968 | H200018632 | KCNJ15    | 6.10526489 | 2,97080211 | 0,48659676 | 8,06352562  | 0 |
| 11773 | H200021004 | FLJ36166  | 6.10464391 | 2,96993238 | 0,48650379 | 8,17534696  | 0 |
| 901   | H200001060 | EXDL2     | 6.09685708 | 1,81344167 | 0,29743877 | 3,51080575  | 0 |
| 24    | H200000023 | ABHD14B   | 6.09098726 | 2,72950927 | 0,44812264 | 6,88903926  | 0 |
| 11285 | H200019434 | OPA1      | 6.08973909 | 4,06928851 | 0,66822050 | 14,27278000 | 0 |
| 9014  | H200013962 | EDEM1     | 6.08165526 | 2,03662566 | 0,33488016 | 3,96328547  | 0 |
| 10895 | H200018360 | ZNF559    | 6.08046915 | 4,02344161 | 0,66169921 | 14,91903463 | 0 |
| 3309  | H200004309 | HERC3     | 6.07812183 | 2,10219385 | 0,34586241 | 4,12378036  | 0 |
| 4090  | H200005466 | PCDH17    | 6.07660329 | 1,92276378 | 0,31642082 | 3,82719710  | 0 |
| 2156  | H200002714 | EDIL3     | 6.07643167 | 2,92799340 | 0,48186066 | 7,34205245  | 0 |
| 2877  | H200003697 | EVI5L     | 6.07591891 | 2,57499347 | 0,42380313 | 6,10558795  | 0 |
| 8372  | H200012570 | C1orf58   | 6.06191850 | 2,98364411 | 0,49219469 | 7,83282823  | 0 |
| 10294 | H200016758 | KLF12     | 6.05604349 | 3,29854539 | 0,54467003 | 9,58235522  | 0 |
| 9651  | H200015236 | L2HGDH    | 6.05139124 | 2,81525719 | 0,46522478 | 7,18390511  | 0 |
| 10910 | H200018434 | SMYD2     | 6.04679673 | 2,62474681 | 0,43407227 | 6,56421069  | 0 |
| 8104  | H200012033 | ZNF264    | 6.03581912 | 2,33580977 | 0,38699135 | 5,11194509  | 0 |
| 8583  | H200013067 | ZNF643    | 6.03550695 | 3,23814547 | 0,53651590 | 9,47731340  | 0 |
| 11205 | H200019228 | C1QTNF5   | 6.03510094 | 3,04051565 | 0,50380527 | 8,76727437  | 0 |
| 11077 | H200019004 | C1orf61   | 6.02124691 | 3,03241508 | 0,50361912 | 8,17032275  | 0 |
| 6037  | H200008209 | NAV3      | 6.01579618 | 1,56671828 | 0,26043407 | 2,89303012  | 0 |
| 11269 | H200019399 | C8orf72   | 6.00568844 | 2,43306679 | 0,40512704 | 5,10546915  | 0 |
| 5479  | H200007308 | ZNF230    | 6.00335118 | 2,80687571 | 0,46755148 | 7,81608283  | 0 |
| 11818 | H200021128 | FLJ21127  | 6.00261888 | 1,92894194 | 0,32135006 | 3,89563524  | 0 |
| 10970 | H200018650 | TCF7L2    | 6.00117582 | 2,92099958 | 0,48673788 | 7,57093140  | 0 |
| 6021  | H200008189 | EIF3S1    | 5.98978488 | 2,30803626 | 0,38532874 | 4,74565600  | 0 |
| 10416 | H200017191 | SLCO1B3   | 5.98628381 | 3,02802302 | 0,50582684 | 8,65298723  | 0 |
| 1126  | H200001344 | ERC2      | 5.98379104 | 3,10686032 | 0,51921270 | 9,07017912  | 0 |
| 10137 | H200016442 | MAPK14    | 5.97538707 | 3,85178768 | 0,64460890 | 11,91396995 | 0 |
| 7282  | H200010598 | LOC440895 | 5.97521373 | 2,93336298 | 0,49092185 | 7,92670958  | 0 |
| 7126  | H200010366 | PTPRG     | 5.97513464 | 2,67074377 | 0,44697633 | 5,87559389  | 0 |
| 8689  | H200013335 | LOC284561 | 5.97167153 | 1,92616876 | 0,32255102 | 3,92156884  | 0 |
| 8463  | H200012802 | LOC728190 | 5.97039228 | 2,33312596 | 0,39078269 | 5,06983228  | 0 |
| 10684 | H200017778 | FHL5      | 5.96603933 | 2,77943781 | 0,46587655 | 7,34232979  | 0 |
| 407   | H200000469 | MPQ       | 5.96478454 | 2,20487350 | 0,36964847 | 4,91292399  | 0 |
| 10149 | H200016468 | PTPRO     | 5.96042809 | 2,48971252 | 0,41770700 | 5,66323527  | 0 |
| 8415  | H200012675 | ALG11     | 5.96004665 | 2,53588221 | 0,42548026 | 5,80887902  | 0 |
| 4472  | H200006031 | PKIA      | 5.95952242 | 3,20147277 | 0,53720291 | 8,74229779  | 0 |
| 10314 | H200016838 | OR12D3    | 5.95546622 | 2,55698259 | 0,42935053 | 6,33197074  | 0 |
| 8505  | H200012902 | KIAA1542  | 5.95414113 | 3,16646873 | 0,53180949 | 9,11303368  | 0 |
| 8625  | H200013163 | CCDC71    | 5.95332344 | 2,55903525 | 0,42984986 | 5,93118322  | 0 |
| 10786 | H200018033 | PLCH1     | 5.94681634 | 2,92346345 | 0,49160144 | 7,82281592  | 0 |
| 3264  | H200004238 | OGFOD2    | 5.94324443 | 2,22376585 | 0,37416698 | 4,49289283  | 0 |
| 10017 | H200016169 | CD1E      | 5.93997235 | 3,07864090 | 0,51829213 | 8,12179748  | 0 |
| 4285  | H200005771 | HSPA4L    | 5.93514333 | 2,53436597 | 0,42701007 | 6,52644740  | 0 |
| 6613  | H200009348 | TPCN2     | 5.93013682 | 2,02044186 | 0,34070746 | 4,19763367  | 0 |
| 9804  | H200015564 | DENND1C   | 5.92963072 | 2,69709469 | 0,45485036 | 6,22768402  | 0 |
| 11042 | H200018917 | PLEKHM1   | 5.92832819 | 3,08139280 | 0,51977433 | 8,31021703  | 0 |
| 1774  | H200002195 | TMEM128   | 5.91596431 | 2,58331099 | 0,43666778 | 5,56956740  | 0 |
| 10887 | H200018337 | LOC647135 | 5.91249258 | 2,99714931 | 0,50691807 | 8,47188669  | 0 |
| 4316  | H200005827 | GNRHR     | 5.90258444 | 2,99239201 | 0,50696302 | 7,82858791  | 0 |
| 358   | H200000414 | GSTT2     | 5.90234147 | 2,07212187 | 0,35106777 | 4,26860008  | 0 |
| 8337  | H200012502 | C6orf199  | 5.90094616 | 3,89208333 | 0,65956937 | 25,03855012 | 0 |
| 8948  | H200013865 | KIAA0701  | 5.89882579 | 3,32813340 | 0,56420269 | 9,48619331  | 0 |
| 10535 | H200017455 | TMEM38B   | 5.89346977 | 2,13596226 | 0,36242864 | 4,65117395  | 0 |
| 10814 | H200018147 | PKP4      | 5.89202290 | 2,95994697 | 0,50236515 | 7,95491313  | 0 |
| 8841  | H200013689 | PCBD2     | 5.88554005 | 2,90026370 | 0,49277784 | 7,91664837  | 0 |
| 11781 | H200021026 | DIAPH3    | 5.88187499 | 3,55341236 | 0,60412919 | 11,40106433 | 0 |
| 8614  | H200013134 | ABCC9     | 5.87452897 | 2,83623970 | 0,48280291 | 7,13502150  | 0 |
| 7124  | H200010364 | NRL       | 5.86722296 | 2,98769360 | 0,50921767 | 8,26571152  | 0 |

|       |            |                  |            |            |            |             |   |
|-------|------------|------------------|------------|------------|------------|-------------|---|
| 7397  | H200010817 | <u>MTFR1</u>     | 5.86699700 | 2.95733273 | 0.50406242 | 7.68108705  | 0 |
| 2822  | H200003624 | <u>CCRK</u>      | 5.86418118 | 3.08094362 | 0.52538343 | 8.43336938  | 0 |
| 11130 | H200019089 | <u>APBA2BP</u>   | 5.84643761 | 2.36875927 | 0.40516284 | 6.04790922  | 0 |
| 11704 | H200020718 | <u>TPST2</u>     | 5.84081845 | 3.38380284 | 0.57933710 | 12.02543489 | 0 |
| 9746  | H200015443 | <u>PHC3</u>      | 5.83785012 | 2.79719244 | 0.47914770 | 7.20695458  | 0 |
| 6464  | H200008920 | <u>HRH4</u>      | 5.83470382 | 3.28811830 | 0.56354502 | 9.80443925  | 0 |
| 1080  | H200001282 | <u>SLC7A11</u>   | 5.83251714 | 2.65688447 | 0.45552965 | 7.65720695  | 0 |
| 228   | H200000271 | <u>REG1A</u>     | 5.83123352 | 2.87401406 | 0.49286554 | 8.09758452  | 0 |
| 5709  | H200007762 | <u>TAS2R1</u>    | 5.82629004 | 3.21011325 | 0.55097038 | 9.02393634  | 0 |
| 5036  | H200006723 | <u>STS</u>       | 5.81496075 | 2.52534968 | 0.43428490 | 6.02025858  | 0 |
| 11730 | H200020839 | <u>CAPN1</u>     | 5.81342213 | 3.69119708 | 0.63494393 | 14.97774219 | 0 |
| 2500  | H200003177 | <u>SCN1A</u>     | 5.81295814 | 3.07166478 | 0.52841681 | 8.22146034  | 0 |
| 2538  | H200003224 | <u>UGCGL2</u>    | 5.81183423 | 2.30288509 | 0.39624067 | 5.19185732  | 0 |
| 9510  | H200014904 | <u>ENTPD4</u>    | 5.80797330 | 1.85725770 | 0.31977725 | 3.60126833  | 0 |
| 8553  | H200012997 | <u>XPNPEP3</u>   | 5.80450909 | 3.17049739 | 0.54621284 | 8.45295085  | 0 |
| 3870  | H200005125 | <u>SCGB3A2</u>   | 5.80353653 | 2.26155573 | 0.38968579 | 4.30813126  | 0 |
| 3093  | H200003991 | <u>SLC19A2</u>   | 5.80323921 | 2.75293379 | 0.47437882 | 6.52176140  | 0 |
| 7275  | H200010590 | <u>ARHGAP24</u>  | 5.79976300 | 3.06253499 | 0.52804485 | 8.57947773  | 0 |
| 1079  | H200001281 | <u>HECA</u>      | 5.79526770 | 1.74861495 | 0.30173152 | 3.63850594  | 0 |
| 9015  | H200013963 | <u>VPS13A</u>    | 5.78698043 | 3.13064763 | 0.54098120 | 9.30822641  | 0 |
| 10830 | H200018176 | <u>CCL2</u>      | 5.77507512 | 2.79236459 | 0.48352005 | 6.70322752  | 0 |
| 10758 | H200017959 | <u>RFTN1</u>     | 5.76944417 | 2.69690201 | 0.46744572 | 7.03645443  | 0 |
| 1241  | H200001489 | <u>C16orf5</u>   | 5.76776769 | 1.55907067 | 0.27030747 | 2.92246740  | 0 |
| 1162  | H200001390 | <u>RBAK</u>      | 5.76431770 | 1.58877531 | 0.27562244 | 3.02947288  | 0 |
| 11732 | H200020846 | <u>C10orf112</u> | 5.76231426 | 1.86014532 | 0.32281220 | 3.61497874  | 0 |
| 5687  | H200007733 | <u>STAT5A</u>    | 5.76110220 | 2.69870200 | 0.46843502 | 5.92193490  | 0 |
| 10164 | H200016499 | <u>MULK</u>      | 5.75936781 | 1.96639950 | 0.34142628 | 3.86035156  | 0 |
| 11194 | H200019193 | <u>C16orf70</u>  | 5.75695163 | 2.00294208 | 0.34791713 | 4.19394972  | 0 |
| 8613  | H200013133 | <u>C1GALT1C1</u> | 5.75671713 | 2.48193467 | 0.43113716 | 5.78944788  | 0 |
| 3024  | H200003900 | <u>HPS5</u>      | 5.75513741 | 2.06109240 | 0.35813087 | 4.09700432  | 0 |
| 11207 | H200019238 | <u>FKSG83</u>    | 5.75040528 | 2.66764453 | 0.46390548 | 6.10590951  | 0 |
| 8122  | H200012072 | <u>COL17A1</u>   | 5.74616645 | 2.00577120 | 0.34960249 | 4.00512205  | 0 |
| 10896 | H200018365 | <u>IL1RAPL1</u>  | 5.74494530 | 2.91671940 | 0.50770186 | 7.59371244  | 0 |
| 10630 | H200017600 | <u>NUDT16</u>    | 5.73830604 | 2.60203655 | 0.45345029 | 6.54115534  | 0 |
| 7683  | H200011334 | <u>TMEM45A</u>   | 5.73710347 | 2.01014129 | 0.35037564 | 3.96926266  | 0 |
| 5034  | H200006721 | <u>KIAA1333</u>  | 5.73652780 | 2.93523705 | 0.51167486 | 7.25746374  | 0 |
| 9222  | H200014304 | <u>NOTCH1</u>    | 5.73367761 | 1.66075211 | 0.28964867 | 3.11516371  | 0 |
| 2535  | H200003221 | <u>KIAA1576</u>  | 5.73340468 | 2.72262723 | 0.47487093 | 6.38091511  | 0 |
| 7544  | H200011080 | <u>GOSR2</u>     | 5.73300098 | 1.65631246 | 0.28890846 | 3.07856816  | 0 |
| 10983 | H200018723 | <u>KRTAP4-8</u>  | 5.73271658 | 4.15066714 | 0.72403146 | 31.19454854 | 0 |
| 11799 | H200021070 | <u>RGS6</u>      | 5.73006415 | 2.62285229 | 0.45773524 | 6.49032380  | 0 |
| 11281 | H200019422 | <u>KIAA0408</u>  | 5.73006333 | 2.74267498 | 0.47864654 | 7.17963816  | 0 |
| 8283  | H200012363 | <u>C7orf31</u>   | 5.72958415 | 2.01243245 | 0.35123534 | 4.14099131  | 0 |
| 561   | H200000661 | <u>GLRA2</u>     | 5.72776319 | 1.64924368 | 0.28793852 | 2.92732710  | 0 |
| 8411  | H200012670 | <u>UHMK1</u>     | 5.72053303 | 2.38528710 | 0.41696938 | 5.38670741  | 0 |
| 6086  | H200008308 | <u>MEFAP3L</u>   | 5.72051329 | 3.23542639 | 0.56558323 | 8.51190430  | 0 |
| 8217  | H200012206 | <u>HEXA</u>      | 5.71412651 | 1.35608391 | 0.23732130 | 2.54997853  | 0 |
| 1100  | H200001309 | <u>C10orf9</u>   | 5.71089083 | 2.89976844 | 0.50776114 | 8.10843246  | 0 |
| 10917 | H200018464 | <u>SBNQ1</u>     | 5.71030854 | 2.77934050 | 0.48672335 | 7.07226755  | 0 |
| 10860 | H200018231 | <u>MPP5</u>      | 5.69785000 | 2.66441345 | 0.46761734 | 6.37670300  | 0 |
| 11755 | H200020955 | <u>SYMPK</u>     | 5.68261260 | 4.18521761 | 0.73649532 | 69.83094760 | 0 |
| 10409 | H200017154 | <u>RAB28</u>     | 5.67318992 | 2.95273112 | 0.52047105 | 7.08465504  | 0 |
| 10711 | H200017831 | <u>QR2S2</u>     | 5.66733107 | 2.84018372 | 0.50115013 | 7.64878444  | 0 |
| 9662  | H200015257 | <u>TAF7L</u>     | 5.66559505 | 2.79791723 | 0.49381176 | 7.20533192  | 0 |
| 753   | H200000882 | <u>FLJ40432</u>  | 5.66334887 | 2.08243965 | 0.36770464 | 4.51324202  | 0 |
| 464   | H200000540 | <u>EPS8</u>      | 5.66110601 | 2.28239793 | 0.40317173 | 4.93059361  | 0 |
| 11364 | H200019657 | <u>JAM3</u>      | 5.65396321 | 1.76668205 | 0.31246791 | 3.38616440  | 0 |
| 11010 | H200018845 | <u>ZNF3</u>      | 5.64621422 | 2.67424871 | 0.47363572 | 6.69066925  | 0 |
| 670   | H200000789 | <u>TMEM98</u>    | 5.64552056 | 1.79619589 | 0.31816302 | 3.30224935  | 0 |
| 5660  | H200007683 | <u>C1orf136</u>  | 5.63914546 | 2.56447157 | 0.45476244 | 6.06686778  | 0 |
| 9274  | H200014398 | <u>RPS6KA3</u>   | 5.63467119 | 2.26050543 | 0.40117788 | 4.92027390  | 0 |
| 10916 | H200018454 | <u>MARCH8</u>    | 5.63081482 | 1.41658381 | 0.25157705 | 2.67923596  | 0 |
| 11289 | H200019446 | <u>MYO1E</u>     | 5.62667846 | 2.76172602 | 0.49082706 | 7.01796379  | 0 |
| 5802  | H200007901 | <u>TTC33</u>     | 5.62444650 | 3.18283564 | 0.56589313 | 8.96656248  | 0 |
| 11707 | H200020727 | <u>REPS2</u>     | 5.61859751 | 2.41353855 | 0.42956246 | 5.30596225  | 0 |
| 7577  | H200011142 | <u>USP53</u>     | 5.61678680 | 2.64999964 | 0.47179993 | 5.44939419  | 0 |
| 569   | H200000672 | <u>HOXB2</u>     | 5.61507496 | 3.23604443 | 0.57631366 | 9.67884678  | 0 |
| 2677  | H200003425 | <u>PPCDC</u>     | 5.60219781 | 2.84503497 | 0.50784265 | 7.16914098  | 0 |
| 7381  | H200010771 | <u>LOC220930</u> | 5.60189345 | 2.25649593 | 0.40280951 | 4.44773000  | 0 |
| 5068  | H200006762 | <u>F13A1</u>     | 5.60127663 | 1.90155746 | 0.33948644 | 3.79084513  | 0 |
| 7341  | H200010697 | <u>MYO7A</u>     | 5.60102698 | 2.12549360 | 0.37948283 | 4.50688046  | 0 |
| 9213  | H200014292 | <u>STK38L</u>    | 5.59780113 | 2.04363377 | 0.36507795 | 3.88182358  | 0 |
| 4008  | H200005329 | <u>GPR87</u>     | 5.59402858 | 2.75661921 | 0.49277889 | 7.88877707  | 0 |
| 11761 | H200020975 | <u>ZNF396</u>    | 5.58714921 | 3.00963650 | 0.53867122 | 9.01114019  | 0 |
| 9494  | H200014871 | <u>NUDT11</u>    | 5.58652953 | 3.21151480 | 0.57486760 | 9.62655378  | 0 |
| 11674 | H200020517 | <u>RETN2</u>     | 5.58450356 | 3.00710024 | 0.53847226 | 8.28929007  | 0 |
| 1828  | H200002267 | <u>COG3</u>      | 5.57740710 | 1.96252154 | 0.35186987 | 4.06525564  | 0 |
| 10051 | H200016244 | <u>CACNB3</u>    | 5.57138557 | 1.99407067 | 0.35791288 | 3.90361082  | 0 |
| 10373 | H200017003 | <u>C7orf28B</u>  | 5.56522955 | 2.41798976 | 0.43448159 | 5.68269818  | 0 |
| 5684  | H200007729 | <u>GRIN2A</u>    | 5.56325487 | 2.50400341 | 0.45009684 | 6.09613361  | 0 |
| 10619 | H200017579 | <u>TMEM68</u>    | 5.55746102 | 1.72169587 | 0.30979900 | 3.24945958  | 0 |
| 8061  | H200011946 | <u>MSH4</u>      | 5.55718993 | 2.49002590 | 0.44807284 | 6.01657294  | 0 |
| 9743  | H200015439 | <u>PURB</u>      | 5.55018566 | 3.20184352 | 0.57688944 | 13.06909540 | 0 |
| 7242  | H200010537 | <u>PITX2</u>     | 5.53922432 | 1.73622540 | 0.31344197 | 3.16781552  | 0 |
| 8885  | H200013768 | <u>ST18</u>      | 5.53829617 | 2.69649253 | 0.48688124 | 7.67819344  | 0 |
| 6899  | H200009942 | <u>CBLB</u>      | 5.53082903 | 2.82605180 | 0.51096351 | 6.97687341  | 0 |
| 3928  | H200005201 | <u>NKX3-1</u>    | 5.52056953 | 2.19925318 | 0.39837433 | 4.30541382  | 0 |
| 9924  | H200015785 | <u>CRNN</u>      | 5.51987805 | 2.77031518 | 0.50187978 | 7.24492918  | 0 |
| 1084  | H200001287 | <u>TRAK1</u>     | 5.51279788 | 2.22667557 | 0.40391025 | 4.68765996  | 0 |
| 4476  | H200006035 | <u>TYRP1</u>     | 5.51091886 | 2.32721143 | 0.42229100 | 5.76851547  | 0 |
| 11247 | H200019348 | <u>IFT81</u>     | 5.50770078 | 2.15668868 | 0.39157695 | 4.57260001  | 0 |

|       |            |           |            |            |            |             |   |
|-------|------------|-----------|------------|------------|------------|-------------|---|
| 3487  | H200004565 | ZNF85     | 5,50760761 | 2,65550007 | 0,48215128 | 6,00462370  | 0 |
| 6986  | H200010131 | EDEM3     | 5,49612008 | 3,18279736 | 0,57909895 | 8,76586034  | 0 |
| 8900  | H200013787 | PRIC285   | 5,49109758 | 2,49975800 | 0,45523831 | 5,24774662  | 0 |
| 5788  | H200007881 | HS2ST1    | 5,48809393 | 2,34070581 | 0,42650615 | 4,81925571  | 0 |
| 7541  | H200011073 | ATP8B1    | 5,48358265 | 1,95734872 | 0,35694706 | 3,82694645  | 0 |
| 3773  | H200004980 | TBX19     | 5,48154064 | 2,69281005 | 0,49125059 | 6,74148324  | 0 |
| 10635 | H200017608 | FABP2     | 5,48113529 | 1,51129629 | 0,27572687 | 2,87284054  | 0 |
| 1387  | H200001686 | TMEM47    | 5,47993784 | 2,04783975 | 0,37369762 | 4,01593830  | 0 |
| 7021  | H200010190 | FAM38A    | 5,47740917 | 2,81178093 | 0,51334141 | 7,04843517  | 0 |
| 6711  | H200009520 | ERCC5     | 5,47287196 | 2,29556441 | 0,41944420 | 4,59179761  | 0 |
| 6831  | H200009777 | FLJ34870  | 5,46918857 | 2,79777480 | 0,51155208 | 7,15760226  | 0 |
| 9017  | H200013965 | ELF1      | 5,46698226 | 1,64954907 | 0,30172936 | 3,06933895  | 0 |
| 8239  | H200012244 | NUFIP1    | 5,46514960 | 2,42136221 | 0,44305507 | 5,11542485  | 0 |
| 7823  | H200011558 | ZNF398    | 5,46210841 | 2,26559606 | 0,41478416 | 5,27740133  | 0 |
| 9233  | H200014318 | CAMSAP1   | 5,45567014 | 1,46018312 | 0,26764505 | 2,81461243  | 0 |
| 8150  | H200012108 | PBX4      | 5,45502461 | 1,95613799 | 0,35859380 | 3,52739520  | 0 |
| 913   | H200001073 | FBXL5     | 5,45228018 | 2,17730783 | 0,39933895 | 4,64638433  | 0 |
| 8906  | H200013797 | LARP2     | 5,45166856 | 2,45459519 | 0,45024659 | 5,46111797  | 0 |
| 10949 | H200018578 | EEF1G     | 5,44400940 | 1,86920396 | 0,34335061 | 3,43172735  | 0 |
| 2408  | H200003053 | C9orf5    | 5,44248366 | 2,72875534 | 0,50138053 | 5,70953883  | 0 |
| 5445  | H200007252 | ZNF461    | 5,44183969 | 3,22747922 | 0,59308605 | 12,38235755 | 0 |
| 782   | H200000920 | IQSEC1    | 5,44090340 | 2,34663596 | 0,43129528 | 5,24370960  | 0 |
| 6806  | H200009689 | PNMA3     | 5,43756619 | 3,09908717 | 0,56994013 | 10,20325583 | 0 |
| 11532 | H200020124 | RBPSUH    | 5,43453656 | 2,99628901 | 0,55134214 | 8,00216060  | 0 |
| 8650  | H200013232 | PAX8      | 5,43249854 | 2,58892678 | 0,47656281 | 6,60611949  | 0 |
| 8692  | H200013338 | PPP1R3F   | 5,43002110 | 2,74207106 | 0,50498350 | 6,82249984  | 0 |
| 818   | H200000962 | LDB2      | 5,42551668 | 2,91269488 | 0,53685115 | 8,36512955  | 0 |
| 3447  | H200004506 | GUF1      | 5,42118287 | 1,64089128 | 0,30268141 | 3,06252314  | 0 |
| 10453 | H200017258 | C2orf37   | 5,41980716 | 2,50916377 | 0,46296182 | 6,08209760  | 0 |
| 10298 | H200016771 | EN1       | 5,41711284 | 2,73887426 | 0,50559668 | 7,10655119  | 0 |
| 10327 | H200016900 | TAS2R9    | 5,41544016 | 2,68799391 | 0,49635742 | 6,50628494  | 0 |
| 9609  | H200015140 | KIAA1446  | 5,41411205 | 2,51878557 | 0,46522598 | 6,08103071  | 0 |
| 6591  | H200009295 | CEP152    | 5,41116273 | 3,15861197 | 0,58372149 | 10,18363821 | 0 |
| 11867 | H200021274 | OR5F2     | 5,41076356 | 2,18758249 | 0,40430199 | 5,05521081  | 0 |
| 6499  | H200009034 | GRSF1     | 5,41050901 | 2,07832933 | 0,38412825 | 4,21337752  | 0 |
| 10263 | H200016680 | UGT2B7    | 5,40544483 | 2,28165036 | 0,42210224 | 4,65831341  | 0 |
| 8559  | H200013005 | LOC115110 | 5,40388137 | 1,74285172 | 0,32251850 | 3,48641214  | 0 |
| 8291  | H200012380 | METTL4    | 5,40144778 | 1,31828327 | 0,24406110 | 2,49159938  | 0 |
| 404   | H200000466 | HLA-DOB   | 5,40062262 | 3,04899065 | 0,56456280 | 11,51546816 | 0 |
| 11014 | H200018860 | PRDM15    | 5,39967534 | 2,40273653 | 0,44497796 | 5,22520491  | 0 |
| 5417  | H200007199 | SMPX      | 5,39892366 | 3,05826124 | 0,56645758 | 9,32000479  | 0 |
| 11086 | H200019020 | ZNF710    | 5,39875002 | 2,43924563 | 0,45181674 | 5,60742360  | 0 |
| 8141  | H200012094 | LOC144486 | 5,39500879 | 2,80828221 | 0,52053339 | 7,38724276  | 0 |
| 9953  | H200015856 | ARTS-1    | 5,39495171 | 3,09177938 | 0,57308750 | 7,67816566  | 0 |
| 9373  | H200014642 | DNA2L     | 5,39311239 | 2,63360937 | 0,48832829 | 5,72164967  | 0 |
| 8763  | H200013502 | WDR35     | 5,39133351 | 2,94701636 | 0,54662105 | 6,93505343  | 0 |
| 9561  | H200015038 | GAL3ST3   | 5,38653715 | 2,34521704 | 0,43538492 | 4,99526234  | 0 |
| 11282 | H200019428 | KAL1      | 5,38588315 | 3,17909057 | 0,59026356 | 6,95621481  | 0 |
| 9808  | H200015569 | CLEC4E    | 5,38496783 | 2,31903352 | 0,43064947 | 5,34623218  | 0 |
| 1133  | H200001351 | C2orf33   | 5,38055605 | 2,13978741 | 0,39768890 | 4,57951219  | 0 |
| 4037  | H200005372 | GSP2      | 5,37750582 | 2,38529362 | 0,44356877 | 4,87298403  | 0 |
| 11545 | H200020151 | CNTROB    | 5,37644858 | 2,33260444 | 0,43385599 | 4,83269474  | 0 |
| 10790 | H200018048 | PHTF1     | 5,37325786 | 2,30318291 | 0,42863808 | 4,97938487  | 0 |
| 7134  | H200010377 | AKAP6     | 5,35880386 | 2,55685477 | 0,47713162 | 6,30918578  | 0 |
| 11329 | H200019530 | HMCN1     | 5,35821833 | 2,77356171 | 0,51762760 | 6,60262985  | 0 |
| 9648  | H200015224 | ZNF696    | 5,35603822 | 2,23328344 | 0,41696555 | 4,64357255  | 0 |
| 10304 | H200016781 | MARK3     | 5,35403215 | 2,74465486 | 0,51263324 | 6,70200360  | 0 |
| 1009  | H200001196 | VARSL     | 5,34787252 | 1,54144048 | 0,28823433 | 3,01777817  | 0 |
| 11856 | H200021241 | ATG10     | 5,34590069 | 3,06957043 | 0,57419144 | 9,65023606  | 0 |
| 10643 | H200017625 | C10orf88  | 5,34564594 | 1,25012915 | 0,23385933 | 2,40828279  | 0 |
| 9598  | H200015125 | POU4F1    | 5,34507347 | 2,70906248 | 0,50683354 | 6,74519313  | 0 |
| 4994  | H200006670 | ZNF592    | 5,34396383 | 2,18067250 | 0,40806274 | 4,48800069  | 0 |
| 5484  | H200007318 | HAP1      | 5,34317394 | 3,09834235 | 0,57986927 | 8,93282919  | 0 |
| 10357 | H200016973 | C1orf63   | 5,33417221 | 2,31617024 | 0,43421362 | 5,38373300  | 0 |
| 4499  | H200006062 | CRH       | 5,33306320 | 2,56113692 | 0,48023750 | 6,26527010  | 0 |
| 8126  | H200012076 | SLC2A13   | 5,32989599 | 2,60647062 | 0,48902842 | 6,46555965  | 0 |
| 8705  | H200013364 | TRIM27    | 5,32596625 | 1,33102438 | 0,24991228 | 2,57357824  | 0 |
| 3426  | H200004481 | CCDC76    | 5,32479666 | 2,43207643 | 0,45674541 | 4,99211848  | 0 |
| 5616  | H200007806 | CCDC54    | 5,32267865 | 3,29072877 | 0,61824675 | 9,31875615  | 0 |
| 10289 | H200016747 | FLJ16542  | 5,32116566 | 1,64639205 | 0,30940440 | 3,10105504  | 0 |
| 2480  | H200003149 | KIAA1737  | 5,31972729 | 1,57033768 | 0,29519139 | 3,00945596  | 0 |
| 9566  | H200015053 | PRRG3     | 5,31951998 | 2,52702032 | 0,47504668 | 5,49021930  | 0 |
| 11774 | H200021008 | MGC72104  | 5,31751185 | 2,46023502 | 0,46266658 | 5,30219352  | 0 |
| 444   | H200000515 | TCN1      | 5,31668830 | 2,51758608 | 0,47352524 | 7,23637249  | 0 |
| 10886 | H200018333 | SLC41A2   | 5,31572210 | 2,32935017 | 0,43820014 | 5,55674387  | 0 |
| 5486  | H200007322 | CHST3     | 5,31442458 | 2,42639528 | 0,45656783 | 5,48474642  | 0 |
| 210   | H200000249 | MYH3      | 5,30995652 | 2,36193698 | 0,44481287 | 5,38119870  | 0 |
| 5256  | H200006995 | COL5A2    | 5,30863534 | 2,18973445 | 0,41248538 | 4,76161531  | 0 |
| 4494  | H200006056 | RMND5A    | 5,30625883 | 2,15456375 | 0,40604196 | 4,39925839  | 0 |
| 3944  | H200005222 | HEXIM2    | 5,30588737 | 2,21952390 | 0,41831342 | 4,60008808  | 0 |
| 8843  | H200013697 | ZMYM4     | 5,30317294 | 2,35232711 | 0,44356975 | 5,23517434  | 0 |
| 9082  | H200014065 | CYorf15B  | 5,29462247 | 1,44397533 | 0,27272489 | 2,69665391  | 0 |
| 7216  | H200010499 | CDSN      | 5,29443589 | 1,70311475 | 0,32168012 | 3,31268640  | 0 |
| 8768  | H200013514 | ZNF684    | 5,28867841 | 2,19346780 | 0,41474781 | 4,60090570  | 0 |
| 7056  | H200010251 | SPAG17    | 5,28709756 | 2,69918369 | 0,51052277 | 6,57219257  | 0 |
| 10791 | H200018054 | BTN2A3    | 5,28519129 | 2,22449074 | 0,42089125 | 4,89373686  | 0 |
| 3357  | H200004383 | CRYBB1    | 5,28023783 | 2,94292258 | 0,55734659 | 7,74300209  | 0 |
| 10981 | H200018721 | KRTAP4-10 | 5,27968582 | 4,17740733 | 0,79122271 | 34,00214336 | 0 |
| 7526  | H200011047 | GRIA3     | 5,27318443 | 1,79948607 | 0,34125225 | 3,68130898  | 0 |
| 9310  | H200014479 | GOPC      | 5,26793593 | 2,37163291 | 0,45020155 | 5,48502307  | 0 |
| 4948  | H200006617 | CCNG2     | 5,26674325 | 1,81216989 | 0,34407789 | 3,29736762  | 0 |

|       |            |                           |            |            |             |             |   |
|-------|------------|---------------------------|------------|------------|-------------|-------------|---|
| 7780  | H200011496 | <a href="#">C1orf25</a>   | 5,26403201 | 3,44382309 | 0,65421773  | 14,91554388 | 0 |
| 7338  | H200010691 | <a href="#">TCEAL1</a>    | 5,26034917 | 2,63620958 | 0,50114726  | 6,82104149  | 0 |
| 2794  | H200003581 | <a href="#">MYCN</a>      | 5,25455021 | 1,94375697 | 0,36991881  | 3,76969695  | 0 |
| 8721  | H200013396 | <a href="#">PRKD3</a>     | 5,25409612 | 1,69229734 | 0,32209105  | 3,19815702  | 0 |
| 10872 | H200018268 | <a href="#">ZFAND6</a>    | 5,25033746 | 2,35663093 | 0,44885323  | 5,21423691  | 0 |
| 7262  | H200010569 | <a href="#">NF1</a>       | 5,24913333 | 2,32595211 | 0,44311165  | 4,54491888  | 0 |
| 7907  | H200011678 | <a href="#">IL17B</a>     | 5,24823602 | 2,57179529 | 0,49003042  | 5,73092657  | 0 |
| 4187  | H200005611 | <a href="#">ITSN1</a>     | 5,24714183 | 2,56966723 | 0,48972704  | 6,05875569  | 0 |
| 4230  | H200005674 | <a href="#">C1orf27</a>   | 5,24712042 | 1,43856135 | 0,27416206  | 2,69374630  | 0 |
| 2181  | H200002744 | <a href="#">SLC36A1</a>   | 5,24543421 | 1,53847941 | 0,29329877  | 2,90043768  | 0 |
| 6911  | H200009965 | <a href="#">LMBRD1</a>    | 5,24450743 | 2,65827867 | 0,50686908  | 6,57620038  | 0 |
| 9902  | H200015728 | <a href="#">KCNH4</a>     | 5,24385011 | 2,44096475 | 0,46549095  | 5,63893164  | 0 |
| 8036  | H200011902 | <a href="#">LRRC31</a>    | 5,24262356 | 2,34315578 | 0,44694336  | 5,40765572  | 0 |
| 4121  | H200005516 | <a href="#">MTMR3</a>     | 5,23947566 | 1,92950670 | 0,36826332  | 3,62685575  | 0 |
| 9208  | H200014285 | <a href="#">TMEM69</a>    | 5,23631845 | 2,16027328 | 0,41255575  | 4,42583413  | 0 |
| 2721  | H200003487 | <a href="#">PGAP1</a>     | 5,23599842 | 2,25688593 | 0,43103258  | 4,88186801  | 0 |
| 7240  | H200010535 | <a href="#">HMG2L1</a>    | 5,23587625 | 2,44211599 | 0,46641973  | 4,94996373  | 0 |
| 4180  | H200005599 | <a href="#">TAOK2</a>     | 5,23563681 | 2,45353788 | 0,46862263  | 5,27411390  | 0 |
| 7862  | H200011610 | <a href="#">SORBS1</a>    | 5,23530727 | 2,39918095 | 0,45826937  | 5,22277875  | 0 |
| 11262 | H200019386 | <a href="#">AVIL</a>      | 5,23436862 | 2,26984980 | 0,43364347  | 4,89142939  | 0 |
| 9737  | H200015425 | <a href="#">CEACAM21</a>  | 5,23385453 | 1,83953498 | 0,35146850  | 3,90766093  | 0 |
| 11874 | H200021293 | <a href="#">TST</a>       | 5,23379389 | 1,63757493 | 0,31288437  | 2,92805482  | 0 |
| 9715  | H200015393 | <a href="#">XPR1</a>      | 5,23363681 | 1,97661820 | 0,37767584  | 4,13095277  | 0 |
| 7584  | H200011154 | <a href="#">KBTBD3</a>    | 5,23233610 | 2,49208641 | 0,47628561  | 5,93436122  | 0 |
| 2967  | H200003822 | <a href="#">PPP2R3A</a>   | 5,23031596 | 2,47525594 | 0,47325170  | 5,57576133  | 0 |
| 10794 | H200018091 | <a href="#">CLTC</a>      | 5,22679954 | 1,72225528 | 0,32950475  | 3,31455109  | 0 |
| 8075  | H200011973 | <a href="#">REXO1</a>     | 5,22265375 | 2,46684158 | 0,47233489  | 5,28225138  | 0 |
| 10163 | H200016497 | <a href="#">PACS1</a>     | 5,21890619 | 2,15691911 | 0,41328950  | 4,39931547  | 0 |
| 10136 | H200016438 | <a href="#">KIAA1797</a>  | 5,21781834 | 2,66512581 | 0,51077397  | 6,30422344  | 0 |
| 8676  | H200013297 | <a href="#">FAM55C</a>    | 5,21711713 | 2,31522499 | 0,44377478  | 5,07066945  | 0 |
| 7174  | H200010438 | <a href="#">SPTLC1</a>    | 5,21671959 | 1,58290701 | 0,30342957  | 2,99543820  | 0 |
| 3843  | H200005082 | <a href="#">SIX1</a>      | 5,21555134 | 2,62540896 | 0,50338091  | 6,31103867  | 0 |
| 11717 | H200020773 | <a href="#">CNTNAP5</a>   | 5,21451883 | 2,34488208 | 0,44968331  | 5,38469247  | 0 |
| 7833  | H200011570 | <a href="#">TMEM126A</a>  | 5,21435048 | 1,67614664 | 0,321144879 | 3,10145937  | 0 |
| 9555  | H200015017 | <a href="#">SSH2</a>      | 5,21034796 | 2,79998060 | 0,53738841  | 7,22090175  | 0 |
| 9859  | H200015648 | <a href="#">C6orf194</a>  | 5,20720692 | 2,62003730 | 0,50315598  | 6,50535103  | 0 |
| 677   | H200000796 | <a href="#">FUSIP1</a>    | 5,20295970 | 1,90717864 | 0,36655649  | 3,74205421  | 0 |
| 8262  | H200012290 | <a href="#">HNF4G</a>     | 5,20144775 | 2,37043899 | 0,45572677  | 5,49521110  | 0 |
| 6956  | H200010056 | <a href="#">GPR161</a>    | 5,20129297 | 2,02892400 | 0,39008070  | 4,28102420  | 0 |
| 7434  | H200010906 | <a href="#">ADPRHL1</a>   | 5,19826811 | 2,06836954 | 0,39789559  | 4,32250206  | 0 |
| 8056  | H200011937 | <a href="#">GRK4</a>      | 5,19246537 | 3,31782115 | 0,63896837  | 10,38224543 | 0 |
| 1971  | H200002467 | <a href="#">ANKRD13A</a>  | 5,19037978 | 1,23996794 | 0,23889734  | 2,29363483  | 0 |
| 10370 | H200016992 | <a href="#">PCYT1A</a>    | 5,18996777 | 2,14058275 | 0,41244625  | 4,08561095  | 0 |
| 10031 | H200016210 | <a href="#">ZNF445</a>    | 5,18814937 | 2,37111024 | 0,45702428  | 5,15784319  | 0 |
| 1008  | H200001193 | <a href="#">Gcom1</a>     | 5,18596031 | 2,11660333 | 0,40814106  | 4,18000365  | 0 |
| 1135  | H200001354 | <a href="#">FBXQ25</a>    | 5,18261396 | 2,29777702 | 0,44336257  | 5,25279609  | 0 |
| 1005  | H200001187 | <a href="#">C1orf58</a>   | 5,18211597 | 1,90491590 | 0,36759422  | 4,20323893  | 0 |
| 3199  | H200004126 | <a href="#">SNX1</a>      | 5,18098105 | 2,33817086 | 0,45129886  | 5,06785651  | 0 |
| 8306  | H200012423 | <a href="#">ENTPD2</a>    | 5,17843004 | 2,43136793 | 0,46951835  | 5,16997869  | 0 |
| 9     | H200000008 | <a href="#">MS4A2</a>     | 5,17777860 | 2,60046217 | 0,50223510  | 7,59521974  | 0 |
| 9576  | H200015081 | <a href="#">NUDT12</a>    | 5,17738754 | 2,36956088 | 0,45767501  | 5,23234891  | 0 |
| 6651  | H200009410 | <a href="#">ZNF300</a>    | 5,17519203 | 1,70422524 | 0,32930667  | 3,22878733  | 0 |
| 7693  | H200011353 | <a href="#">SGOL1</a>     | 5,17498422 | 3,00119804 | 0,57994342  | 7,40488310  | 0 |
| 4908  | H200006576 | <a href="#">RNF144</a>    | 5,17287551 | 1,84719759 | 0,35709299  | 3,67452508  | 0 |
| 6980  | H200010115 | <a href="#">NSUN3</a>     | 5,16696804 | 2,42393977 | 0,46912227  | 5,62307779  | 0 |
| 2833  | H200003639 | <a href="#">DPAGT1</a>    | 5,16535265 | 2,51081677 | 0,48608816  | 5,31700607  | 0 |
| 5275  | H200007016 | <a href="#">ANKIB1</a>    | 5,16437273 | 2,00693426 | 0,38861143  | 4,10138923  | 0 |
| 7980  | H200011780 | <a href="#">SLC30A3</a>   | 5,16144654 | 2,55992126 | 0,49596973  | 5,52423124  | 0 |
| 7439  | H200010927 | <a href="#">LMAN1L</a>    | 5,15387125 | 3,26011781 | 0,63255709  | 15,90486668 | 0 |
| 7445  | H200010943 | <a href="#">DDX3Y</a>     | 5,15059916 | 1,93790506 | 0,37624847  | 3,63021045  | 0 |
| 3668  | H200004827 | <a href="#">LOC145783</a> | 5,14720838 | 2,87939012 | 0,55940811  | 6,88120588  | 0 |
| 5610  | H200007596 | <a href="#">ZNF446</a>    | 5,14550048 | 2,17610836 | 0,42291481  | 4,50028103  | 0 |
| 8414  | H200012673 | <a href="#">RC3H1</a>     | 5,14416868 | 2,43147701 | 0,47266666  | 5,67927103  | 0 |
| 5584  | H200007549 | <a href="#">LIM2</a>      | 5,14416746 | 2,28384492 | 0,44396784  | 4,37133505  | 0 |
| 10975 | H200018683 | <a href="#">KIAA0232</a>  | 5,13862054 | 2,17707721 | 0,42366958  | 4,55377596  | 0 |
| 6723  | H200009543 | <a href="#">VPS13C</a>    | 5,13776561 | 2,30740574 | 0,44910685  | 4,78181499  | 0 |
| 10993 | H200018797 | <a href="#">ARSD</a>      | 5,13192815 | 2,18176689 | 0,42513590  | 4,68273587  | 0 |
| 4156  | H200005561 | <a href="#">GAS1</a>      | 5,13005082 | 3,21230202 | 0,62617353  | 10,79497691 | 0 |
| 3894  | H200005154 | <a href="#">RABGAP1</a>   | 5,12942202 | 1,22779727 | 0,23936367  | 2,30892238  | 0 |
| 6042  | H200008223 | <a href="#">TMEM41B</a>   | 5,12880477 | 1,64682672 | 0,32109366  | 3,09833743  | 0 |
| 7934  | H200011714 | <a href="#">SOCS2</a>     | 5,12688301 | 2,58512458 | 0,50422929  | 5,51259429  | 0 |
| 11844 | H200021203 | <a href="#">ANKFY1</a>    | 5,12527754 | 1,65886726 | 0,32366389  | 3,17096772  | 0 |
| 4979  | H200006655 | <a href="#">KIAA0232</a>  | 5,12066793 | 1,94547454 | 0,37992593  | 3,72164065  | 0 |
| 9204  | H200014279 | <a href="#">SNAP23</a>    | 5,11788953 | 1,78897555 | 0,34955337  | 3,48359940  | 0 |
| 8765  | H200013508 | <a href="#">HLA-A</a>     | 5,11761971 | 2,74001133 | 0,53540737  | 6,24337360  | 0 |
| 11334 | H200019564 | <a href="#">KRTAP4-2</a>  | 5,11661283 | 2,40380116 | 0,46980322  | 5,65889020  | 0 |
| 6133  | H200008372 | <a href="#">COL10A1</a>   | 5,11646913 | 2,75214256 | 0,53789879  | 7,02909279  | 0 |
| 10780 | H200018014 | <a href="#">NEU3</a>      | 5,11596946 | 1,71020670 | 0,33428790  | 3,42016578  | 0 |
| 10515 | H200017394 | <a href="#">PCDH11</a>    | 5,11549709 | 1,50923621 | 0,29503217  | 2,86849445  | 0 |
| 11762 | H200020977 | <a href="#">VEGFA</a>     | 5,11113237 | 1,21544482 | 0,23780343  | 2,29039346  | 0 |
| 1137  | H200001357 | <a href="#">INSIG2</a>    | 5,10874864 | 2,27276817 | 0,44487767  | 5,31042318  | 0 |
| 7551  | H200011097 | <a href="#">ZNF354A</a>   | 5,10595180 | 2,34714991 | 0,45968901  | 5,30941058  | 0 |
| 10859 | H200018230 | <a href="#">SLC28A3</a>   | 5,10506931 | 2,30537637 | 0,45158571  | 5,06195204  | 0 |
| 8355  | H200012538 | <a href="#">NRG3</a>      | 5,10355227 | 1,65855369 | 0,32498025  | 3,12047596  | 0 |
| 8327  | H200012478 | <a href="#">C2orf141</a>  | 5,10333903 | 2,89433849 | 0,56714604  | 10,64734186 | 0 |
| 7753  | H200011458 | <a href="#">KIAA1799</a>  | 5,10122481 | 1,82626093 | 0,35800440  | 3,35517402  | 0 |
| 9287  | H200014427 | <a href="#">LONRF1</a>    | 5,09963548 | 2,21327769 | 0,43400704  | 4,75782271  | 0 |
| 7215  | H200010498 | <a href="#">TMS6F1</a>    | 5,09956344 | 2,49062443 | 0,48839954  | 4,79632114  | 0 |
| 949   | H200001117 | <a href="#">SACM1L</a>    | 5,09834628 | 1,87380513 | 0,36753195  | 3,45172147  | 0 |
| 6611  | H200009343 | <a href="#">IBRDC1</a>    | 5,09709058 | 2,88355767 | 0,56572620  | 7,96886424  | 0 |
| 9858  | H200015647 | <a href="#">IGF1R</a>     | 5,09378932 | 1,32995539 | 0,26109352  | 2,50394485  | 0 |



|       |            |                           |             |            |            |             |   |
|-------|------------|---------------------------|-------------|------------|------------|-------------|---|
| 11265 | H200019392 | <a href="#">FLJ25371</a>  | 5.09332886  | 1.38977213 | 0.27286126 | 2.57941118  | 0 |
| 8086  | H200011989 | <a href="#">KNS2</a>      | 5.09209762  | 2.48703381 | 0.48841047 | 5.79734243  | 0 |
| 4097  | H200005475 | <a href="#">PIGK</a>      | 5.09051933  | 2.52345957 | 0.49571751 | 5.24927878  | 0 |
| 5134  | H200006845 | <a href="#">PF4</a>       | 5.08918415  | 2.78272259 | 0.54679149 | 6.47486817  | 0 |
| 10637 | H200017612 | <a href="#">DOCK5</a>     | 5.08909547  | 1.88491462 | 0.37038303 | 3.83372011  | 0 |
| 7288  | H200010605 | <a href="#">USP49</a>     | 5.08465241  | 1.87963144 | 0.36966764 | 3.27591144  | 0 |
| 7382  | H200010772 | <a href="#">GFR160</a>    | 5.08362267  | 2.84903148 | 0.56043331 | 5.78182206  | 0 |
| 4013  | H200005337 | <a href="#">ROCK2</a>     | 5.07986687  | 1.27705557 | 0.25139548 | 2.44837499  | 0 |
| 3261  | H200004233 | <a href="#">MCTP2</a>     | 5.07914734  | 2.34764256 | 0.46221194 | 5.30370164  | 0 |
| 11703 | H200020712 | <a href="#">ZNF85</a>     | 5.07625109  | 2.70660419 | 0.53318958 | 7.81137140  | 0 |
| 3852  | H200005097 | <a href="#">NKX2-5</a>    | 5.07601057  | 1.30165170 | 0.25643203 | 2.41591378  | 0 |
| 8792  | H200013576 | <a href="#">SLC36A1</a>   | 5.07092058  | 2.29498894 | 0.45257836 | 5.18505076  | 0 |
| 11559 | H200020222 | <a href="#">MAG</a>       | 5.06585183  | 2.80049238 | 0.55281766 | 7.35369557  | 0 |
| 10754 | H200017949 | <a href="#">FNBP1</a>     | 5.06572640  | 1.35831483 | 0.26813821 | 2.62281277  | 0 |
| 11778 | H200021022 | <a href="#">ATP8B1</a>    | 5.06100371  | 2.32007953 | 0.45842281 | 5.35030247  | 0 |
| 11592 | H200020321 | <a href="#">ABCC5</a>     | 5.06059366  | 2.29734033 | 0.45396657 | 5.28873177  | 0 |
| 5276  | H200007017 | <a href="#">C7orf36</a>   | 5.06010078  | 1.74597570 | 0.34504761 | 3.14591712  | 0 |
| 11726 | H200020820 | <a href="#">OR7E5P</a>    | 5.05877512  | 2.22426398 | 0.43968430 | 4.87255350  | 0 |
| 8130  | H200012082 | <a href="#">SPG20</a>     | 5.05775739  | 1.30812361 | 0.25863708 | 2.46198600  | 0 |
| 11306 | H200019485 | <a href="#">TM2D1</a>     | 5.05347414  | 1.96635830 | 0.38911019 | 3.86769550  | 0 |
| 3817  | H200005045 | <a href="#">INPP5F</a>    | 5.05293431  | 1.54795316 | 0.30634738 | 2.95035404  | 0 |
| 9136  | H200014156 | <a href="#">CLEC7A</a>    | 5.05008317  | 2.27321395 | 0.45013396 | 4.56526241  | 0 |
| 8394  | H200012623 | <a href="#">HOXB5</a>     | 5.04987506  | 1.49667008 | 0.29637765 | 2.94863507  | 0 |
| 10192 | H200016554 | <a href="#">COMMD2</a>    | 5.04858879  | 1.68614285 | 0.33398300 | 3.10704133  | 0 |
| 5283  | H200007025 | <a href="#">F8A1</a>      | 5.04689723  | 1.71174519 | 0.33916783 | 3.28179119  | 0 |
| 9415  | H200014725 | <a href="#">PLAGL1</a>    | 5.04673903  | 2.50013071 | 0.49539528 | 5.72262004  | 0 |
| 8135  | H200012087 | <a href="#">NR112</a>     | 5.04619724  | 2.52616345 | 0.50060735 | 6.15761557  | 0 |
| 3282  | H200004263 | <a href="#">LOC152485</a> | 5.04618732  | 2.08542160 | 0.41326678 | 4.03222546  | 0 |
| 5259  | H200006999 | <a href="#">PIK3R4</a>    | 5.04568779  | 1.31751598 | 0.26111722 | 2.57968942  | 0 |
| 4001  | H200005317 | <a href="#">TMEM112</a>   | 5.04433688  | 2.58090386 | 0.51164383 | 5.78371217  | 0 |
| 3623  | H200004765 | <a href="#">BDKRB2</a>    | 5.04419281  | 2.43894792 | 0.48351600 | 5.47878704  | 0 |
| 3614  | H200004750 | <a href="#">LDOC1</a>     | 5.04381524  | 1.69806644 | 0.33666309 | 3.32675390  | 0 |
| 11315 | H200019503 | <a href="#">CKM</a>       | 5.04324404  | 2.07186684 | 0.41082026 | 4.60280909  | 0 |
| 11576 | H200020265 | <a href="#">KIAA1914</a>  | 5.04099726  | 1.58245135 | 0.31391633 | 2.98052716  | 0 |
| 2265  | H200002858 | <a href="#">CASP8</a>     | 5.03789983  | 2.10939514 | 0.41870526 | 4.80520761  | 0 |
| 7805  | H200011533 | <a href="#">KLF2</a>      | 5.03357083  | 2.16050900 | 0.42921995 | 4.47522683  | 0 |
| 10220 | H200016598 | <a href="#">MAPK8</a>     | 5.02765288  | 1.15475377 | 0.22968049 | 2.21939690  | 0 |
| 4902  | H200006569 | <a href="#">ITPKB</a>     | 5.02406465  | 2.24587339 | 0.44702319 | 4.58415776  | 0 |
| 5774  | H200007863 | <a href="#">COL4A5</a>    | 5.02382545  | 2.67867109 | 0.53319350 | 7.52962246  | 0 |
| 8714  | H200013382 | <a href="#">GPA33</a>     | 5.02377843  | 2.18763307 | 0.43545572 | 4.76348726  | 0 |
| 10725 | H200017887 | <a href="#">GD4</a>       | 5.02260812  | 2.58955985 | 0.51558071 | 6.79913685  | 0 |
| 7135  | H200010378 | <a href="#">IL2</a>       | 5.02226662  | 2.46620480 | 0.49105414 | 6.18150610  | 0 |
| 7642  | H200011253 | <a href="#">CMTM7</a>     | 5.02182855  | 2.51697344 | 0.50120657 | 5.60815425  | 0 |
| 9641  | H200015208 | <a href="#">KLK4</a>      | 5.02137974  | 2.67136611 | 0.53199842 | 6.53357372  | 0 |
| 5762  | H200007845 | <a href="#">GOLGA8G</a>   | 5.01968802  | 3.40414847 | 0.67815937 | 13.92605191 | 0 |
| 8787  | H200013565 | <a href="#">MAP7</a>      | 5.01965963  | 1.59703956 | 0.31815694 | 3.03846897  | 0 |
| 441   | H200000512 | <a href="#">GSTM3</a>     | 5.01919038  | 2.22221771 | 0.44274426 | 4.74322474  | 0 |
| 5455  | H200007268 | <a href="#">DPF3</a>      | 5.01336759  | 2.41327970 | 0.48136899 | 5.45331514  | 0 |
| 11274 | H200019409 | <a href="#">TLN2</a>      | 5.01172190  | 2.29466277 | 0.45785916 | 5.27327970  | 0 |
| 1175  | H200001407 | <a href="#">GPS2</a>      | 5.01141638  | 1.54297926 | 0.30789285 | 3.10042371  | 0 |
| 6237  | H200008508 | <a href="#">ELK1</a>      | 5.00735575  | 1.49366204 | 0.29829357 | 2.71838761  | 0 |
| 9542  | H200014983 | <a href="#">PRKD3</a>     | 5.00584592  | 2.15234843 | 0.42996698 | 4.54771224  | 0 |
| 11032 | H200018899 | <a href="#">PLDN</a>      | 5.00566055  | 2.45518695 | 0.49048211 | 5.31613328  | 0 |
| 10775 | H200018002 | <a href="#">KCNK13</a>    | 5.00197214  | 2.07192075 | 0.41422077 | 4.74983160  | 0 |
| 8149  | H200012107 | <a href="#">HLA-E</a>     | 5.00183764  | 2.36090421 | 0.47200737 | 5.19387921  | 0 |
| 619   | H200000727 | <a href="#">EGR4</a>      | 5.00035488  | 2.39133592 | 0.47823324 | 5.50941917  | 0 |
| 4373  | H200005914 | <a href="#">KLRC1</a>     | 4.99563560  | 2.22866480 | 0.44612237 | 4.68131090  | 0 |
| 9006  | H200013949 | <a href="#">EDG1</a>      | 4.99349456  | 3.12264660 | 0.62534295 | 13.92977932 | 0 |
| 3857  | H200005106 | <a href="#">PA2G4</a>     | 4.992394257 | 2.24123031 | 0.44887965 | 4.91909234  | 0 |
| 11040 | H200018914 | <a href="#">LOC283970</a> | 4.99211730  | 2.55120155 | 0.51104600 | 6.03751501  | 0 |
| 10326 | H200016899 | <a href="#">TAS2R8</a>    | 4.99043433  | 2.42720707 | 0.48637191 | 5.46147870  | 0 |
| 11295 | H200019453 | <a href="#">IGFBP7</a>    | 4.99029364  | 3.18479131 | 0.63819718 | 19.93481130 | 0 |
| 415   | H200000478 | <a href="#">PGC</a>       | 4.98888733  | 2.28233352 | 0.45748348 | 4.93855148  | 0 |
| 727   | H200000850 | <a href="#">FKBP10</a>    | 4.98673577  | 1.43146764 | 0.28705504 | 2.69947290  | 0 |
| 8118  | H200012067 | <a href="#">ABCD2</a>     | 4.98648144  | 2.98263373 | 0.59814396 | 11.15383966 | 0 |
| 9869  | H200015662 | <a href="#">TIA1</a>      | 4.98323256  | 1.52068502 | 0.30516036 | 2.88837301  | 0 |
| 8667  | H200013277 | <a href="#">USP49</a>     | 4.98166867  | 2.42934679 | 0.48765724 | 5.37151520  | 0 |
| 8336  | H200012498 | <a href="#">ACTR8</a>     | 4.98104106  | 2.00035968 | 0.40159470 | 4.38034491  | 0 |
| 10763 | H200017973 | <a href="#">LONP2</a>     | 4.97785583  | 2.18495654 | 0.43893528 | 4.39493977  | 0 |
| 3666  | H200004825 | <a href="#">DGKH</a>      | 4.97273649  | 1.90230611 | 0.38254714 | 3.71227963  | 0 |
| 2771  | H200003551 | <a href="#">MBD2</a>      | 4.97243467  | 2.38469002 | 0.47958197 | 5.15149880  | 0 |
| 10715 | H200017858 | <a href="#">THSD4</a>     | 4.97090002  | 2.09997232 | 0.42245314 | 4.39460291  | 0 |
| 432   | H200000498 | <a href="#">CRYAB</a>     | 4.96835377  | 2.12502019 | 0.42771113 | 4.38248903  | 0 |
| 6114  | H200008343 | <a href="#">SLC32A1</a>   | 4.96747043  | 1.93833616 | 0.39020588 | 3.57338000  | 0 |
| 11736 | H200020861 | <a href="#">MYL3</a>      | 4.95970237  | 2.25917182 | 0.45550552 | 4.81220804  | 0 |
| 5390  | H200007157 | <a href="#">SUV39H2</a>   | 4.95822449  | 2.49782194 | 0.50377347 | 6.48031905  | 0 |
| 11198 | H200019207 | <a href="#">GFR174</a>    | 4.95356427  | 2.26686858 | 0.45762373 | 5.06575903  | 0 |
| 10295 | H200016765 | <a href="#">WDR51B</a>    | 4.95096568  | 2.25636930 | 0.45574327 | 5.06021401  | 0 |
| 482   | H200000563 | <a href="#">CSF3</a>      | 4.94793955  | 1.43094045 | 0.28919926 | 2.62857469  | 0 |
| 10292 | H200016753 | <a href="#">POLI</a>      | 4.94756060  | 2.21794015 | 0.44828964 | 5.18407908  | 0 |
| 5580  | H200007539 | <a href="#">STAR4</a>     | 4.94668826  | 1.78483801 | 0.36081473 | 3.45667667  | 0 |
| 1103  | H200001312 | <a href="#">ACBD3</a>     | 4.94646891  | 1.51699496 | 0.30668240 | 2.86929779  | 0 |
| 9668  | H200015277 | <a href="#">C3orf20</a>   | 4.94561949  | 2.25384919 | 0.45572636 | 4.90211632  | 0 |
| 8266  | H200012313 | <a href="#">SPAM1</a>     | 4.94411951  | 2.20480099 | 0.44594411 | 4.92181131  | 0 |
| 7227  | H200010521 | <a href="#">RAPGEF4</a>   | 4.94083198  | 2.34510227 | 0.47463712 | 5.11955497  | 0 |
| 7045  | H200010233 | <a href="#">NKD1</a>      | 4.93791291  | 2.37495320 | 0.48096296 | 5.42073028  | 0 |
| 8881  | H200013764 | <a href="#">CILP</a>      | 4.93756596  | 2.42893881 | 0.49193040 | 5.46142765  | 0 |
| 9545  | H200014992 | <a href="#">LOC149692</a> | 4.93705638  | 2.46251998 | 0.49878304 | 5.71759563  | 0 |
| 9234  | H200014319 | <a href="#">SSTR2</a>     | 4.93624994  | 2.48538685 | 0.50349696 | 6.97835346  | 0 |
| 311   | H200000363 | <a href="#">PSMB2</a>     | 4.93620148  | 1.54593314 | 0.31318275 | 2.85075369  | 0 |
| 2424  | H200003076 | <a href="#">PBX1</a>      | 4.92655032  | 2.69539901 | 0.54711691 | 5.29502467  | 0 |

|       |            |            |            |            |            |             |   |
|-------|------------|------------|------------|------------|------------|-------------|---|
| 7638  | H200011248 | SLURP1     | 4,92404059 | 2,86186069 | 0,58120169 | 6,85879108  | 0 |
| 8547  | H200012986 | REV1L      | 4,92262028 | 2,24499798 | 0,45605752 | 4,92702337  | 0 |
| 10881 | H200018320 | SH2D3C     | 4,92243032 | 1,60274073 | 0,32559948 | 3,00106436  | 0 |
| 11199 | H200019208 | MBNL2      | 4,91739702 | 2,16149613 | 0,43956104 | 4,41479915  | 0 |
| 2550  | H200003240 | CA1        | 4,91345412 | 2,33503333 | 0,47523255 | 5,17369650  | 0 |
| 4000  | H200005316 | PGLYRP4    | 4,90905456 | 2,63858265 | 0,53749304 | 6,06532025  | 0 |
| 7189  | H200010462 | RAB1F      | 4,90623203 | 2,32041567 | 0,47295270 | 5,00007757  | 0 |
| 3496  | H200004577 | TEAD1      | 4,90469288 | 1,12969285 | 0,23032897 | 2,20158253  | 0 |
| 6916  | H200009979 | NFKBIZ     | 4,90344972 | 2,11194011 | 0,43070496 | 4,49035451  | 0 |
| 11507 | H200020061 | TP53       | 4,90135838 | 2,06590187 | 0,42149578 | 4,18703860  | 0 |
| 11174 | H200019156 | EGR1       | 4,89931254 | 2,14743676 | 0,43831389 | 4,27111794  | 0 |
| 6174  | H200008428 | LPP        | 4,89799859 | 1,88422422 | 0,38469268 | 3,57440535  | 0 |
| 10316 | H200016853 | EPHB1      | 4,89547967 | 2,31840190 | 0,47358013 | 5,50917535  | 0 |
| 4025  | H200005357 | SLC6A16    | 4,89481474 | 2,54029954 | 0,51897767 | 5,87475153  | 0 |
| 10196 | H200016560 | C14orf104  | 4,89358833 | 2,00788052 | 0,41030842 | 3,94414761  | 0 |
| 2280  | H200002880 | 06.mar     | 4,89093496 | 1,82923815 | 0,37400582 | 3,61581031  | 0 |
| 1068  | H200001267 | DKFZP564O0 | 4,88300901 | 2,63543518 | 0,53971540 | 7,81095660  | 0 |
| 9120  | H200014122 | RNF103     | 4,88174639 | 1,20199628 | 0,24622260 | 2,31229877  | 0 |
| 6828  | H200009764 | MAX        | 4,87987207 | 2,58004735 | 0,52871209 | 6,55283658  | 0 |
| 11396 | H200019714 | CPM        | 4,87876940 | 2,14328841 | 0,43930923 | 4,55542393  | 0 |
| 1187  | H200001421 | BTBD6      | 4,87589393 | 1,66396182 | 0,34126292 | 3,29180620  | 0 |
| 8382  | H200012588 | TMOD2      | 4,87451633 | 1,89952558 | 0,38968494 | 3,99195743  | 0 |
| 2330  | H200002945 | RBMS2      | 4,87052230 | 2,19046515 | 0,44973927 | 4,35600562  | 0 |
| 8946  | H200013862 | SH3KBP1    | 4,86494528 | 1,06190058 | 0,21827596 | 2,10199141  | 0 |
| 3281  | H200004262 | FYB        | 4,86356510 | 1,34149442 | 0,27582532 | 2,49983127  | 0 |
| 11070 | H200018991 | HSPA14     | 4,85649806 | 3,16947037 | 0,65262466 | 6,29683079  | 0 |
| 2889  | H200003717 | DJSC1      | 4,85642519 | 2,36461636 | 0,48690472 | 5,02397930  | 0 |
| 9978  | H200015949 | OR12D3     | 4,85480388 | 1,98009448 | 0,40786292 | 4,13776288  | 0 |
| 9758  | H200015475 | ISLR2      | 4,85435055 | 2,36001656 | 0,48616525 | 5,13272357  | 0 |
| 7601  | H200011184 | NTN4       | 4,85363370 | 1,84191580 | 0,37949213 | 3,84705731  | 0 |
| 8959  | H200013882 | PAK3       | 4,85152574 | 2,48834256 | 0,51289897 | 5,40052145  | 0 |
| 6829  | H200009772 | SLC24A3    | 4,85053019 | 2,41239579 | 0,49734683 | 5,15947931  | 0 |
| 11240 | H200019337 | S100PBP    | 4,84949438 | 2,51581503 | 0,51877883 | 5,66617554  | 0 |
| 11371 | H200019676 | LRP11      | 4,84792306 | 1,75472443 | 0,36195385 | 3,56793294  | 0 |
| 8024  | H200011865 | CCR8       | 4,84774242 | 2,39594210 | 0,49423874 | 5,47091142  | 0 |
| 11142 | H200019104 | EIF2C2     | 4,84618598 | 1,49571769 | 0,30863811 | 2,91076621  | 0 |
| 9397  | H200014685 | SEZL6      | 4,84591764 | 2,87952894 | 0,59421747 | 12,80958855 | 0 |
| 6930  | H200010010 | CCDC40     | 4,84145685 | 2,41353213 | 0,49851361 | 5,49902947  | 0 |
| 9625  | H200015168 | SOX7       | 4,83824144 | 1,91905734 | 0,39664357 | 3,89684485  | 0 |
| 7652  | H200011277 | CXCL11     | 4,83588340 | 2,62425874 | 0,54266378 | 6,03254993  | 0 |
| 3555  | H200004664 | C12orf53   | 4,83510863 | 2,02975433 | 0,41979498 | 4,32963311  | 0 |
| 8334  | H200012494 | SCN8A      | 4,83260450 | 2,01323621 | 0,41659445 | 3,85761094  | 0 |
| 8109  | H200012044 | PADI4      | 4,83071382 | 2,34203571 | 0,48482187 | 6,00505304  | 0 |
| 8782  | H200013558 | ZFP64      | 4,83055559 | 2,01331807 | 0,41678810 | 4,12355611  | 0 |
| 9496  | H200014876 | CARD6      | 4,83027870 | 1,87169219 | 0,38749155 | 3,80735928  | 0 |
| 8652  | H200013236 | PIGA       | 4,82678242 | 2,33150789 | 0,48303563 | 5,21374302  | 0 |
| 2125  | H200002672 | CCDC14     | 4,82478614 | 1,31030189 | 0,27157720 | 2,41589393  | 0 |
| 6448  | H200008881 | C20orf177  | 4,82458960 | 1,41214109 | 0,29269662 | 2,71031643  | 0 |
| 4091  | H200005468 | KCTD5      | 4,82441241 | 1,57887807 | 0,32726847 | 2,95381679  | 0 |
| 2404  | H200003049 | NELL1      | 4,82356777 | 1,94155862 | 0,40251505 | 4,23661356  | 0 |
| 10777 | H200018006 | PBOV1      | 4,82312756 | 2,15199553 | 0,44618259 | 4,54074087  | 0 |
| 9995  | H200016077 | GRM6       | 4,82091204 | 1,64838163 | 0,34192319 | 3,27201147  | 0 |
| 4581  | H200006183 | APOD       | 4,82019194 | 2,01998370 | 0,41906707 | 4,93600641  | 0 |
| 11447 | H200019897 | UGT3A1     | 4,81918420 | 2,25605375 | 0,46814018 | 4,76167054  | 0 |
| 9396  | H200014684 | LUZP2      | 4,81525435 | 2,29874681 | 0,47738845 | 4,91206349  | 0 |
| 2929  | H200003771 | CYB5D1     | 4,81371381 | 2,62858279 | 0,54660129 | 5,07686100  | 0 |
| 8965  | H200013890 | C6orf12    | 4,81303617 | 2,21687623 | 0,46059829 | 4,77882212  | 0 |
| 7641  | H200011252 | ARL6IP4    | 4,80975599 | 2,34587395 | 0,48773242 | 4,86912699  | 0 |
| 9650  | H200015231 | ADAM12     | 4,80831071 | 3,00886025 | 0,62576244 | 16,01704790 | 0 |
| 9485  | H200014846 | LRRRC8B    | 4,80760620 | 2,88413658 | 0,59991115 | 11,23226680 | 0 |
| 3656  | H200004812 | MANEA      | 4,80702308 | 1,56484022 | 0,32553208 | 2,97367810  | 0 |
| 8905  | H200013794 | CEP57      | 4,80564660 | 1,78932101 | 0,37233720 | 3,29243106  | 0 |
| 9687  | H200015333 | RDH11      | 4,80393102 | 2,24901481 | 0,46816135 | 4,98403247  | 0 |
| 5140  | H200006852 | CD160      | 4,79625207 | 2,35365487 | 0,49072793 | 5,03639676  | 0 |
| 10755 | H200017951 | STK11      | 4,79599617 | 2,13249175 | 0,44464000 | 3,74506667  | 0 |
| 4726  | H200006356 | DNASE1L1   | 4,79509561 | 1,45676118 | 0,30380232 | 2,58614045  | 0 |
| 10275 | H200016708 | C9orf39    | 4,79437718 | 1,63304247 | 0,34061619 | 3,25891341  | 0 |
| 8390  | H200012608 | CLEC5A     | 4,78657405 | 2,03015668 | 0,42413565 | 4,42138605  | 0 |
| 5869  | H200008002 | CHPT1      | 4,78613756 | 1,96005278 | 0,40952705 | 3,86092819  | 0 |
| 10237 | H200016620 | MRPS6      | 4,78583747 | 2,33121132 | 0,48710625 | 4,91365636  | 0 |
| 10972 | H200018673 | PDLIM5     | 4,78512680 | 2,23137577 | 0,46631487 | 4,90084582  | 0 |
| 487   | H200000570 | CXCL10     | 4,78389680 | 2,17671389 | 0,45500854 | 4,90593253  | 0 |
| 5971  | H200008122 | B3GNT2     | 4,78376441 | 1,24206412 | 0,25964157 | 2,36820317  | 0 |
| 6729  | H200009557 | CUGBP1     | 4,78327917 | 2,30752506 | 0,48241488 | 5,28948088  | 0 |
| 1779  | H200002201 | ACTR3B     | 4,78303703 | 1,45803431 | 0,30483442 | 2,70001612  | 0 |
| 10444 | H200017244 | PYCR2      | 4,77707408 | 2,17053484 | 0,45436491 | 4,22992410  | 0 |
| 8952  | H200013872 | PER2       | 4,77694527 | 2,01912742 | 0,42268171 | 4,33043727  | 0 |
| 9008  | H200013952 | TRAK2      | 4,77282507 | 1,85830637 | 0,38935145 | 3,86837822  | 0 |
| 5983  | H200008137 | DPYSL2     | 4,77135444 | 1,15150399 | 0,24133692 | 2,21245923  | 0 |
| 4055  | H200005403 | HTRA3      | 4,77119693 | 2,32912423 | 0,48816351 | 5,14251525  | 0 |
| 5211  | H200006939 | CXCL16     | 4,77045976 | 2,01082642 | 0,42151627 | 4,15661657  | 0 |
| 3099  | H200003999 | RPS6KC1    | 4,76890289 | 1,56557387 | 0,32828806 | 2,95097061  | 0 |
| 3361  | H200004390 | DMC1       | 4,76808704 | 2,46864456 | 0,51774318 | 5,62138198  | 0 |
| 11848 | H200021211 | ARID2      | 4,76153801 | 2,19186567 | 0,46032725 | 4,99102624  | 0 |
| 9798  | H200015557 | SMARCC2    | 4,76059181 | 1,64257874 | 0,34503667 | 3,12012017  | 0 |
| 6921  | H200009988 | NFIA       | 4,76024636 | 2,15334455 | 0,45235990 | 4,74710419  | 0 |
| 3342  | H200004352 | HBB        | 4,75982348 | 1,61026111 | 0,33830269 | 3,13110498  | 0 |
| 11722 | H200020805 | CES7       | 4,75144694 | 2,02338181 | 0,42584540 | 4,15847125  | 0 |
| 9482  | H200014843 | COBE1      | 4,75070388 | 2,21272784 | 0,46576842 | 4,89696929  | 0 |
| 110   | H200000128 | RAB5C      | 4,74958965 | 1,46231831 | 0,30788309 | 2,80110179  | 0 |
| 5954  | H200008100 | ZNF644     | 4,74736453 | 2,27748339 | 0,47973636 | 4,61131096  | 0 |



|       |            |                           |            |            |             |             |   |
|-------|------------|---------------------------|------------|------------|-------------|-------------|---|
| 2740  | H200003511 | <a href="#">RAB27B</a>    | 4,74720529 | 2,19557911 | 0,46249930  | 4,82105628  | 0 |
| 1405  | H200001707 | <a href="#">CCDC49</a>    | 4,74709483 | 1,60152457 | 0,33736941  | 2,82883327  | 0 |
| 3895  | H200005155 | <a href="#">TMEM142A</a>  | 4,74685097 | 1,72112918 | 0,36258336  | 3,09142820  | 0 |
| 11546 | H200020153 | <a href="#">MKRN1</a>     | 4,74605011 | 1,76446664 | 0,37177581  | 3,48006291  | 0 |
| 10826 | H200018165 | <a href="#">OR51E2</a>    | 4,74552717 | 2,07373332 | 0,43698692  | 4,34791459  | 0 |
| 10604 | H200017557 | <a href="#">CHML</a>      | 4,74313939 | 1,80371102 | 0,38027789  | 3,70069097  | 0 |
| 6315  | H200008631 | <a href="#">KPNA5</a>     | 4,74213997 | 1,61998785 | 0,34161536  | 3,24704618  | 0 |
| 2526  | H200003209 | <a href="#">XYLT1</a>     | 4,73991695 | 2,51498210 | 0,53059624  | 6,64590234  | 0 |
| 8644  | H200013218 | <a href="#">ALOX12B</a>   | 4,73188562 | 2,08029354 | 0,43963310  | 4,43808550  | 0 |
| 6480  | H200008964 | <a href="#">C16orf52</a>  | 4,73135810 | 2,20754795 | 0,466657807 | 4,54367533  | 0 |
| 10967 | H200018630 | <a href="#">NLN</a>       | 4,72899822 | 1,95716404 | 0,41386441  | 3,90919420  | 0 |
| 496   | H200000581 | <a href="#">RPN1</a>      | 4,72671451 | 1,34926126 | 0,28554536  | 2,41127258  | 0 |
| 11712 | H200020761 | <a href="#">C14orf81</a>  | 4,72629693 | 2,06857117 | 0,43767271  | 4,60684659  | 0 |
| 3037  | H200003917 | <a href="#">GOLPH3L</a>   | 4,72420595 | 1,33792028 | 0,28320532  | 2,59610618  | 0 |
| 9928  | H200015792 | <a href="#">SLC17A6</a>   | 4,71893355 | 2,11631324 | 0,44847278  | 4,46799485  | 0 |
| 10557 | H200017489 | <a href="#">ZNF223</a>    | 4,71826789 | 1,48335967 | 0,31438649  | 2,86172061  | 0 |
| 8808  | H200013621 | <a href="#">OPA1</a>      | 4,71641395 | 1,15545091 | 0,24498505  | 2,22143330  | 0 |
| 956   | H200001126 | <a href="#">GNE</a>       | 4,71526871 | 1,50339414 | 0,31883531  | 3,04708555  | 0 |
| 6665  | H200009432 | <a href="#">NUBPL</a>     | 4,71423309 | 2,05078419 | 0,43501968  | 4,89318467  | 0 |
| 1139  | H200001359 | <a href="#">C2orf30</a>   | 4,70990122 | 1,67285306 | 0,35517795  | 3,00806110  | 0 |
| 11584 | H200020289 | <a href="#">SORCS3</a>    | 4,70938781 | 2,47062213 | 0,52461641  | 5,83838183  | 0 |
| 10793 | H200018087 | <a href="#">CDH20</a>     | 4,70652680 | 2,11018254 | 0,44835239  | 4,67483545  | 0 |
| 10662 | H200017720 | <a href="#">FLJ25006</a>  | 4,70319434 | 2,83689949 | 0,60318568  | 10,17290603 | 0 |
| 10319 | H200016882 | <a href="#">HR</a>        | 4,70234912 | 1,92697849 | 0,40979060  | 3,90276597  | 0 |
| 10438 | H200017236 | <a href="#">LIMK2</a>     | 4,69465111 | 1,51617970 | 0,32295897  | 3,06409410  | 0 |
| 8025  | H200011872 | <a href="#">NRG2</a>      | 4,69215420 | 2,11572221 | 0,45090637  | 4,45067230  | 0 |
| 7852  | H200011595 | <a href="#">PIGN</a>      | 4,69158200 | 1,73214019 | 0,36920173  | 3,26829670  | 0 |
| 9829  | H200015600 | <a href="#">KIAA0143</a>  | 4,69138920 | 2,36038271 | 0,50313087  | 5,15755037  | 0 |
| 8383  | H200012589 | <a href="#">SYN3</a>      | 4,68586233 | 2,91238781 | 0,62152654  | 16,49109087 | 0 |
| 7047  | H200010238 | <a href="#">THBS1</a>     | 4,68321052 | 1,93760407 | 0,41373414  | 3,82277005  | 0 |
| 1072  | H200001271 | <a href="#">FLJ32745</a>  | 4,68212368 | 1,95128550 | 0,41675223  | 4,18029406  | 0 |
| 10458 | H200017268 | <a href="#">DOPEY1</a>    | 4,67832471 | 2,22037792 | 0,47460962  | 4,60584039  | 0 |
| 10988 | H200018743 | <a href="#">TCAM1</a>     | 4,67421701 | 2,11798241 | 0,45312026  | 4,41918936  | 0 |
| 8748  | H200013461 | <a href="#">C19orf6</a>   | 4,67316674 | 2,16852422 | 0,46403742  | 3,88257879  | 0 |
| 11155 | H200019121 | <a href="#">RAB11FIP1</a> | 4,66952134 | 2,46745963 | 0,52841811  | 5,86005572  | 0 |
| 5685  | H200007731 | <a href="#">SNTG1</a>     | 4,66915118 | 2,28326187 | 0,48901005  | 4,82863110  | 0 |
| 6137  | H200000380 | <a href="#">RAB20</a>     | 4,66787467 | 2,51257813 | 0,53827026  | 4,85007738  | 0 |
| 4897  | H200006564 | <a href="#">FCGR2B</a>    | 4,66677236 | 2,22778664 | 0,47737204  | 4,95981602  | 0 |
| 5227  | H200009693 | <a href="#">SLC35D1</a>   | 4,66600235 | 2,10689201 | 0,45154114  | 4,20256687  | 0 |
| 3720  | H200004908 | <a href="#">C9orf52</a>   | 4,66415382 | 2,30330693 | 0,49383168  | 5,04704745  | 0 |
| 10215 | H200016592 | <a href="#">FLJ14803</a>  | 4,66304623 | 2,42378147 | 0,51978500  | 4,80673509  | 0 |
| 9969  | H200015879 | <a href="#">HIST1H3J</a>  | 4,66229303 | 2,20517860 | 0,47298155  | 4,63159439  | 0 |
| 2855  | H200003664 | <a href="#">C2orf100</a>  | 4,66159017 | 2,10980136 | 0,45259263  | 3,44605243  | 0 |
| 10118 | H200016399 | <a href="#">CCDC34</a>    | 4,66089764 | 2,08114040 | 0,44651064  | 4,42138278  | 0 |
| 8580  | H200013053 | <a href="#">SLC4A7</a>    | 4,65946067 | 1,75098792 | 0,37579197  | 3,21580929  | 0 |
| 6615  | H200009353 | <a href="#">TMEM134</a>   | 4,65804001 | 1,19517227 | 0,25658265  | 2,19811573  | 0 |
| 11850 | H200021215 | <a href="#">BTBD8</a>     | 4,65748418 | 2,49757979 | 0,53625084  | 5,64124351  | 0 |
| 3811  | H200005033 | <a href="#">MAFF</a>      | 4,65740302 | 1,43568381 | 0,30825844  | 2,79246101  | 0 |
| 9490  | H200014857 | <a href="#">EPN3</a>      | 4,65387097 | 2,09803453 | 0,45081493  | 4,36520729  | 0 |
| 2760  | H200003539 | <a href="#">C16orf30</a>  | 4,65332378 | 2,20982230 | 0,47489115  | 4,72569786  | 0 |
| 6070  | H200008279 | <a href="#">ZBTB34</a>    | 4,65257437 | 1,42416545 | 0,30610267  | 2,47824738  | 0 |
| 5927  | H200008069 | <a href="#">XPO7</a>      | 4,65164474 | 1,25726966 | 0,27028497  | 2,39191456  | 0 |
| 7882  | H200011646 | <a href="#">KCTD12</a>    | 4,65116547 | 2,33733883 | 0,50252756  | 5,92717421  | 0 |
| 5566  | H200007509 | <a href="#">P53AIP1</a>   | 4,64904731 | 1,93641295 | 0,41651823  | 3,86467526  | 0 |
| 5619  | H200007614 | <a href="#">LOC153682</a> | 4,64711573 | 1,30323424 | 0,28043938  | 2,44526185  | 0 |
| 10324 | H200016897 | <a href="#">SSBP1</a>     | 4,64422052 | 2,15074965 | 0,46310240  | 4,74660450  | 0 |
| 10947 | H200018575 | <a href="#">RAVER2</a>    | 4,64243533 | 2,53815100 | 0,54672835  | 7,27007136  | 0 |
| 9246  | H200014344 | <a href="#">EBI3</a>      | 4,64027064 | 1,52011560 | 0,32759201  | 2,69011903  | 0 |
| 3000  | H200003867 | <a href="#">C10orf46</a>  | 4,63997073 | 1,58170648 | 0,34088717  | 2,84794531  | 0 |
| 10628 | H200017598 | <a href="#">MAS1L</a>     | 4,63821561 | 1,88936986 | 0,40734843  | 4,12271970  | 0 |
| 10854 | H200018219 | <a href="#">HMGBl</a>     | 4,63537362 | 2,44637460 | 0,52776212  | 6,42226867  | 0 |
| 3103  | H200004003 | <a href="#">CCNE2</a>     | 4,63535436 | 2,24700467 | 0,48475359  | 3,95702626  | 0 |
| 7079  | H200010290 | <a href="#">MSL3L1</a>    | 4,63508582 | 2,43807922 | 0,52600520  | 4,85468703  | 0 |
| 10768 | H200017985 | <a href="#">SERHL2</a>    | 4,63430602 | 1,85024321 | 0,39924925  | 3,80304732  | 0 |
| 11851 | H200021222 | <a href="#">C15orf27</a>  | 4,63222052 | 1,93687728 | 0,41813149  | 4,04231812  | 0 |
| 10007 | H200016141 | <a href="#">ABHD5</a>     | 4,62930983 | 2,22105049 | 0,47978005  | 4,70652617  | 0 |
| 3098  | H200003997 | <a href="#">GFPT2</a>     | 4,62823897 | 2,22387615 | 0,48050158  | 3,61757785  | 0 |
| 5881  | H200008015 | <a href="#">PTPRJ</a>     | 4,62779456 | 1,99514053 | 0,43112124  | 4,10118408  | 0 |
| 3102  | H200004002 | <a href="#">TRIM5</a>     | 4,62754067 | 1,88096595 | 0,40647205  | 3,51539383  | 0 |
| 6696  | H200009492 | <a href="#">C7orf28A</a>  | 4,62638774 | 2,10133740 | 0,45420694  | 4,51079287  | 0 |
| 10198 | H200016562 | <a href="#">SLC22A8</a>   | 4,62592460 | 2,12497771 | 0,45936281  | 5,20802424  | 0 |
| 6818  | H200009733 | <a href="#">ALMS1</a>     | 4,62366585 | 2,38136024 | 0,51503727  | 5,19777611  | 0 |
| 2411  | H200003059 | <a href="#">TCF12</a>     | 4,62267752 | 1,90007925 | 0,41103435  | 3,37146635  | 0 |
| 5242  | H200006980 | <a href="#">SELL</a>      | 4,61909686 | 1,99913906 | 0,43279869  | 4,06937072  | 0 |
| 10891 | H200018349 | <a href="#">RAD50</a>     | 4,61699537 | 2,21952714 | 0,48072977  | 4,95989142  | 0 |
| 9780  | H200015523 | <a href="#">HTR7P</a>     | 4,61698449 | 1,38257332 | 0,29945375  | 2,63232836  | 0 |
| 10008 | H200016142 | <a href="#">LOC221272</a> | 4,61434681 | 1,96290505 | 0,42539175  | 4,31091094  | 0 |
| 7659  | H200011290 | <a href="#">CAP1</a>      | 4,61328764 | 1,68547104 | 0,36535139  | 3,14775818  | 0 |
| 5458  | H200007272 | <a href="#">CHRNA10</a>   | 4,60874874 | 2,13246165 | 0,46269861  | 4,57081440  | 0 |
| 7917  | H200011694 | <a href="#">EXOC6</a>     | 4,60826575 | 1,96601737 | 0,42662847  | 4,13463093  | 0 |
| 5583  | H200007548 | <a href="#">RFX3</a>      | 4,60595345 | 2,74366318 | 0,59656757  | 5,94483862  | 0 |
| 6135  | H200008375 | <a href="#">ANK3</a>      | 4,60578350 | 2,90374260 | 0,63045573  | 12,86062598 | 0 |
| 5270  | H200007010 | <a href="#">COL15A1</a>   | 4,60265569 | 2,12583191 | 0,46187072  | 4,48795966  | 0 |
| 8877  | H200013757 | <a href="#">BSND</a>      | 4,60146483 | 1,52318309 | 0,33102135  | 2,68186496  | 0 |
| 8659  | H200013257 | <a href="#">PCDH21</a>    | 4,59815735 | 1,33723720 | 0,29082023  | 2,52323383  | 0 |
| 10183 | H200016534 | <a href="#">NDE1</a>      | 4,59671944 | 1,45676287 | 0,31691359  | 2,67639065  | 0 |
| 2520  | H200003201 | <a href="#">NFTN</a>      | 4,59550189 | 1,84931698 | 0,40241894  | 3,78976569  | 0 |
| 1725  | H200002110 | <a href="#">ANKRD17</a>   | 4,59352101 | 2,09203376 | 0,45543141  | 3,89056288  | 0 |
| 7621  | H200011213 | <a href="#">ALG10</a>     | 4,59307986 | 2,36619201 | 0,51516457  | 5,43928874  | 0 |
| 6026  | H200008195 | <a href="#">DVL3</a>      | 4,59300560 | 1,63847028 | 0,35673161  | 3,07692033  | 0 |
| 10054 | H200016247 | <a href="#">LRRRC62</a>   | 4,59205998 | 2,43863465 | 0,53105462  | 6,14496306  | 0 |

|       |            |              |            |            |            |             |   |
|-------|------------|--------------|------------|------------|------------|-------------|---|
| 11845 | H200021206 | OPA1         | 4,59179634 | 2,21991110 | 0,48345156 | 4,73041275  | 0 |
| 10825 | H200018162 | IDS          | 4,58730613 | 1,09475020 | 0,23864773 | 2,10334701  | 0 |
| 3434  | H200004491 | OSGIN2       | 4,58595286 | 2,87611460 | 0,62715747 | 10,21584050 | 0 |
| 10971 | H200018654 | CXorf45      | 4,58462544 | 2,12333455 | 0,46314243 | 4,61693954  | 0 |
| 11338 | H200019573 | PAIP2        | 4,58336481 | 2,14613994 | 0,46824550 | 4,54931575  | 0 |
| 2763  | H200003542 | ELOVL1       | 4,58174584 | 1,41122199 | 0,30800966 | 2,77288395  | 0 |
| 9291  | H200014437 | VTI1A        | 4,57974509 | 2,14618345 | 0,46862509 | 4,44245191  | 0 |
| 1808  | H200002235 | RP11-301117. | 4,57530668 | 1,85649867 | 0,40576486 | 3,84711476  | 0 |
| 851   | H200001003 | IPO7         | 4,57430951 | 1,92528652 | 0,42089118 | 4,39470986  | 0 |
| 9525  | H200014945 | KCND2        | 4,57163098 | 2,08177626 | 0,45536839 | 4,53364940  | 0 |
| 899   | H200001058 | BAG5         | 4,57002662 | 1,91120733 | 0,41820486 | 3,94242534  | 0 |
| 9532  | H200014964 | PCDH7        | 4,56851902 | 2,53658673 | 0,55523173 | 5,87840306  | 0 |
| 5303  | H200007050 | ARHGD1B      | 4,56704654 | 1,72793676 | 0,37834884 | 3,13859388  | 0 |
| 8858  | H200013722 | CYP21A2      | 4,56579750 | 2,14545127 | 0,46989628 | 4,53327014  | 0 |
| 8594  | H200013094 | ALDH16A1     | 4,56543662 | 2,50110172 | 0,54783407 | 4,91134636  | 0 |
| 5332  | H200007085 | TSPAN8       | 4,56283575 | 1,60427163 | 0,35159531 | 3,04249493  | 0 |
| 8603  | H200013114 | HP           | 4,55722986 | 1,18070439 | 0,25908379 | 2,16520158  | 0 |
| 9983  | H200015992 | OR1D2        | 4,55717291 | 2,31622550 | 0,50825930 | 5,25572149  | 0 |
| 2738  | H200003508 | C5orf21      | 4,55442912 | 1,03545752 | 0,22735177 | 2,04565310  | 0 |
| 7137  | H200010381 | INSR         | 4,55392813 | 2,02221210 | 0,44405885 | 4,32261948  | 0 |
| 10323 | H200016895 | SSBP1        | 4,55191827 | 1,31627792 | 0,28916994 | 2,50976035  | 0 |
| 3370  | H200004399 | RFK          | 4,54906223 | 1,83991685 | 0,40446609 | 3,77271364  | 0 |
| 9999  | H200016095 | OR3A1        | 4,54684990 | 2,08236872 | 0,45798053 | 4,51550254  | 0 |
| 2981  | H200003840 | MRPS10       | 4,54491612 | 1,88741435 | 0,41528035 | 3,78961190  | 0 |
| 3084  | H200003980 | C3orf52      | 4,54046029 | 2,02721557 | 0,44647799 | 4,12569508  | 0 |
| 7455  | H200010954 | CMTM5        | 4,53986442 | 2,03659809 | 0,44860328 | 4,15225283  | 0 |
| 3456  | H200004523 | GDF8         | 4,53768762 | 1,42386183 | 0,31378578 | 2,71904748  | 0 |
| 8552  | H200012996 | SLC4A8       | 4,53743022 | 2,09775709 | 0,46232272 | 4,55136821  | 0 |
| 5830  | H200007947 | UBE1DC1      | 4,53571384 | 1,68185855 | 0,37080350 | 3,15700821  | 0 |
| 6130  | H200008369 | TRIM14       | 4,53415019 | 1,73634176 | 0,38294756 | 3,89145878  | 0 |
| 10638 | H200017614 | NOC2L        | 4,53295883 | 1,66908008 | 0,36820985 | 3,39284986  | 0 |
| 2352  | H200002974 | NLGN4Y       | 4,52696876 | 1,52933165 | 0,33782686 | 2,88355365  | 0 |
| 5459  | H200002727 | ZDHHC15      | 4,52537351 | 2,07737694 | 0,45905094 | 5,05556188  | 0 |
| 10925 | H200018511 | CDC14B       | 4,52002402 | 2,27753178 | 0,50387603 | 5,40590960  | 0 |
| 7130  | H200010372 | EPHX1        | 4,51884046 | 1,58385459 | 0,35050022 | 3,00212352  | 0 |
| 752   | H200000879 | REG1B        | 4,51872481 | 1,87599682 | 0,41516067 | 3,82072678  | 0 |
| 5058  | H200006750 | AFAP         | 4,51630788 | 1,11990179 | 0,24796843 | 2,17786424  | 0 |
| 9674  | H200015293 | YES1         | 4,51301397 | 1,93262192 | 0,42823309 | 3,99929592  | 0 |
| 3457  | H200004524 | PPAP2A       | 4,50998458 | 1,58018468 | 0,35037474 | 2,90142671  | 0 |
| 10963 | H200018606 | KCNIP3       | 4,50845525 | 2,44759899 | 0,54289083 | 7,60689756  | 0 |
| 11242 | H200019340 | USP38        | 4,50401417 | 1,41034971 | 0,31313172 | 2,76551636  | 0 |
| 6763  | H200009625 | ADH6         | 4,49658132 | 2,04954730 | 0,45580123 | 4,17143260  | 0 |
| 9597  | H200015123 | PIK3R2       | 4,49606568 | 1,66799210 | 0,37098927 | 3,05344891  | 0 |
| 7143  | H200010391 | GCKR         | 4,49521397 | 1,81013403 | 0,40268028 | 3,63342116  | 0 |
| 8779  | H200013554 | PART1        | 4,49358504 | 1,92901761 | 0,42928254 | 4,04947004  | 0 |
| 11790 | H200021052 | HLA-DMB      | 4,49208926 | 1,98990780 | 0,44298047 | 4,18093577  | 0 |
| 5093  | H200006797 | CLCN7        | 4,49062476 | 1,41795264 | 0,31575843 | 2,72626658  | 0 |
| 9177  | H200014237 | UNC5B        | 4,48941006 | 2,03120982 | 0,45244471 | 3,93197632  | 0 |
| 3484  | H200004562 | LOC644538    | 4,48842521 | 2,17532689 | 0,48465259 | 4,74944775  | 0 |
| 5383  | H200007148 | CD34         | 4,48735654 | 2,25472057 | 0,50246076 | 5,14947859  | 0 |
| 7437  | H200010915 | LOC158301    | 4,48231652 | 2,05841250 | 0,45922962 | 4,25073134  | 0 |
| 836   | H200000986 | CPD          | 4,48172198 | 1,32513911 | 0,29567633 | 2,47177121  | 0 |
| 10745 | H200017933 | NEBL         | 4,47934403 | 2,98814551 | 0,66709444 | 24,86839132 | 0 |
| 8562  | H200013015 | MIER3        | 4,47558279 | 2,02404840 | 0,45224242 | 4,45182185  | 0 |
| 11286 | H200019436 | PDE4B        | 4,47518473 | 2,03736768 | 0,45525890 | 4,55857185  | 0 |
| 11048 | H200018937 | LOC92154     | 4,47478107 | 1,14419913 | 0,25569947 | 2,24459195  | 0 |
| 11795 | H200021060 | PABPC1       | 4,47440126 | 1,97917136 | 0,44233211 | 4,42498147  | 0 |
| 8712  | H200013380 | AOC2         | 4,47087771 | 2,68536901 | 0,60063575 | 9,90569402  | 0 |
| 9688  | H200015338 | RNF5         | 4,47068549 | 2,10689785 | 0,47126953 | 4,42713605  | 0 |
| 8956  | H200013878 | C11orf1      | 4,46138706 | 1,91395700 | 0,42900492 | 4,17183778  | 0 |
| 3425  | H200004480 | ATF6         | 4,46093241 | 1,94892509 | 0,43688738 | 3,90568901  | 0 |
| 430   | H200000494 | RLBP1        | 4,45367426 | 1,27489761 | 0,28625749 | 2,38291010  | 0 |
| 4663  | H200006275 | CAPN2        | 4,45347434 | 1,23018085 | 0,27622947 | 2,28802849  | 0 |
| 4628  | H200006235 | PSMF1        | 4,45289012 | 1,99104485 | 0,44713541 | 4,17764640  | 0 |
| 6642  | H200009395 | C17orf51     | 4,45220927 | 1,72029095 | 0,38639041 | 3,29278999  | 0 |
| 5027  | H200006711 | E2           | 4,45141665 | 1,69308973 | 0,38034852 | 3,12934005  | 0 |
| 5744  | H200007820 | CD99L2       | 4,45135773 | 1,80162902 | 0,40473697 | 3,56473344  | 0 |
| 6116  | H200008348 | SNAPC1       | 4,44945244 | 1,79289987 | 0,40294843 | 3,66499127  | 0 |
| 3733  | H200004925 | BMP2K        | 4,44935777 | 2,53045716 | 0,56872414 | 6,01310016  | 0 |
| 9779  | H200015518 | NKX2-8       | 4,44852375 | 2,47939061 | 0,55735133 | 8,38172860  | 0 |
| 3292  | H200004279 | ID4          | 4,44296512 | 2,04830927 | 0,46102304 | 4,17257391  | 0 |
| 8110  | H200012045 | CTAGE5       | 4,44040761 | 1,71132127 | 0,38539734 | 3,33586671  | 0 |
| 10138 | H200016443 | LOC391722    | 4,43720212 | 1,96783930 | 0,44348652 | 4,26492715  | 0 |
| 11801 | H200021080 | ZNF333       | 4,43526069 | 1,51963561 | 0,34262600 | 2,72305652  | 0 |
| 5287  | H200007030 | GRM7         | 4,43339906 | 2,11475844 | 0,47700611 | 4,58913215  | 0 |
| 9697  | H200015352 | C12orf59     | 4,43164184 | 1,94750999 | 0,43945564 | 4,14979858  | 0 |
| 7956  | H200011748 | PIAS2        | 4,42889234 | 1,12820805 | 0,25473820 | 2,16643093  | 0 |
| 7396  | H200010814 | C14orf148    | 4,42459962 | 2,02894577 | 0,45856031 | 4,29683970  | 0 |
| 7172  | H200010434 | FLJ36840     | 4,42327177 | 2,45466542 | 0,55494339 | 4,45282903  | 0 |
| 10703 | H200017802 | SEPT5        | 4,42315670 | 1,24599558 | 0,28169827 | 2,24890637  | 0 |
| 10851 | H200018215 | MERTK        | 4,42084958 | 1,36081491 | 0,30781751 | 2,63097839  | 0 |
| 4796  | H200006439 | GGCX         | 4,42052739 | 1,89135227 | 0,42785670 | 3,75968594  | 0 |
| 5688  | H200007734 | CYP2C9       | 4,41583214 | 1,88150388 | 0,42680139 | 3,91412740  | 0 |
| 4275  | H200005752 | GNB3         | 4,41326085 | 1,54074814 | 0,34911785 | 2,90560900  | 0 |
| 10325 | H200016898 | TAS2R7       | 4,41218810 | 2,07930551 | 0,47126402 | 4,20113944  | 0 |
| 11105 | H200019051 | ETFDH        | 4,41011272 | 1,91996181 | 0,43535436 | 4,15313452  | 0 |
| 6833  | H200009780 | SEMA4A       | 4,40936326 | 2,28747009 | 0,51877560 | 4,91671941  | 0 |
| 6703  | H200009504 | MMP25        | 4,40911687 | 1,88950171 | 0,42854426 | 4,01859357  | 0 |
| 11749 | H200020933 | ANAPC5       | 4,40903800 | 1,62491029 | 0,36854078 | 2,96488713  | 0 |
| 10880 | H200018317 | C9orf106     | 4,40399866 | 1,88546542 | 0,42812579 | 3,97160204  | 0 |
| 10820 | H200018157 | PPP1R3C      | 4,40317296 | 1,89799424 | 0,43105148 | 4,12260383  | 0 |

|       |            |                  |            |            |            |             |   |
|-------|------------|------------------|------------|------------|------------|-------------|---|
| 11868 | H200021275 | <u>QR5P3</u>     | 4,40196276 | 1,86746741 | 0,42423517 | 3,92385884  | 0 |
| 608   | H200000714 | <u>S100P</u>     | 4,40183355 | 1,37822680 | 0,31310289 | 2,74357028  | 0 |
| 10675 | H200017766 | <u>PCDHB4</u>    | 4,39963039 | 1,87126713 | 0,42532371 | 3,92972333  | 0 |
| 9887  | H200015691 | <u>SC4MOL</u>    | 4,39936618 | 1,86023959 | 0,42284264 | 3,85063386  | 0 |
| 6187  | H200008445 | <u>CYP4F12</u>   | 4,39728519 | 1,69005391 | 0,38434030 | 3,13102676  | 0 |
| 312   | H200000364 | <u>EGR2</u>      | 4,39516667 | 1,88574204 | 0,42904904 | 4,01494517  | 0 |
| 10518 | H200017404 | <u>IKZF2</u>     | 4,39417788 | 1,86916067 | 0,42537210 | 3,84799412  | 0 |
| 11261 | H200019385 | <u>ZNF493</u>    | 4,39203097 | 2,01424033 | 0,45861251 | 4,22437900  | 0 |
| 6837  | H200009799 | <u>MGC34824</u>  | 4,38358257 | 1,81784039 | 0,41469286 | 3,68203792  | 0 |
| 8091  | H200011999 | <u>OIP5</u>      | 4,38348116 | 1,40116570 | 0,31964679 | 2,70608066  | 0 |
| 5143  | H200006857 | <u>MGST2</u>     | 4,38153220 | 1,68850523 | 0,38536867 | 3,75417846  | 0 |
| 9590  | H200015113 | <u>IFNA2</u>     | 4,38066886 | 2,57091873 | 0,58687813 | 9,47879223  | 0 |
| 3335  | H200004344 | <u>CCNDBP1</u>   | 4,37955977 | 1,58903476 | 0,36282979 | 2,90014303  | 0 |
| 11757 | H200020957 | <u>WBSR17</u>    | 4,37903479 | 1,94173285 | 0,44341572 | 4,32994868  | 0 |
| 5777  | H200007866 | <u>SQCS5</u>     | 4,37630518 | 1,06691383 | 0,24379329 | 2,02939961  | 0 |
| 2848  | H200003657 | <u>KIF21A</u>    | 4,37596839 | 1,69686582 | 0,38776921 | 2,97498092  | 0 |
| 10104 | H200016342 | <u>ZNF442</u>    | 4,36355593 | 1,96988379 | 0,45144002 | 4,51437664  | 0 |
| 11839 | H200021198 | <u>DONSON</u>    | 4,36277959 | 1,60258656 | 0,36733154 | 3,20068019  | 0 |
| 6660  | H200009426 | <u>MYLK</u>      | 4,35822889 | 1,77790080 | 0,40794113 | 3,50916834  | 0 |
| 10978 | H200018708 | <u>MCM3APAS</u>  | 4,35578389 | 1,79742542 | 0,41265257 | 3,76810020  | 0 |
| 6360  | H200008710 | <u>ZDHHC21</u>   | 4,35541853 | 1,50194319 | 0,34484474 | 2,83602468  | 0 |
| 5373  | H200007137 | <u>IGF1</u>      | 4,35513167 | 1,85377962 | 0,42565409 | 3,76535241  | 0 |
| 6823  | H200009749 | <u>SETBP1</u>    | 4,34465659 | 1,29743715 | 0,29862824 | 2,41670028  | 0 |
| 7843  | H200011584 | <u>ZNF22</u>     | 4,34114679 | 1,94642227 | 0,44836592 | 4,51566200  | 0 |
| 10906 | H200018426 | <u>ASTN2</u>     | 4,34064336 | 1,95670562 | 0,45078700 | 4,17947263  | 0 |
| 9486  | H200014847 | <u>UBE1</u>      | 4,33994333 | 2,00717235 | 0,46248815 | 4,85382572  | 0 |
| 10620 | H200017582 | <u>KIAA1456</u>  | 4,33961530 | 3,11767089 | 0,71842103 | 16,56056017 | 0 |
| 9914  | H200015767 | <u>MIA3</u>      | 4,33841072 | 1,60313286 | 0,36952077 | 3,03341290  | 0 |
| 788   | H200000926 | <u>GATAD2B</u>   | 4,33777337 | 1,16617823 | 0,26884259 | 2,17090834  | 0 |
| 2546  | H200003236 | <u>ACAD11</u>    | 4,33659299 | 1,52902651 | 0,35258704 | 2,67734700  | 0 |
| 6838  | H200009800 | <u>LOC197135</u> | 4,33623418 | 1,93488966 | 0,44621429 | 4,02856128  | 0 |
| 1822  | H200002257 | <u>PRPSAP2</u>   | 4,33327135 | 1,33196471 | 0,30738087 | 2,34375243  | 0 |
| 7572  | H200011134 | <u>ARSF</u>      | 4,33184037 | 2,04033139 | 0,47100798 | 4,07627187  | 0 |
| 7053  | H200010248 | <u>TMEM28</u>    | 4,33012914 | 1,73526632 | 0,40074239 | 3,48022650  | 0 |
| 10509 | H200017353 | <u>PMS2L5</u>    | 4,32803834 | 1,75905635 | 0,40643271 | 3,46039055  | 0 |
| 7540  | H200011072 | <u>MLLT4</u>     | 4,32787193 | 1,60224913 | 0,37021639 | 2,98564714  | 0 |
| 10457 | H200017263 | <u>TNPO2</u>     | 4,32541742 | 1,84951465 | 0,42759218 | 3,81083262  | 0 |
| 10877 | H200018303 | <u>DOCK1</u>     | 4,32533459 | 1,83105167 | 0,42333180 | 3,78813169  | 0 |
| 11220 | H200019293 | <u>C12orf48</u>  | 4,31916304 | 1,95256425 | 0,45207005 | 5,33013244  | 0 |
| 11741 | H200020869 | <u>C1orf165</u>  | 4,31505810 | 1,92788887 | 0,44678167 | 3,90114629  | 0 |
| 8436  | H200012728 | <u>GEMIN4</u>    | 4,31227488 | 2,18171143 | 0,50593051 | 4,70601447  | 0 |
| 435   | H200000503 | <u>CCNF</u>      | 4,30909985 | 1,73844967 | 0,40343685 | 3,36391348  | 0 |
| 2241  | H200002822 | <u>ASB9</u>      | 4,30819941 | 1,26765861 | 0,29424325 | 2,31868489  | 0 |
| 7033  | H200010210 | <u>C1orf113</u>  | 4,30611685 | 1,08917793 | 0,25293738 | 2,12512820  | 0 |
| 7611  | H200011200 | <u>TKTL1</u>     | 4,30395934 | 2,10617950 | 0,48935860 | 4,66151409  | 0 |
| 4356  | H200005892 | <u>KIAA-DQB1</u> | 4,30377902 | 1,99424307 | 0,46337023 | 4,72771474  | 0 |
| 2407  | H200003052 | <u>TMEM55A</u>   | 4,30374985 | 1,29471406 | 0,30083395 | 2,34821984  | 0 |
| 7923  | H200011701 | <u>PFAAP5</u>    | 4,30013807 | 1,79864512 | 0,41827613 | 3,71344730  | 0 |
| 10698 | H200017796 | <u>GLT8D1</u>    | 4,29864748 | 1,20280164 | 0,27980932 | 2,24009965  | 0 |
| 2487  | H200003161 | <u>MYO6</u>      | 4,29649589 | 1,69549620 | 0,39458170 | 3,32987746  | 0 |
| 6809  | H200009698 | <u>KIAA1026</u>  | 4,29603593 | 2,09047476 | 0,48660551 | 4,53036108  | 0 |
| 9317  | H200014505 | <u>UGT1A6</u>    | 4,29599462 | 1,83601396 | 0,42737809 | 3,96927448  | 0 |
| 9312  | H200014486 | <u>ZNF34</u>     | 4,29596857 | 1,67374365 | 0,38960798 | 3,37500149  | 0 |
| 11305 | H200019484 | <u>DYNC1H1</u>   | 4,29456891 | 2,02041002 | 0,47045700 | 4,58530950  | 0 |
| 10024 | H200016194 | <u>CBX8</u>      | 4,29450964 | 1,59223138 | 0,37075976 | 3,25093041  | 0 |
| 9977  | H200015946 | <u>QR2W1</u>     | 4,29278114 | 2,02890737 | 0,47263238 | 4,49316575  | 0 |
| 3283  | H200004265 | <u>AS3MT</u>     | 4,29193382 | 2,00189239 | 0,46643133 | 3,70919167  | 0 |
| 7392  | H200010797 | <u>C6orf105</u>  | 4,29114382 | 1,30995005 | 0,30526827 | 2,52412664  | 0 |
| 655   | H200000773 | <u>FAM63A</u>    | 4,28597737 | 1,10540007 | 0,25791085 | 2,14197452  | 0 |
| 9763  | H200015491 | <u>DNER</u>      | 4,28353945 | 1,69986412 | 0,39683634 | 3,35645083  | 0 |
| 10026 | H200016201 | <u>WDR76</u>     | 4,28313866 | 1,26628284 | 0,29564367 | 2,38786001  | 0 |
| 4328  | H200005847 | <u>EYA4</u>      | 4,28001333 | 1,53723089 | 0,35916498 | 2,88287809  | 0 |
| 4342  | H200005866 | <u>GNAI3</u>     | 4,27911694 | 2,05617996 | 0,48051502 | 4,11634629  | 0 |
| 1267  | H200001517 | <u>ERBB4</u>     | 4,27655019 | 2,03348700 | 0,47549705 | 4,28883994  | 0 |
| 6827  | H200009762 | <u>HS2ST1</u>    | 4,27450502 | 1,83222988 | 0,42864142 | 3,73236839  | 0 |
| 11276 | H200019412 | <u>AKR7A2</u>    | 4,27434111 | 2,14941676 | 0,50286505 | 4,82922561  | 0 |
| 10065 | H200016258 | <u>RSF1</u>      | 4,26712354 | 1,85385558 | 0,43445088 | 3,88180416  | 0 |
| 11123 | H200019079 | <u>SMURF2</u>    | 4,26587546 | 2,51559810 | 0,58970266 | 10,45250858 | 0 |
| 9819  | H200015588 | <u>IGSF4</u>     | 4,26469311 | 2,31139344 | 0,54198353 | 6,74466428  | 0 |
| 8359  | H200012544 | <u>GHR</u>       | 4,26015591 | 2,01033200 | 0,47189165 | 4,25861447  | 0 |
| 10861 | H200018234 | <u>SLC30A5</u>   | 4,25770161 | 1,84364410 | 0,43301393 | 3,67960443  | 0 |
| 9941  | H200015837 | <u>ELOVL2</u>    | 4,25441165 | 1,99246575 | 0,46832933 | 4,23347185  | 0 |
| 4946  | H200006615 | <u>DHPS</u>      | 4,25431490 | 1,32944043 | 0,31249225 | 2,36625101  | 0 |
| 7040  | H200010225 | <u>FOXI1</u>     | 4,25293216 | 1,55653331 | 0,36599063 | 2,89875391  | 0 |
| 4065  | H200005420 | <u>OSBPL11</u>   | 4,25037124 | 1,45319554 | 0,34189850 | 2,75995648  | 0 |
| 9205  | H200014281 | <u>CAMK1</u>     | 4,24576373 | 2,44099724 | 0,57492536 | 5,86684296  | 0 |
| 11097 | H200019038 | <u>ATG9A</u>     | 4,24564343 | 1,83305974 | 0,43175075 | 3,15569794  | 0 |
| 8747  | H200013458 | <u>PGBD1</u>     | 4,23809223 | 1,70774529 | 0,40295142 | 3,48457018  | 0 |
| 1650  | H200002014 | <u>ANKRD44</u>   | 4,23190572 | 2,07071543 | 0,48931039 | 4,26730131  | 0 |
| 3174  | H200004093 | <u>ELMO1</u>     | 4,22701455 | 1,39765464 | 0,33064817 | 2,71116458  | 0 |
| 11550 | H200020157 | <u>SYNCRIP</u>   | 4,22632259 | 1,71624662 | 0,40608510 | 3,63735424  | 0 |
| 10832 | H200018183 | <u>CTNNB1</u>    | 4,22310819 | 1,81448167 | 0,42965550 | 3,63436473  | 0 |
| 2515  | H200003195 | <u>TMOD3</u>     | 4,20945350 | 1,77618559 | 0,42195159 | 3,48351635  | 0 |
| 11784 | H200021032 | <u>DENND1B</u>   | 4,20855753 | 1,84443763 | 0,43825886 | 3,87871399  | 0 |
| 3855  | H200005103 | <u>DGKE</u>      | 4,20637184 | 1,42904844 | 0,33973422 | 2,69677521  | 0 |
| 11177 | H200019159 | <u>SULT1A4</u>   | 4,20359098 | 1,14791709 | 0,27308011 | 2,22150526  | 0 |
| 4425  | H200005979 | <u>AP2B1</u>     | 4,20243913 | 1,69028817 | 0,40221598 | 3,21238403  | 0 |
| 10894 | H200018354 | <u>HMGCLL1</u>   | 4,20210447 | 1,81918866 | 0,43292324 | 3,78615240  | 0 |
| 6492  | H200009016 | <u>FNDC3B</u>    | 4,20169375 | 1,83339443 | 0,43634652 | 3,76001752  | 0 |
| 9855  | H200015644 | <u>GDA</u>       | 4,20008490 | 1,23270780 | 0,29349593 | 2,41611302  | 0 |
| 6602  | H200009320 | <u>OTX2</u>      | 4,19991567 | 1,74856404 | 0,41633313 | 3,28892785  | 0 |

|       |            |                           |            |            |            |            |   |
|-------|------------|---------------------------|------------|------------|------------|------------|---|
| 11738 | H200020864 | <a href="#">C6orf142</a>  | 4,19736410 | 2,00820714 | 0,47844483 | 4,67889030 | 0 |
| 10743 | H200017926 | <a href="#">SLC38A2</a>   | 4,19182730 | 1,21428049 | 0,28967808 | 2,36789982 | 0 |
| 8116  | H200012059 | <a href="#">CCBP2</a>     | 4,19101575 | 2,04546171 | 0,48805870 | 4,08854078 | 0 |
| 5815  | H200007920 | <a href="#">C14orf100</a> | 4,19009018 | 1,83701887 | 0,43841989 | 3,35309896 | 0 |
| 2467  | H200003135 | <a href="#">LOC56757</a>  | 4,18798533 | 1,74888182 | 0,41759502 | 3,48787961 | 0 |
| 9557  | H200015021 | <a href="#">GREM2</a>     | 4,18755476 | 1,91104780 | 0,45636366 | 3,90657310 | 0 |
| 2924  | H200003764 | <a href="#">KIAA0984</a>  | 4,18514620 | 1,93081128 | 0,46134859 | 4,08216069 | 0 |
| 8356  | H200012540 | <a href="#">HPS6</a>      | 4,18327812 | 1,31264490 | 0,31378380 | 2,37389920 | 0 |
| 9249  | H200014349 | <a href="#">DEGS1</a>     | 4,18123304 | 1,57871986 | 0,37757280 | 2,90395523 | 0 |
| 10391 | H200017103 | <a href="#">SLC43A3</a>   | 4,17962667 | 1,35715535 | 0,32470731 | 2,70031795 | 0 |
| 9922  | H200015781 | <a href="#">LY6G6C</a>    | 4,17681629 | 1,75009443 | 0,41900201 | 3,72109249 | 0 |
| 8576  | H200013046 | <a href="#">ZIC2</a>      | 4,16723221 | 1,77530508 | 0,42601540 | 3,13880345 | 0 |
| 8039  | H200011910 | <a href="#">FZD6</a>      | 4,16374793 | 1,28198515 | 0,30789211 | 2,32242957 | 0 |
| 11654 | H200020472 | <a href="#">PRKCB1</a>    | 4,15975707 | 1,10205101 | 0,26493158 | 2,14624443 | 0 |
| 5353  | H200007111 | <a href="#">TMEM56</a>    | 4,15975462 | 1,78755361 | 0,42972574 | 3,62996442 | 0 |
| 8454  | H200012779 | <a href="#">CHIA</a>      | 4,15877985 | 2,26577655 | 0,54481762 | 7,44189322 | 0 |
| 3251  | H200004213 | <a href="#">NOVA2</a>     | 4,15799871 | 2,11824875 | 0,50943937 | 5,18279437 | 0 |
| 11293 | H200019450 | <a href="#">MNT</a>       | 4,15690880 | 1,57624772 | 0,37918747 | 3,18990866 | 0 |
| 5844  | H200007970 | <a href="#">EFHC2</a>     | 4,15614402 | 1,71701061 | 0,41312587 | 3,42611223 | 0 |
| 11249 | H200019358 | <a href="#">RAB6A</a>     | 4,15225489 | 1,57476564 | 0,37925553 | 3,33969052 | 0 |
| 10991 | H200018770 | <a href="#">RASGEF1B</a>  | 4,14845798 | 1,96216627 | 0,47298690 | 3,94535309 | 0 |
| 1249  | H200001497 | <a href="#">PNMA2</a>     | 4,14449780 | 1,95257713 | 0,47112515 | 3,99458181 | 0 |
| 2174  | H200002736 | <a href="#">GLYAT</a>     | 4,14391432 | 1,76300990 | 0,42544555 | 3,54660698 | 0 |
| 2306  | H200002914 | <a href="#">IGFBP6</a>    | 4,13870429 | 1,37580771 | 0,33242474 | 2,47982015 | 0 |
| 9460  | H200014802 | <a href="#">PTRPR</a>     | 4,13723336 | 2,17682614 | 0,52615503 | 5,07287731 | 0 |
| 8989  | H200013921 | <a href="#">TRAM2</a>     | 4,13433820 | 1,11231427 | 0,26904288 | 2,18619462 | 0 |
| 10784 | H200018030 | <a href="#">CCRL2</a>     | 4,13337957 | 1,94895716 | 0,47151662 | 4,05011838 | 0 |
| 5718  | H200007774 | <a href="#">GALNT5</a>    | 4,13199482 | 1,55856808 | 0,37719507 | 2,97735072 | 0 |
| 8981  | H200013912 | <a href="#">SMAD6</a>     | 4,13167278 | 1,96108908 | 0,47464772 | 3,81983751 | 0 |
| 3142  | H200004054 | <a href="#">NHLH1</a>     | 4,13162258 | 1,84141572 | 0,44568827 | 4,22796182 | 0 |
| 8177  | H200012145 | <a href="#">KIAA0408</a>  | 4,13108326 | 1,96948304 | 0,47674736 | 4,72865125 | 0 |
| 5836  | H200007959 | <a href="#">VGF</a>       | 4,13035816 | 1,37119147 | 0,33197883 | 2,66725471 | 0 |
| 9673  | H200015292 | <a href="#">BRWD1</a>     | 4,13018787 | 1,72496108 | 0,41764712 | 3,47063357 | 0 |
| 17    | H200000016 | <a href="#">PIGA</a>      | 4,12943355 | 1,31210039 | 0,31774343 | 2,65832772 | 0 |
| 8996  | H200013931 | <a href="#">MLANA</a>     | 4,12775553 | 1,94408577 | 0,47097890 | 4,04791182 | 0 |
| 11099 | H200019042 | <a href="#">FAM54B</a>    | 4,12719269 | 1,67307420 | 0,40537826 | 3,03151360 | 0 |
| 9937  | H200015823 | <a href="#">TIMP3</a>     | 4,12683081 | 1,23658094 | 0,29964421 | 2,39528758 | 0 |
| 5468  | H200007289 | <a href="#">PTPRD</a>     | 4,12641150 | 1,85871003 | 0,45044224 | 3,62554827 | 0 |
| 2933  | H200003778 | <a href="#">C3orf29</a>   | 4,12589553 | 1,60572974 | 0,38918332 | 2,99009454 | 0 |
| 2287  | H200002890 | <a href="#">TFIP11</a>    | 4,11723199 | 1,89408973 | 0,46003959 | 3,82378171 | 0 |
| 9704  | H200015370 | <a href="#">CDIPT</a>     | 4,11720497 | 1,07314338 | 0,26064852 | 2,04231051 | 0 |
| 9134  | H200014154 | <a href="#">ZNF132</a>    | 4,11622211 | 2,08418725 | 0,50633498 | 4,32463061 | 0 |
| 9857  | H200015646 | <a href="#">KCTD3</a>     | 4,11262458 | 0,99902551 | 0,24291678 | 2,02465043 | 0 |
| 765   | H200000896 | <a href="#">VAV2</a>      | 4,11183892 | 1,31529842 | 0,31988082 | 2,62364504 | 0 |
| 9151  | H200014189 | <a href="#">STATH</a>     | 4,10976066 | 2,36013820 | 0,57427631 | 5,22796647 | 0 |
| 9479  | H200014833 | <a href="#">JUNB</a>      | 4,10512095 | 1,38085747 | 0,33637437 | 2,60802344 | 0 |
| 7153  | H200010404 | <a href="#">PDE4A</a>     | 4,10455054 | 2,52358675 | 0,61482658 | 6,11099077 | 0 |
| 9544  | H200014991 | <a href="#">MTMR1</a>     | 4,10437159 | 1,79940011 | 0,43841062 | 3,69728170 | 0 |
| 64    | H200000071 | <a href="#">POU4F2</a>    | 4,10379934 | 1,55146411 | 0,37805555 | 3,23748093 | 0 |
| 3814  | H200005040 | <a href="#">CD5L</a>      | 4,09849583 | 1,86515864 | 0,45508370 | 3,81179384 | 0 |
| 5252  | H200006990 | <a href="#">C1orf119</a>  | 4,09569626 | 1,73014959 | 0,42243113 | 3,32165547 | 0 |
| 10746 | H200017936 | <a href="#">MSRA</a>      | 4,08963045 | 1,77271516 | 0,43346586 | 3,70046317 | 0 |
| 4058  | H200005409 | <a href="#">CASQ1</a>     | 4,08828071 | 1,80618625 | 0,44179604 | 3,55571496 | 0 |
| 10899 | H200018377 | <a href="#">ZNF287</a>    | 4,08597640 | 1,77244937 | 0,43378845 | 3,65417022 | 0 |
| 6485  | H200008978 | <a href="#">MAGI1</a>     | 4,08347395 | 2,06890321 | 0,50665273 | 4,24863956 | 0 |
| 4732  | H200006362 | <a href="#">SPTAN1</a>    | 4,08024417 | 1,13568602 | 0,27833776 | 2,11906650 | 0 |
| 6789  | H200009664 | <a href="#">FSTL1</a>     | 4,07964020 | 1,04666646 | 0,25655852 | 2,04003469 | 0 |
| 11258 | H200019382 | <a href="#">PLA2G12B</a>  | 4,07952701 | 1,88621317 | 0,46236075 | 4,11702424 | 0 |
| 4105  | H200005485 | <a href="#">PAK1</a>      | 4,07376510 | 1,82901215 | 0,44897339 | 3,80455584 | 0 |
| 6917  | H200009983 | <a href="#">HERE</a>      | 4,06986262 | 2,00293998 | 0,49213946 | 4,46594476 | 0 |
| 4405  | H200005953 | <a href="#">ATXN1</a>     | 4,06373564 | 1,64977582 | 0,40597518 | 3,39415472 | 0 |
| 9831  | H200015602 | <a href="#">ZNF187</a>    | 4,06319938 | 1,10499548 | 0,27195207 | 2,18125706 | 0 |
| 4138  | H200005540 | <a href="#">RIMBP2</a>    | 4,06153544 | 1,94056503 | 0,47779099 | 3,75627871 | 0 |
| 9514  | H200014914 | <a href="#">AKR1D1</a>    | 4,06064934 | 2,01742133 | 0,49682234 | 4,27812043 | 0 |
| 5230  | H200006967 | <a href="#">CD47</a>      | 4,05682846 | 1,25351032 | 0,30898776 | 2,35247945 | 0 |
| 3313  | H200004314 | <a href="#">MBD4</a>      | 4,05494287 | 1,64643075 | 0,40603057 | 3,58413584 | 0 |
| 4151  | H200005554 | <a href="#">FBXO28</a>    | 4,05481936 | 1,62604268 | 0,40101483 | 3,14852605 | 0 |
| 1208  | H200001447 | <a href="#">LOC728558</a> | 4,05440756 | 1,31258945 | 0,32374384 | 2,40553795 | 0 |
| 3712  | H200004897 | <a href="#">AKAP5</a>     | 4,05379547 | 1,19691697 | 0,29525835 | 2,17243296 | 0 |
| 2863  | H200003673 | <a href="#">CNOT8</a>     | 4,05077507 | 1,83528100 | 0,45306910 | 3,74821813 | 0 |
| 11046 | H200018932 | <a href="#">PTCHD1</a>    | 4,05048512 | 2,08435682 | 0,51459436 | 6,29285174 | 0 |
| 11869 | H200021278 | <a href="#">SMC2</a>      | 4,04776276 | 1,15159430 | 0,28450143 | 2,15009591 | 0 |
| 10875 | H200018296 | <a href="#">C16orf68</a>  | 4,04657319 | 1,91675910 | 0,47367464 | 4,09756004 | 0 |
| 11425 | H200019834 | <a href="#">RAD50</a>     | 4,04602583 | 1,84868747 | 0,45691440 | 5,00927551 | 0 |
| 11728 | H200020828 | <a href="#">ACAD11</a>    | 4,04539684 | 1,95825210 | 0,48406922 | 4,02704248 | 0 |
| 4926  | H200006595 | <a href="#">HDHD1A</a>    | 4,04323417 | 1,03247744 | 0,25535930 | 2,06634726 | 0 |
| 9253  | H200014359 | <a href="#">ZNF687</a>    | 4,04276745 | 1,94114804 | 0,48015328 | 3,70258775 | 0 |
| 4203  | H200005634 | <a href="#">HOXA1</a>     | 4,04056274 | 1,73299232 | 0,42889875 | 3,48268717 | 0 |
| 5561  | H200007492 | <a href="#">SMARCB1</a>   | 4,03419636 | 1,53303314 | 0,38000955 | 2,72219327 | 0 |
| 8503  | H200012899 | <a href="#">ATP8A2</a>    | 4,03372680 | 2,36450296 | 0,58618322 | 8,41284716 | 0 |
| 118   | H200000136 | <a href="#">AFM</a>       | 4,03323650 | 1,14077877 | 0,28284450 | 2,21755448 | 0 |
| 3515  | H200004606 | <a href="#">APH1B</a>     | 4,03227658 | 1,62053726 | 0,40189139 | 3,22978461 | 0 |
| 9678  | H200015303 | <a href="#">CCR9</a>      | 4,03180501 | 1,94753303 | 0,48304247 | 4,19421818 | 0 |
| 8500  | H200012892 | <a href="#">CCNB3</a>     | 4,03076316 | 1,46261637 | 0,36286339 | 2,87152895 | 0 |
| 1423  | H200001728 | <a href="#">TMEM50B</a>   | 4,02867590 | 1,32956755 | 0,33002594 | 2,43700893 | 0 |
| 5826  | H200007939 | <a href="#">PSCK6</a>     | 4,02502389 | 2,39407139 | 0,59479681 | 4,58837915 | 0 |
| 1824  | H200002261 | <a href="#">LANCL1</a>    | 4,02281224 | 1,04077085 | 0,25871723 | 2,08131200 | 0 |
| 4046  | H200005386 | <a href="#">CODC77</a>    | 4,01804384 | 1,30831307 | 0,32560946 | 2,33232601 | 0 |
| 7832  | H200011569 | <a href="#">UBE2D2</a>    | 4,01527682 | 1,88498540 | 0,46945341 | 4,20361573 | 0 |
| 4610  | H200006215 | <a href="#">EID1</a>      | 4,01524229 | 1,16993129 | 0,29137253 | 2,31029407 | 0 |
| 3693  | H200004868 | <a href="#">NEK1</a>      | 4,00774428 | 1,14299665 | 0,28519700 | 2,16635074 | 0 |

|       |            |                    |            |            |            |            |   |
|-------|------------|--------------------|------------|------------|------------|------------|---|
| 5035  | H200006722 | <u>SEPT10</u>      | 4.00693632 | 1,88894110 | 0,47141780 | 3,51318432 | 0 |
| 767   | H200000898 | <u>LOC284244</u>   | 4.00526369 | 1,05810894 | 0,26417960 | 2,07308418 | 0 |
| 3990  | H200005299 | <u>AKAP9</u>       | 4.00519336 | 1,38134751 | 0,34488909 | 2,53177805 | 0 |
| 9663  | H200015259 | <u>JAG1</u>        | 4.00265957 | 1,75494944 | 0,43844584 | 3,53581975 | 0 |
| 11766 | H200020985 | <u>SPATA22</u>     | 4.00110502 | 1,71397299 | 0,42837491 | 3,50049260 | 0 |
| 11698 | H200020670 | <u>C1orf125</u>    | 4.00079768 | 2,34374497 | 0,58581942 | 8,87854773 | 0 |
| 3565  | H200004677 | <u>GPR126</u>      | 3.99963768 | 1,21344524 | 0,30338879 | 2,40387247 | 0 |
| 8848  | H200013706 | <u>POM121</u>      | 3.99897398 | 2,23800747 | 0,55964542 | 6,92718793 | 0 |
| 7974  | H200011771 | <u>MYO5C</u>       | 3.99435998 | 1,64937462 | 0,41292588 | 3,07948691 | 0 |
| 5829  | H200007945 | <u>DIRC1</u>       | 3.99135110 | 1,82939645 | 0,45834015 | 3,51404474 | 0 |
| 10147 | H200016458 | <u>WNT2B</u>       | 3.99116586 | 1,46783527 | 0,36777105 | 2,96098794 | 0 |
| 8164  | H200012130 | <u>HK1</u>         | 3.98965440 | 1,37660436 | 0,34504351 | 2,35797385 | 0 |
| 8066  | H200011954 | <u>C20orf179</u>   | 3.98912090 | 1,78292177 | 0,44694603 | 3,76888204 | 0 |
| 11849 | H200021214 | <u>KRTAP4-7</u>    | 3.98910128 | 1,38683639 | 0,34765635 | 2,61151322 | 0 |
| 10025 | H200016200 | <u>MYADML</u>      | 3.98902851 | 1,86457168 | 0,46742501 | 4,06204370 | 0 |
| 5144  | H200006858 | <u>GRB10</u>       | 3.98742669 | 1,36185527 | 0,34153738 | 2,41739180 | 0 |
| 2623  | H200003350 | <u>C1orf124</u>    | 3.98706035 | 1,66848727 | 0,41847555 | 3,31278590 | 0 |
| 10347 | H200016962 | <u>DUOX1</u>       | 3.98692587 | 1,35482728 | 0,33981753 | 2,28578909 | 0 |
| 6863  | H200009867 | <u>AP3M1</u>       | 3.98504240 | 1,74111896 | 0,43691353 | 3,06692502 | 0 |
| 10230 | H200016610 | <u>PPP1R2</u>      | 3.98495218 | 1,04316579 | 0,26177624 | 2,07024502 | 0 |
| 7424  | H200010877 | <u>PRSS35</u>      | 3.98169566 | 1,57904906 | 0,39657703 | 3,00423930 | 0 |
| 5593  | H200007568 | <u>NTNG2</u>       | 3.98122960 | 1,74478918 | 0,43825384 | 3,48536344 | 0 |
| 7395  | H200010812 | <u>PLCZ1</u>       | 3.98107711 | 1,87971603 | 0,47216268 | 3,74628342 | 0 |
| 7037  | H200010217 | <u>LOC283658</u>   | 3.98079385 | 1,75630149 | 0,44119378 | 3,61288649 | 0 |
| 3768  | H200004973 | <u>INTS2</u>       | 3.97809845 | 1,17272488 | 0,29479534 | 2,24734249 | 0 |
| 10898 | H200018371 | <u>SEPT11</u>      | 3.97229264 | 1,56513112 | 0,39401204 | 2,91966775 | 0 |
| 7000  | H200010153 | <u>LOC389541</u>   | 3.97122887 | 1,29802097 | 0,32685625 | 2,49521681 | 0 |
| 10956 | H200018589 | <u>THRAP2</u>      | 3.97018875 | 1,66780804 | 0,42008281 | 3,48560259 | 0 |
| 11179 | H200019161 | <u>AMMECR1</u>     | 3.97010460 | 1,04230471 | 0,26253835 | 2,10226788 | 0 |
| 11886 | H200021313 | <u>CAPN1</u>       | 3.96822435 | 1,59375088 | 0,40162822 | 3,32980709 | 0 |
| 10107 | H200016364 | <u>DSCR6</u>       | 3.96367584 | 1,86354673 | 0,47015619 | 3,52666934 | 0 |
| 8713  | H200013381 | <u>PNLIPRP2</u>    | 3.96165353 | 1,83090509 | 0,46215679 | 4,18894071 | 0 |
| 11004 | H200018831 | <u>FLJ30672</u>    | 3.96114675 | 1,58618069 | 0,40043472 | 3,17447989 | 0 |
| 8242  | H200012256 | <u>FLJ90709</u>    | 3.96074159 | 1,44180652 | 0,36402438 | 2,68522542 | 0 |
| 10299 | H200016772 | <u>MAPK6</u>       | 3.95940749 | 1,55811641 | 0,39352262 | 2,89305895 | 0 |
| 2786  | H200003570 | <u>SEMA4F</u>      | 3.95439277 | 1,37452311 | 0,34759398 | 2,62445819 | 0 |
| 3523  | H200004617 | <u>ZNF623</u>      | 3.95350808 | 1,72703707 | 0,43683661 | 3,50402581 | 0 |
| 9607  | H200015137 | <u>CUGBP2</u>      | 3.95066022 | 1,44360793 | 0,36540929 | 3,17711795 | 0 |
| 6517  | H200009104 | <u>EEF1G</u>       | 3.95061162 | 1,56338961 | 0,39573356 | 3,04316273 | 0 |
| 11197 | H200019205 | <u>PNLIPRP1</u>    | 3.94839320 | 1,83430384 | 0,46456970 | 3,57335353 | 0 |
| 4590  | H200006193 | <u>NR3C1</u>       | 3.94375715 | 1,65431429 | 0,41947671 | 3,26990129 | 0 |
| 6323  | H200008641 | <u>STRN3</u>       | 3.94275149 | 1,77901854 | 0,45121244 | 3,09741391 | 0 |
| 9778  | H200015515 | <u>LPO</u>         | 3.94079562 | 1,77335180 | 0,44999842 | 3,38006935 | 0 |
| 7759  | H200011466 | <u>LOC285550</u>   | 3.93551869 | 1,49339522 | 0,37946592 | 2,82107139 | 0 |
| 10841 | H200018202 | <u>CDK5RAP1</u>    | 3.93348940 | 1,05610892 | 0,26849161 | 2,10196095 | 0 |
| 7695  | H200011358 | <u>RNF166</u>      | 3.93143673 | 1,27817745 | 0,32511713 | 2,45971062 | 0 |
| 2378  | H200003011 | <u>SMARCAD1</u>    | 3.93095534 | 1,69643936 | 0,43155905 | 2,69773126 | 0 |
| 8292  | H200012381 | <u>C1orf114</u>    | 3.92850566 | 1,81228923 | 0,46131771 | 3,78964490 | 0 |
| 5560  | H200007491 | <u>OR5I1</u>       | 3.92539427 | 1,39251527 | 0,35474533 | 2,68510601 | 0 |
| 8628  | H200013172 | <u>KIAA0773</u>    | 3.92535595 | 1,69344336 | 0,43141141 | 3,38148882 | 0 |
| 10216 | H200016593 | <u>MUM1</u>        | 3.92441188 | 1,39751805 | 0,35610891 | 2,63279496 | 0 |
| 5553  | H200007475 | <u>LY6H</u>        | 3.92192428 | 1,88260259 | 0,48002013 | 3,88723571 | 0 |
| 11593 | H200020326 | <u>LOC642426</u>   | 3.92121320 | 1,58592408 | 0,40444730 | 3,24716810 | 0 |
| 8074  | H200011972 | <u>HTRA2</u>       | 3.91863443 | 1,54601356 | 0,39452865 | 3,14754453 | 0 |
| 2801  | H200003592 | <u>TNRC4</u>       | 3.91764664 | 1,79115238 | 0,45720111 | 3,62424619 | 0 |
| 529   | H200006820 | <u>LARS2</u>       | 3.91696430 | 1,82056044 | 0,46478862 | 5,06084363 | 0 |
| 5653  | H200007675 | <u>CUBN</u>        | 3.91260443 | 1,79148690 | 0,45787581 | 4,10603042 | 0 |
| 9994  | H200016068 | <u>GPR22</u>       | 3.90461210 | 1,73144009 | 0,44343460 | 3,59682731 | 0 |
| 7698  | H200011364 | <u>RAD54L2</u>     | 3.89941835 | 1,10578730 | 0,28357750 | 2,09426078 | 0 |
| 3851  | H200005096 | <u>AFF2</u>        | 3.89739761 | 1,82224740 | 0,46755491 | 3,84141768 | 0 |
| 11227 | H200019314 | <u>TMEM163</u>     | 3.89721318 | 1,58270194 | 0,40611120 | 3,43922948 | 0 |
| 9863  | H200015655 | <u>PIK3C3</u>      | 3.89716315 | 1,65829510 | 0,42551339 | 3,58141426 | 0 |
| 3052  | H200003935 | <u>RRBP6</u>       | 3.89349492 | 1,18565468 | 0,30452195 | 2,33776269 | 0 |
| 2572  | H200003272 | <u>APOLD1</u>      | 3.89233182 | 1,77978438 | 0,45725402 | 3,48831855 | 0 |
| 6505  | H200009057 | <u>KIAA1240</u>    | 3.88935967 | 1,89564609 | 0,48739285 | 4,39207192 | 0 |
| 9328  | H200014534 | <u>TTC9B</u>       | 3.88834550 | 1,83602286 | 0,47218614 | 4,05962252 | 0 |
| 10130 | H200016424 | <u>DBT</u>         | 3.88594227 | 1,51389985 | 0,38958372 | 2,92550038 | 0 |
| 11291 | H200019448 | <u>DDEF2</u>       | 3.88281372 | 1,83649636 | 0,47298080 | 3,66323275 | 0 |
| 6875  | H200009892 | <u>GTF2A1</u>      | 3.88262008 | 1,74512583 | 0,44947118 | 3,06516303 | 0 |
| 10522 | H200017426 | <u>TFCF</u>        | 3.87980931 | 1,91537725 | 0,49367819 | 3,82610583 | 0 |
| 5127  | H200006838 | <u>THOC2</u>       | 3.87850053 | 1,04822751 | 0,27026618 | 2,06235213 | 0 |
| 473   | H200005552 | <u>CSF3R</u>       | 3.87687134 | 1,79842486 | 0,46388562 | 3,61328408 | 0 |
| 8679  | H200013302 | <u>PDE5A</u>       | 3.87333366 | 1,84356005 | 0,47596211 | 3,67648205 | 0 |
| 6821  | H200009744 | <u>DDEF1</u>       | 3.87266100 | 1,85687126 | 0,47948200 | 3,61122096 | 0 |
| 10021 | H200016180 | <u>UIMC1</u>       | 3.87160421 | 1,75229222 | 0,45260107 | 3,47221740 | 0 |
| 7384  | H200010774 | <u>HSE5</u>        | 3.87125529 | 1,93736223 | 0,50044807 | 3,99977431 | 0 |
| 8433  | H200012723 | <u>RP11-393H1C</u> | 3.86996368 | 1,82094078 | 0,47053175 | 3,62296464 | 0 |
| 9683  | H200015319 | <u>NCOA3</u>       | 3.86952416 | 1,83910519 | 0,47527942 | 3,18683426 | 0 |
| 4347  | H200005880 | <u>CPN2</u>        | 3.86734217 | 1,82860469 | 0,47283240 | 3,69335889 | 0 |
| 5434  | H200007238 | <u>ZNF295</u>      | 3.86721916 | 1,17651202 | 0,30422688 | 2,22892678 | 0 |
| 4137  | H200005539 | <u>KIAA0427</u>    | 3.86420630 | 1,64207666 | 0,42494539 | 3,25690269 | 0 |
| 9189  | H200014257 | <u>C2orf3</u>      | 3.86277334 | 1,34674569 | 0,34864735 | 2,82351745 | 0 |
| 910   | H200001070 | <u>WDR26</u>       | 3.85421188 | 1,29882158 | 0,33698759 | 2,67146275 | 0 |
| 5507  | H200007368 | <u>CLSTN2</u>      | 3.85121144 | 1,20107516 | 0,31186944 | 2,28762190 | 0 |
| 1988  | H200002491 | <u>DUSP21</u>      | 3.85119838 | 1,89463919 | 0,49196094 | 3,74344270 | 0 |
| 9642  | H200015212 | <u>GRWD1</u>       | 3.85106131 | 1,42659191 | 0,37044124 | 2,77229051 | 0 |
| 10010 | H200016153 | <u>FA2H</u>        | 3.85068215 | 1,13096723 | 0,29370568 | 2,09159598 | 0 |
| 6938  | H200010025 | <u>ZMYND11</u>     | 3.85046617 | 1,28604129 | 0,33399626 | 2,48955330 | 0 |
| 8320  | H200012469 | <u>SLC6A11</u>     | 3.84979035 | 1,75252844 | 0,45522698 | 3,26918213 | 0 |
| 7564  | H200011125 | <u>MTA1</u>        | 3.84905010 | 1,35503925 | 0,35204511 | 2,51817141 | 0 |
| 8912  | H200013812 | <u>C4orf16</u>     | 3.84803543 | 1,42597191 | 0,37057141 | 2,58784194 | 0 |

|       |            |           |            |            |            |              |   |
|-------|------------|-----------|------------|------------|------------|--------------|---|
| 11792 | H200021056 | PSMD6     | 3,84450344 | 1,70359642 | 0,44312522 | 3,29181718   | 0 |
| 10367 | H200016989 | USP52     | 3,84266638 | 1,84356532 | 0,47976200 | 3,70767404   | 0 |
| 7713  | H200011384 | LINS1     | 3,84209643 | 1,10591377 | 0,28784123 | 2,15972340   | 0 |
| 10932 | H200018542 | RAB33A    | 3,83770997 | 1,88534583 | 0,49126845 | 3,88714184   | 0 |
| 2537  | H200003223 | POFUT2    | 3,83727473 | 0,99310745 | 0,25880541 | 2,01502842   | 0 |
| 11788 | H200021046 | C14orf32  | 3,83428311 | 1,38793153 | 0,36191941 | 2,88664448   | 0 |
| 7284  | H200010600 | ZNF608    | 3,83184007 | 1,53343101 | 0,40018137 | 3,08492481   | 0 |
| 11236 | H200019330 | KCTD20    | 3,82924415 | 1,12962231 | 0,29499877 | 2,30552688   | 0 |
| 7606  | H200011192 | WDR40A    | 3,82039284 | 1,25077362 | 0,32739398 | 2,29357263   | 0 |
| 11012 | H200018856 | TEX10     | 3,81942035 | 1,92838215 | 0,50488869 | 3,86669726   | 0 |
| 9805  | H200015565 | CHST6     | 3,81933359 | 1,30228053 | 0,34097062 | 2,45943825   | 0 |
| 7486  | H200010994 | C10orf22  | 3,81883450 | 1,03222937 | 0,27029958 | 2,13583372   | 0 |
| 967   | H200001139 | FEM1B     | 3,81754544 | 1,26168670 | 0,33049684 | 2,39971944   | 0 |
| 6608  | H200009336 | EDD1      | 3,81641974 | 1,96385595 | 0,51458070 | 4,21746250   | 0 |
| 10173 | H200016517 | SAMD4A    | 3,80994679 | 1,74479363 | 0,45795748 | 3,02599273   | 0 |
| 6641  | H200009394 | ELMOD2    | 3,80640111 | 1,75774270 | 0,46178599 | 3,48871421   | 0 |
| 3498  | H200004579 | SLC25A36  | 3,80437669 | 1,05876678 | 0,27830230 | 2,03793847   | 0 |
| 6220  | H200008487 | VPS41     | 3,80408520 | 1,70937681 | 0,44935292 | 3,47971224   | 0 |
| 10179 | H200016529 | HAL       | 3,80321851 | 1,74408232 | 0,45858062 | 3,56740980   | 0 |
| 7051  | H200010246 | ALDH3B2   | 3,79554994 | 1,86388063 | 0,49106998 | 4,77413582   | 0 |
| 1378  | H200001675 | STK38     | 3,79486651 | 1,06129817 | 0,27966680 | 2,08283402   | 0 |
| 2868  | H200003683 | FABP7     | 3,78795731 | 2,36384929 | 0,62404328 | 14,02185566  | 0 |
| 11760 | H200020973 | UCHL1     | 3,78465599 | 2,12669033 | 0,56192434 | 9,70264238   | 0 |
| 9096  | H200014083 | PSMD7     | 3,78179082 | 1,23255717 | 0,32591892 | 2,41309854   | 0 |
| 4330  | H200005850 | LY6G5B    | 3,78155214 | 1,51079539 | 0,39951727 | 2,78973399   | 0 |
| 10106 | H200016363 | LOC728434 | 3,77724871 | 1,66550175 | 0,44092986 | 3,43732301 a | 0 |
| 11388 | H200019700 | POLDIP3   | 3,77627009 | 1,00511324 | 0,26616561 | 2,08221171   | 0 |
| 11403 | H200019751 | CEP57     | 3,77529582 | 1,74627364 | 0,46255280 | 3,53886170   | 0 |
| 5350  | H200007108 | SNAP25    | 3,77218605 | 1,69083967 | 0,44823867 | 3,32054282   | 0 |
| 10650 | H200017635 | SLC24A2   | 3,77197712 | 1,79568539 | 0,47605946 | 3,73470771   | 0 |
| 2964  | H200003815 | UBR1      | 3,77164130 | 1,19506297 | 0,31685489 | 2,35239135   | 0 |
| 4528  | H200006098 | UBAP1     | 3,77108657 | 1,07900570 | 0,28612594 | 2,09239577   | 0 |
| 5219  | H200006951 | ST8SIA1   | 3,77027252 | 1,84125027 | 0,48835999 | 3,82039156   | 0 |
| 11798 | H200021068 | PSIP1     | 3,76916471 | 1,46647886 | 0,38907264 | 2,84481545   | 0 |
| 3739  | H200004932 | FAM119B   | 3,76427323 | 1,07295366 | 0,28503607 | 2,02835512   | 0 |
| 5640  | H200007650 | RUNX1     | 3,69049637 | 1,81595911 | 0,49206365 | 3,76025760   | 0 |
| 8251  | H200012272 | STK17B    | 3,62451868 | 1,36699912 | 0,37715328 | 2,71845569   | 0 |
| 5407  | H200007183 | GML       | 3,40985322 | 1,51999454 | 0,44576539 | 3,12859276   | 0 |
| 4974  | H200006648 | RGL1      | 3,18546393 | 1,21145838 | 0,38030830 | 2,29380907   | 0 |
| 10867 | H200018256 | ESR1      | 3,04017078 | 1,81610763 | 0,59737027 | 4,44686693   | 0 |

### Negative genes (614)

| Row   | Gene ID    | Gene Name  | Score(d)    | Numerator(r) | Denominator(s+s0) | Fold Change | q-value(%) |
|-------|------------|------------|-------------|--------------|-------------------|-------------|------------|
| 2597  | H200003310 | LRP6       | -8,61020309 | -1,89295597  | 0,219850327       | 0,270538996 | 0          |
| 4303  | H200005804 | CDKN2B     | -7,77238232 | -1,88879996  | 0,243014289       | 0,275993679 | 0          |
| 2935  | H200003780 | MYST4      | -7,61701068 | -1,48932801  | 0,195526575       | 0,353860938 | 0          |
| 9065  | H200014045 | ZNF174     | -7,59178518 | -1,90849001  | 0,251388832       | 0,263111011 | 0          |
| 5378  | H200007142 | MLF1       | -7,49187092 | -1,65360993  | 0,220720558       | 0,314397264 | 0          |
| 3033  | H200003912 | CPT1B      | -7,43720698 | -1,67731926  | 0,225530803       | 0,317361251 | 0          |
| 6259  | H200008544 | TARSL2     | -7,39519091 | -1,44539507  | 0,195450677       | 0,363829890 | 0          |
| 5084  | H200006783 | UCP2       | -7,29549556 | -2,03111189  | 0,278406295       | 0,254683570 | 0          |
| 3257  | H200004222 | KIAA1160   | -7,28080445 | -1,66659139  | 0,228902094       | 0,315446277 | 0          |
| 7386  | H200010779 | RAB27B     | -7,20301383 | -2,39840249  | 0,332972078       | 0,185398851 | 0          |
| 5193  | H200006915 | MYO1E      | -7,20072623 | -1,65783091  | 0,230231070       | 0,318103210 | 0          |
| 11211 | H200019263 | GPR61      | -7,15093242 | -1,97247557  | 0,275834738       | 0,260791400 | 0          |
| 8274  | H200012344 | ASCC1      | -7,11455669 | -1,80405047  | 0,253571733       | 0,287957748 | 0          |
| 6745  | H200009587 | ZNF436     | -7,04969471 | -1,23432922  | 0,175089741       | 0,425254266 | 0          |
| 6074  | H200008285 | ZSCAN5     | -7,00250300 | -1,61777434  | 0,231028010       | 0,330376621 | 0          |
| 9039  | H200014006 | CPT1B      | -7,00033213 | -1,89303456  | 0,270420678       | 0,276495762 | 0          |
| 8804  | H200013605 | DNAI2      | -6,99766167 | -1,53042650  | 0,218705416       | 0,350538935 | 0          |
| 7171  | H200010431 | NEO1       | -6,99644512 | -1,55141440  | 0,221743232       | 0,343978201 | 0          |
| 9610  | H200015141 | CHES1      | -6,97302094 | -1,51648884  | 0,217479462       | 0,351950439 | 0          |
| 10158 | H200016490 | TRQ        | -6,95997920 | -1,73431624  | 0,249184113       | 0,301483822 | 0          |
| 9318  | H200014508 | ZNF334     | -6,91453563 | -1,92786474  | 0,278813335       | 0,271760983 | 0          |
| 10423 | H200017204 | KATNB1     | -6,90298610 | -1,87130465  | 0,271086255       | 0,282681667 | 0          |
| 10450 | H200017254 | HEXDC      | -6,84552121 | -1,86320369  | 0,272178500       | 0,283370811 | 0          |
| 3330  | H200004339 | GKAP1      | -6,83243849 | -1,52114204  | 0,222635306       | 0,354236091 | 0          |
| 9917  | H200015773 | DNMT3A     | -6,80838201 | -1,46998268  | 0,215907785       | 0,361785135 | 0          |
| 7006  | H200010166 | HIST2H4A   | -6,78007951 | -1,96057475  | 0,289166926       | 0,251469188 | 0          |
| 7700  | H200011368 | GMSD       | -6,74577531 | -2,13213017  | 0,316068958       | 0,245466717 | 0          |
| 7269  | H200010581 | U1SNRNPBP  | -6,73648871 | -1,58995944  | 0,236021985       | 0,335416188 | 0          |
| 5175  | H200006892 | LAMB1      | -6,72731398 | -1,54612154  | 0,229827468       | 0,342736925 | 0          |
| 11552 | H200020190 | FAM62B     | -6,70278697 | -1,71101204  | 0,255268748       | 0,304207325 | 0          |
| 8403  | H200012647 | KONKS      | -6,65676080 | -1,43059478  | 0,214908545       | 0,369154801 | 0          |
| 8493  | H200012876 | HYAL1      | -6,65517966 | -1,93261330  | 0,290392355       | 0,271332928 | 0          |
| 7545  | H200011081 | RAD51L1    | -6,63868196 | -1,51813059  | 0,228679518       | 0,352390672 | 0          |
| 8050  | H200011928 | LTB4DH     | -6,59358913 | -2,11017813  | 0,320034824       | 0,223979493 | 0          |
| 6407  | H200008797 | DUS3L      | -6,57452781 | -1,86995337  | 0,284423981       | 0,283796434 | 0          |
| 5642  | H200007653 | CDK5       | -6,57245778 | -1,77465904  | 0,270014521       | 0,290777708 | 0          |
| 4560  | H200006145 | MARCKS     | -6,57228534 | -1,89482288  | 0,288305023       | 0,269107627 | 0          |
| 8706  | H200013366 | C5orf13    | -6,57004940 | -1,92495529  | 0,292989470       | 0,265514638 | 0          |
| 9608  | H200015139 | CLCN6      | -6,56702196 | -1,82369341  | 0,277704783       | 0,281660954 | 0          |
| 8092  | H200012007 | ARHGGEF10L | -6,54194289 | -1,83178355  | 0,280006045       | 0,290364857 | 0          |
| 6377  | H200008740 | ANKFY1     | -6,52950469 | -1,51019587  | 0,231287967       | 0,354428229 | 0          |
| 7654  | H200011282 | GABRB2     | -6,52765816 | -1,45441337  | 0,222807834       | 0,366993148 | 0          |
| 5165  | H200006881 | IL6ST      | -6,52042633 | -1,70530509  | 0,261532759       | 0,303908603 | 0          |
| 8727  | H200013412 | WDR4       | -6,51007196 | -1,37635949  | 0,211420011       | 0,388484591 | 0          |
| 2607  | H200003328 | HEYL       | -6,48231377 | -1,72210561  | 0,265662180       | 0,298680832 | 0          |
| 8987  | H200013919 | TNK2       | -6,47682945 | -1,20569307  | 0,186154827       | 0,432003855 | 0          |



|       |            |                            |             |             |             |             |   |
|-------|------------|----------------------------|-------------|-------------|-------------|-------------|---|
| 9226  | H200014309 | <a href="#">PCGF2</a>      | -6.46611377 | -1.84938810 | 0.286012304 | 0.289307948 | 0 |
| 1168  | H200001399 | <a href="#">CORO7</a>      | -6.43744277 | -1.56202188 | 0.242646333 | 0.338807571 | 0 |
| 5879  | H200008013 | <a href="#">TRIO</a>       | -6.39925493 | -1.61784580 | 0.252817838 | 0.334717780 | 0 |
| 8534  | H200012965 | <a href="#">SUSD2</a>      | -6.39363003 | -1.90323410 | 0.297676608 | 0.257609472 | 0 |
| 2862  | H200003671 | <a href="#">CAPS</a>       | -6.37694789 | -1.70589473 | 0.267509593 | 0.314701225 | 0 |
| 4367  | H200005906 | <a href="#">NCOA1</a>      | -6.37100064 | -1.60694653 | 0.252228279 | 0.330464903 | 0 |
| 3780  | H200004990 | <a href="#">LMD2</a>       | -6.37019736 | -1.44169698 | 0.226319045 | 0.370517316 | 0 |
| 6842  | H200009824 | <a href="#">ET</a>         | -6.36942573 | -1.99126035 | 0.312627925 | 0.266727710 | 0 |
| 9064  | H200014044 | <a href="#">TCEB3</a>      | -6.36621036 | -1.88563285 | 0.296193928 | 0.270347093 | 0 |
| 7085  | H200010301 | <a href="#">PNOG</a>       | -6.35735928 | -2.10911535 | 0.331759660 | 0.243132222 | 0 |
| 8800  | H200013588 | <a href="#">CUTL1</a>      | -6.34268819 | -1.53873952 | 0.242600531 | 0.335766557 | 0 |
| 9841  | H200015617 | <a href="#">C6orf96</a>    | -6.32999333 | -1.86874673 | 0.295220964 | 0.281371294 | 0 |
| 9393  | H200014672 | <a href="#">BAG4</a>       | -6.32910118 | -1.54877433 | 0.244706837 | 0.343286232 | 0 |
| 3709  | H200004892 | <a href="#">LILRA4</a>     | -6.30805201 | -1.70511954 | 0.270308414 | 0.318493413 | 0 |
| 7488  | H200010996 | <a href="#">PINX1</a>      | -6.30481483 | -1.82034508 | 0.288723004 | 0.292713693 | 0 |
| 8972  | H200013900 | <a href="#">GPR98</a>      | -6.30434785 | -2.18579849 | 0.346712863 | 0.208472171 | 0 |
| 2304  | H200002912 | <a href="#">MRE11A</a>     | -6.29902637 | -1.64400812 | 0.260994005 | 0.327057534 | 0 |
| 9119  | H200014120 | <a href="#">INPP5D</a>     | -6.29201213 | -1.76043416 | 0.279788742 | 0.301056348 | 0 |
| 4883  | H200006548 | <a href="#">ZNF32</a>      | -6.25403434 | -1.58231383 | 0.253006899 | 0.340050420 | 0 |
| 10188 | H200016546 | <a href="#">FKBP14</a>     | -6.25372202 | -1.99737587 | 0.319389935 | 0.254971866 | 0 |
| 6254  | H200008538 | <a href="#">C9orf46</a>    | -6.23714919 | -1.68999425 | 0.270956201 | 0.317155722 | 0 |
| 7436  | H200010914 | <a href="#">DDX25</a>      | -6.22437280 | -1.90722082 | 0.306411728 | 0.272478753 | 0 |
| 797   | H200000939 | <a href="#">SCN3B</a>      | -6.21449451 | -1.52281514 | 0.245042478 | 0.352878063 | 0 |
| 11149 | H200019112 | <a href="#">ZNF747</a>     | -6.21421026 | -1.79170249 | 0.288323442 | 0.283542946 | 0 |
| 9923  | H200015782 | <a href="#">LY6G6D</a>     | -6.20331814 | -1.54838588 | 0.249606072 | 0.349445540 | 0 |
| 7860  | H200011607 | <a href="#">QSSEP</a>      | -6.18067400 | -1.78662223 | 0.289065923 | 0.300501882 | 0 |
| 3609  | H200004740 | <a href="#">TAS2R49</a>    | -6.17930451 | -1.94302525 | 0.314440767 | 0.259234026 | 0 |
| 5119  | H200006826 | <a href="#">RAC1</a>       | -6.16145531 | -1.82249584 | 0.295789833 | 0.282453697 | 0 |
| 6272  | H200008568 | <a href="#">POU2F1</a>     | -6.14921332 | -1.62161595 | 0.263711123 | 0.334859131 | 0 |
| 7657  | H200011286 | <a href="#">MEIS2</a>      | -6.14742577 | -1.52644921 | 0.248307059 | 0.354833430 | 0 |
| 5805  | H200007905 | <a href="#">CHML</a>       | -6.14616772 | -1.45826443 | 0.237264014 | 0.368581728 | 0 |
| 5314  | H200007064 | <a href="#">IRF2</a>       | -6.13302094 | -1.71445721 | 0.279545306 | 0.316465712 | 0 |
| 10596 | H200017548 | <a href="#">ZNF232</a>     | -6.12782652 | -1.73710668 | 0.283478436 | 0.289471875 | 0 |
| 10574 | H200017518 | <a href="#">BCCIP</a>      | -6.12678352 | -2.00032871 | 0.326489210 | 0.267199476 | 0 |
| 11669 | H200020502 | <a href="#">C22orf25</a>   | -6.12408138 | -1.43952255 | 0.235059344 | 0.370149665 | 0 |
| 6553  | H200009214 | <a href="#">ZNF703</a>     | -6.12253065 | -1.50399996 | 0.245650049 | 0.347229118 | 0 |
| 4082  | H200005455 | <a href="#">SMARCE1</a>    | -6.11330715 | -1.19257471 | 0.195078488 | 0.433089132 | 0 |
| 8183  | H200012154 | <a href="#">ENOS3</a>      | -6.10617365 | -1.79348249 | 0.293716261 | 0.299464238 | 0 |
| 1450  | H200001762 | <a href="#">ELN</a>        | -6.10483331 | -1.43547972 | 0.235138233 | 0.377023388 | 0 |
| 6794  | H200009671 | <a href="#">SGK</a>        | -6.10061207 | -1.53251048 | 0.251206021 | 0.350955695 | 0 |
| 3838  | H200005073 | <a href="#">BARD1</a>      | -6.09976472 | -1.65946775 | 0.272054387 | 0.327088742 | 0 |
| 2233  | H200002812 | <a href="#">SIRT3</a>      | -6.09394577 | -1.85177758 | 0.303871687 | 0.291093623 | 0 |
| 11446 | H200019895 | <a href="#">RSNL2</a>      | -6.08563106 | -1.42265856 | 0.233773383 | 0.372010200 | 0 |
| 7043  | H200010228 | <a href="#">HRK</a>        | -6.07411837 | -1.53646746 | 0.252953164 | 0.346518887 | 0 |
| 3974  | H200005270 | <a href="#">GIT2</a>       | -6.07344126 | -1.73256672 | 0.285269363 | 0.312064732 | 0 |
| 9938  | H200015826 | <a href="#">CCDC131</a>    | -6.07037488 | -1.29467704 | 0.213277939 | 0.412317218 | 0 |
| 3766  | H200004970 | <a href="#">NDN</a>        | -6.06983463 | -1.49170523 | 0.245757144 | 0.353847188 | 0 |
| 9701  | H200015362 | <a href="#">C20orf121</a>  | -6.04951477 | -1.41058955 | 0.233173999 | 0.382171018 | 0 |
| 5800  | H200007898 | <a href="#">VCY</a>        | -6.04891463 | -1.89190095 | 0.312767012 | 0.284083110 | 0 |
| 6910  | H200009963 | <a href="#">ZNF629</a>     | -6.04803198 | -1.80433986 | 0.298335040 | 0.291254449 | 0 |
| 11337 | H200019569 | <a href="#">SNX21</a>      | -6.02052843 | -1.59981157 | 0.265726104 | 0.341381930 | 0 |
| 3946  | H200005228 | <a href="#">LSP1</a>       | -6.02006680 | -1.34562896 | 0.223523925 | 0.396332704 | 0 |
| 10283 | H200016731 | <a href="#">XQC7</a>       | -6.01031777 | -2.02151160 | 0.336340220 | 0.242286481 | 0 |
| 10264 | H200016684 | <a href="#">KRR1</a>       | -6.00943839 | -1.96098798 | 0.326318010 | 0.240113111 | 0 |
| 8514  | H200012916 | <a href="#">ABI3</a>       | -5.99754128 | -2.09523464 | 0.349348931 | 0.254864022 | 0 |
| 10728 | H200017894 | <a href="#">PHEF20L1</a>   | -5.99617851 | -1.61202232 | 0.268841616 | 0.334371277 | 0 |
| 3715  | H200004903 | <a href="#">ZADH2</a>      | -5.98839930 | -1.47695845 | 0.246636600 | 0.360702449 | 0 |
| 1309  | H200001580 | <a href="#">PBXIP1</a>     | -5.98736322 | -1.69374274 | 0.282886253 | 0.318831182 | 0 |
| 3423  | H200004477 | <a href="#">LRMP</a>       | -5.98602777 | -1.27719100 | 0.213362024 | 0.414859549 | 0 |
| 5904  | H200008042 | <a href="#">SUV420H2</a>   | -5.98397972 | -1.72479145 | 0.288234843 | 0.315442388 | 0 |
| 6418  | H200008839 | <a href="#">MLXIPL</a>     | -5.98014351 | -1.45697536 | 0.243635518 | 0.355139745 | 0 |
| 4314  | H200005825 | <a href="#">PRB3</a>       | -5.97548765 | -1.84902262 | 0.309434599 | 0.282014996 | 0 |
| 9114  | H200014110 | <a href="#">USP32</a>      | -5.96904557 | -1.59556138 | 0.267305946 | 0.340860429 | 0 |
| 8053  | H200011932 | <a href="#">AFF1</a>       | -5.96599585 | -1.76778228 | 0.296309674 | 0.293542730 | 0 |
| 8682  | H200013310 | <a href="#">TTC23</a>      | -5.96444218 | -1.70182569 | 0.285328559 | 0.321498579 | 0 |
| 5579  | H200007538 | <a href="#">UTS2</a>       | -5.96322596 | -1.61004878 | 0.269996273 | 0.318932987 | 0 |
| 8010  | H200011839 | <a href="#">KIAA0892</a>   | -5.95769588 | -1.41429146 | 0.237388999 | 0.381915515 | 0 |
| 8180  | H200012150 | <a href="#">ATF7IP</a>     | -5.94327119 | -1.48345066 | 0.249601712 | 0.364447112 | 0 |
| 11572 | H200020256 | <a href="#">DR1</a>        | -5.94222505 | -1.85898269 | 0.312842862 | 0.279922209 | 0 |
| 9754  | H200015463 | <a href="#">ZNF560</a>     | -5.93036072 | -1.44802076 | 0.244170773 | 0.363462032 | 0 |
| 401   | H200000463 | <a href="#">PLP1</a>       | -5.92440961 | -1.64354731 | 0.277419594 | 0.325317173 | 0 |
| 7487  | H200010995 | <a href="#">TLE4</a>       | -5.92425745 | -1.89097392 | 0.319191719 | 0.286602856 | 0 |
| 1512  | H200001844 | <a href="#">FAM117A</a>    | -5.91793157 | -1.36777039 | 0.231123049 | 0.393007006 | 0 |
| 8856  | H200013716 | <a href="#">C3orf21</a>    | -5.91153899 | -1.72790767 | 0.292294050 | 0.316026595 | 0 |
| 9216  | H200014297 | <a href="#">LMO2</a>       | -5.86707681 | -1.65889334 | 0.282746143 | 0.329069484 | 0 |
| 11159 | H200019127 | <a href="#">DYNC1L1L2</a>  | -5.86494497 | -1.47523206 | 0.251533829 | 0.342790666 | 0 |
| 8348  | H200012525 | <a href="#">DKFZp761E1</a> | -5.85301321 | -1.78028153 | 0.304164960 | 0.299138673 | 0 |
| 7253  | H200010557 | <a href="#">KIAA1414</a>   | -5.83812325 | -1.73169452 | 0.296618356 | 0.316674272 | 0 |
| 10555 | H200017484 | <a href="#">RAB4B</a>      | -5.83799819 | -1.54104340 | 0.263967777 | 0.336122466 | 0 |
| 3518  | H200004611 | <a href="#">HDGF2</a>      | -5.83662365 | -1.54943635 | 0.265467921 | 0.347551357 | 0 |
| 2454  | H200003117 | <a href="#">C9orf37</a>    | -5.83261139 | -1.34477266 | 0.230560991 | 0.398098834 | 0 |
| 11013 | H200018859 | <a href="#">MTHFS</a>      | -5.82357826 | -1.77617241 | 0.304996745 | 0.295224412 | 0 |
| 1489  | H200001811 | <a href="#">PSMB10</a>     | -5.81116014 | -1.32459248 | 0.227939422 | 0.405114557 | 0 |
| 2973  | H200003828 | <a href="#">WBP4</a>       | -5.80781051 | -1.28421239 | 0.221118162 | 0.410453829 | 0 |
| 11695 | H200020658 | <a href="#">AP4B1</a>      | -5.79571262 | -1.60945779 | 0.277697998 | 0.325115041 | 0 |
| 11883 | H200021308 | <a href="#">RAB28</a>      | -5.79394944 | -1.62223696 | 0.279988112 | 0.319114430 | 0 |
| 8489  | H200012872 | <a href="#">FIZ1</a>       | -5.79114892 | -1.34991154 | 0.233099090 | 0.396561470 | 0 |
| 2045  | H200002557 | <a href="#">RAB24</a>      | -5.78762173 | -1.58712710 | 0.274227857 | 0.341368048 | 0 |
| 8267  | H200012323 | <a href="#">ARHGDIG</a>    | -5.77736792 | -1.56635557 | 0.271119234 | 0.348702199 | 0 |
| 6766  | H200009629 | <a href="#">PBX3</a>       | -5.77694690 | -1.19853409 | 0.207468428 | 0.438282485 | 0 |
| 6702  | H200009502 | <a href="#">MAML2</a>      | -5.77673494 | -1.95470352 | 0.338375144 | 0.248341481 | 0 |

|       |            |                             |             |             |             |              |   |
|-------|------------|-----------------------------|-------------|-------------|-------------|--------------|---|
| 4054  | H200005402 | <a href="#">NAPG</a>        | -5.77467866 | -1.36580989 | 0.236517038 | 0.394934529  | 0 |
| 5703  | H200007755 | <a href="#">LI15</a>        | -5.77035281 | -1.52475250 | 0.264239043 | 0.346999347  | 0 |
| 6961  | H200010066 | <a href="#">KIAA1539</a>    | -5.75656265 | -1.80693654 | 0.313891578 | 0.303376897  | 0 |
| 7517  | H200011032 | <a href="#">ACVR1B</a>      | -5.74491261 | -1.31980407 | 0.229734403 | 0.403371493  | 0 |
| 3047  | H200003930 | <a href="#">C1orf96</a>     | -5.74386590 | -1.39361501 | 0.242626662 | 0.375046450  | 0 |
| 4501  | H200006065 | <a href="#">MTM1</a>        | -5.74074591 | -1.23560826 | 0.215234794 | 0.427649079  | 0 |
| 11525 | H200020108 | <a href="#">CCPG1</a>       | -5.73257345 | -1.77173670 | 0.309064806 | 0.308909979  | 0 |
| 9822  | H200015591 | <a href="#">POM3</a>        | -5.72445211 | -1.33876288 | 0.233867426 | 0.393516523  | 0 |
| 11803 | H200021082 | <a href="#">DKFZp547E01</a> | -5.72440428 | -1.18135901 | 0.206372393 | 0.443605587  | 0 |
| 3969  | H200005259 | <a href="#">C6orf10</a>     | -5.71394927 | -1.86602941 | 0.326574375 | 0.263319867  | 0 |
| 7732  | H200011421 | <a href="#">CDKN1C</a>      | -5.71221723 | -1.66051302 | 0.290695005 | 0.329783111  | 0 |
| 7915  | H200011691 | <a href="#">CCDC101</a>     | -5.70738213 | -1.75499001 | 0.307494744 | 0.296775263  | 0 |
| 2083  | H200002606 | <a href="#">MBIP</a>        | -5.70312336 | -1.57590026 | 0.276322316 | 0.341470162  | 0 |
| 3016  | H200003891 | <a href="#">PURA</a>        | -5.69335387 | -1.58999123 | 0.279271457 | 0.344786283  | 0 |
| 9428  | H200014754 | <a href="#">ZNF14</a>       | -5.69057829 | -1.64030387 | 0.288249065 | 0.316659457  | 0 |
| 6976  | H200010099 | <a href="#">ZGPAT</a>       | -5.68693879 | -1.24833025 | 0.219508296 | 0.416133115  | 0 |
| 1651  | H200002015 | <a href="#">CTSF</a>        | -5.68043746 | -1.44710653 | 0.254752655 | 0.361959579  | 0 |
| 7192  | H200010465 | <a href="#">TRAF6</a>       | -5.67889573 | -1.51521884 | 0.266815753 | 0.346483906  | 0 |
| 2323  | H200002937 | <a href="#">ZNF691</a>      | -5.67478930 | -1.43836503 | 0.253465803 | 0.373059893  | 0 |
| 8766  | H200013509 | <a href="#">ASPM</a>        | -5.66018678 | -1.35909714 | 0.240115246 | 0.383427170  | 0 |
| 170   | H200000201 | <a href="#">ITGA2B</a>      | -5.65588976 | -1.34032778 | 0.236979120 | 0.397542786  | 0 |
| 3506  | H200004593 | <a href="#">MAX</a>         | -5.65459620 | -1.39724449 | 0.247098888 | 0.386554747  | 0 |
| 7451  | H200010949 | <a href="#">SPATA17</a>     | -5.64721181 | -1.21433537 | 0.215032729 | 0.435382383  | 0 |
| 8035  | H200011896 | <a href="#">GABRD</a>       | -5.64574872 | -1.76251174 | 0.312183880 | 0.3133310897 | 0 |
| 5118  | H200006825 | <a href="#">RAPSIN</a>      | -5.63008533 | -1.56904078 | 0.278688632 | 0.335344931  | 0 |
| 4349  | H200005882 | <a href="#">FAH</a>         | -5.62196878 | -1.39921174 | 0.248882872 | 0.389125587  | 0 |
| 2087  | H200002613 | <a href="#">SMARCAL1</a>    | -5.61332000 | -1.35584531 | 0.241540711 | 0.398771947  | 0 |
| 10494 | H200017335 | <a href="#">GCC2</a>        | -5.60793634 | -1.40463833 | 0.250473302 | 0.375155015  | 0 |
| 3136  | H200004046 | <a href="#">SLC39A3</a>     | -5.60789331 | -1.31287666 | 0.234112274 | 0.404428740  | 0 |
| 5133  | H200006844 | <a href="#">DECRI</a>       | -5.60312245 | -1.57865781 | 0.281746084 | 0.339985132  | 0 |
| 6334  | H200008656 | <a href="#">ZNF268</a>      | -5.59943003 | -1.58790003 | 0.283582440 | 0.336231074  | 0 |
| 7590  | H200011171 | <a href="#">MXD4</a>        | -5.59484902 | -1.52341448 | 0.272288756 | 0.357973960  | 0 |
| 10117 | H200016398 | <a href="#">BIRC7</a>       | -5.58584435 | -1.49781517 | 0.268144810 | 0.356618259  | 0 |
| 3538  | H200004643 | <a href="#">PTP4A3</a>      | -5.58513175 | -1.41710845 | 0.253728741 | 0.381624723  | 0 |
| 4571  | H200006166 | <a href="#">MPV17</a>       | -5.58157002 | -1.69820561 | 0.304252317 | 0.309693255  | 0 |
| 7321  | H200010666 | <a href="#">KCTD17</a>      | -5.57224628 | -1.41823572 | 0.254517774 | 0.386662081  | 0 |
| 6427  | H200008853 | <a href="#">SLC35B3</a>     | -5.57109086 | -1.74326185 | 0.312912120 | 0.302925550  | 0 |
| 11517 | H200020094 | <a href="#">C4orf36</a>     | -5.55929123 | -1.54128138 | 0.277244224 | 0.343282268  | 0 |
| 11455 | H200019910 | <a href="#">CD2AP</a>       | -5.55786366 | -1.46633381 | 0.263829526 | 0.361744969  | 0 |
| 11633 | H200020438 | <a href="#">MOCS1</a>       | -5.55722577 | -1.31221834 | 0.236128311 | 0.404061096  | 0 |
| 8222  | H200012212 | <a href="#">STX8</a>        | -5.55689177 | -1.56507717 | 0.281646150 | 0.337042100  | 0 |
| 8261  | H200012288 | <a href="#">LOC440330</a>   | -5.55170314 | -1.32146578 | 0.238028898 | 0.409441529  | 0 |
| 2108  | H200002645 | <a href="#">ZNF79</a>       | -5.54158405 | -1.53096228 | 0.276267989 | 0.352312432  | 0 |
| 3953  | H200005240 | <a href="#">LBH</a>         | -5.54134460 | -1.50531852 | 0.271652212 | 0.363249181  | 0 |
| 4857  | H200006518 | <a href="#">NDST2</a>       | -5.53642885 | -1.26291037 | 0.228109202 | 0.425076957  | 0 |
| 9998  | H200016093 | <a href="#">NKX6-1</a>      | -5.53523345 | -1.67750835 | 0.303060091 | 0.326849211  | 0 |
| 11062 | H200018979 | <a href="#">TOMM40L</a>     | -5.52416054 | -1.27826623 | 0.231395562 | 0.415890697  | 0 |
| 11777 | H200021020 | <a href="#">APTX</a>        | -5.52403507 | -1.39521333 | 0.252571411 | 0.389211767  | 0 |
| 6241  | H200008515 | <a href="#">GABPB2</a>      | -5.51696124 | -1.74796299 | 0.316834379 | 0.285196495  | 0 |
| 11193 | H200019192 | <a href="#">OR2A4</a>       | -5.51573990 | -1.76477712 | 0.319952926 | 0.276473491  | 0 |
| 4701  | H200006323 | <a href="#">PPP1R1A</a>     | -5.51500265 | -1.23755260 | 0.224397463 | 0.429688407  | 0 |
| 4675  | H200006292 | <a href="#">SLC38A3</a>     | -5.51402490 | -1.33396774 | 0.241922691 | 0.403202329  | 0 |
| 3829  | H200005058 | <a href="#">CFP</a>         | -5.51159084 | -1.49350449 | 0.270975211 | 0.367691004  | 0 |
| 9913  | H200015765 | <a href="#">RASA2</a>       | -5.51062489 | -1.53604069 | 0.278741652 | 0.331658854  | 0 |
| 10551 | H200017480 | <a href="#">CHMP4A</a>      | -5.50701011 | -1.51620686 | 0.275323057 | 0.353350742  | 0 |
| 9433  | H200014759 | <a href="#">SMO</a>         | -5.49685478 | -1.76912896 | 0.321843860 | 0.300979090  | 0 |
| 11894 | H200021322 | <a href="#">PHF20</a>       | -5.49536181 | -1.60488312 | 0.292043213 | 0.320186267  | 0 |
| 2894  | H200003722 | <a href="#">PIGL</a>        | -5.49041064 | -1.30512983 | 0.237710786 | 0.408294573  | 0 |
| 8476  | H200012831 | <a href="#">TNFSF14</a>     | -5.47186183 | -2.05191098 | 0.374993200 | 0.259522551  | 0 |
| 1954  | H200002444 | <a href="#">TH1PA</a>       | -5.46878283 | -1.23531613 | 0.225885021 | 0.423844011  | 0 |
| 11256 | H200019375 | <a href="#">GOLGA7</a>      | -5.46252196 | -1.62575970 | 0.297620717 | 0.329197082  | 0 |
| 8732  | H200013423 | <a href="#">LRRC45</a>      | -5.45744538 | -1.54613675 | 0.283307783 | 0.345691293  | 0 |
| 4119  | H200005514 | <a href="#">HACL1</a>       | -5.45714671 | -1.30002945 | 0.238225123 | 0.410364475  | 0 |
| 2223  | H200002801 | <a href="#">RAB22A</a>      | -5.45341177 | -1.24480109 | 0.228260976 | 0.427444514  | 0 |
| 4650  | H200006260 | <a href="#">CEBPA</a>       | -5.45198340 | -1.32764542 | 0.243516043 | 0.406478018  | 0 |
| 11506 | H200020060 | <a href="#">LRRC23</a>      | -5.45078994 | -1.71068352 | 0.313841396 | 0.303423932  | 0 |
| 1929  | H200002413 | <a href="#">SLC30A1</a>     | -5.44656070 | -1.42523159 | 0.261675518 | 0.363557312  | 0 |
| 5867  | H200008000 | <a href="#">DHX8</a>        | -5.44529346 | -1.71185685 | 0.314373663 | 0.314930749  | 0 |
| 3743  | H200004939 | <a href="#">FBXL4</a>       | -5.44326327 | -1.25176587 | 0.229966071 | 0.415723889  | 0 |
| 6166  | H200008418 | <a href="#">MRPS16</a>      | -5.42464375 | -1.54416099 | 0.284656664 | 0.342440380  | 0 |
| 8255  | H200012277 | <a href="#">TAF1B</a>       | -5.42021648 | -1.57200647 | 0.290026510 | 0.345780396  | 0 |
| 7599  | H200011182 | <a href="#">CAPNS2</a>      | -5.42010548 | -1.38046858 | 0.254694043 | 0.384606552  | 0 |
| 1810  | H200002239 | <a href="#">B4GALT4</a>     | -5.41693764 | -1.58361210 | 0.292344533 | 0.348508441  | 0 |
| 3403  | H200004449 | <a href="#">SKIL</a>        | -5.41628721 | -1.57658316 | 0.291081897 | 0.330052410  | 0 |
| 6465  | H200008923 | <a href="#">CHST11</a>      | -5.41419485 | -1.72081369 | 0.317833720 | 0.302892533  | 0 |
| 6896  | H200009934 | <a href="#">S100A16</a>     | -5.41271527 | -1.54259707 | 0.284995051 | 0.356455157  | 0 |
| 11487 | H200019981 | <a href="#">NME6</a>        | -5.41167157 | -1.25948469 | 0.232734872 | 0.422014713  | 0 |
| 10070 | H200016268 | <a href="#">MAP2K5</a>      | -5.40460906 | -1.35968675 | 0.251579113 | 0.397340323  | 0 |
| 5513  | H200007383 | <a href="#">C10orf118</a>   | -5.40415911 | -1.50607382 | 0.278687912 | 0.343358882  | 0 |
| 10057 | H200016250 | <a href="#">HOOK1</a>       | -5.40132443 | -1.32148058 | 0.244658619 | 0.394875233  | 0 |
| 7721  | H200011402 | <a href="#">ELMO3</a>       | -5.38732161 | -1.12603583 | 0.209015891 | 0.455653785  | 0 |
| 10449 | H200017253 | <a href="#">PLXNB1</a>      | -5.38265053 | -1.63557248 | 0.303860054 | 0.338301666  | 0 |
| 7612  | H200011201 | <a href="#">SLC13A3</a>     | -5.38010877 | -1.73001916 | 0.321558398 | 0.279669742  | 0 |
| 4411  | H200005960 | <a href="#">APLP1</a>       | -5.37945286 | -1.61410989 | 0.300050941 | 0.343121329  | 0 |
| 1908  | H200002386 | <a href="#">LOC643837</a>   | -5.37285704 | -1.27127243 | 0.236610135 | 0.419970822  | 0 |
| 5282  | H200007024 | <a href="#">LOXL2</a>       | -5.36755491 | -1.44840168 | 0.269843850 | 0.377905197  | 0 |
| 2990  | H200003854 | <a href="#">ZCCHC3</a>      | -5.36713806 | -1.91127707 | 0.356107304 | 0.289616045  | 0 |
| 6643  | H200009397 | <a href="#">FLJ13137</a>    | -5.35823613 | -1.55118795 | 0.289496005 | 0.354847299  | 0 |
| 3551  | H200004659 | <a href="#">SIRT2</a>       | -5.35689850 | -1.08200799 | 0.201984037 | 0.475239237  | 0 |
| 1292  | H200001555 | <a href="#">MIZF</a>        | -5.34987943 | -1.33490301 | 0.249520205 | 0.395799053  | 0 |
| 4173  | H200005580 | <a href="#">SAMD9</a>       | -5.34415141 | -1.14519245 | 0.214288922 | 0.454647261  | 0 |

|       |            |                           |             |             |             |             |   |
|-------|------------|---------------------------|-------------|-------------|-------------|-------------|---|
| 8878  | H200013760 | <a href="#">KIAA1524</a>  | -5.34094094 | -1.89439851 | 0.354693777 | 0.299357026 | 0 |
| 3359  | H200004387 | <a href="#">COL9A2</a>    | -5.33496137 | -1.48844271 | 0.278997843 | 0.368194854 | 0 |
| 1923  | H200002404 | <a href="#">C16orf3</a>   | -5.32074831 | -1.49439823 | 0.280862417 | 0.371455505 | 0 |
| 2879  | H200003701 | <a href="#">EAF2</a>      | -5.31768425 | -1.51893561 | 0.285638549 | 0.346820256 | 0 |
| 6043  | H200008225 | <a href="#">CNNM4</a>     | -5.31397122 | -1.38398889 | 0.260443430 | 0.373837313 | 0 |
| 8964  | H200013889 | <a href="#">RPRR</a>      | -5.30747425 | -1.67119729 | 0.314876194 | 0.320131776 | 0 |
| 11167 | H200019144 | <a href="#">DICER1</a>    | -5.28922011 | -1.20332635 | 0.227505440 | 0.434138954 | 0 |
| 7016  | H200010185 | <a href="#">ANKRD15</a>   | -5.28809396 | -1.70802178 | 0.322993842 | 0.283549630 | 0 |
| 5595  | H200007577 | <a href="#">PLEKHG6</a>   | -5.28796178 | -1.44305955 | 0.272895231 | 0.381175061 | 0 |
| 3672  | H200004835 | <a href="#">RBJ</a>       | -5.28478929 | -1.24747279 | 0.236049673 | 0.427182335 | 0 |
| 1363  | H200001650 | <a href="#">MAGEE1</a>    | -5.27782332 | -1.31200780 | 0.248588806 | 0.398608046 | 0 |
| 3648  | H200004801 | <a href="#">KCNMB4</a>    | -5.27663420 | -1.23183852 | 0.233451566 | 0.432567756 | 0 |
| 7078  | H200010289 | <a href="#">CENPO</a>     | -5.27631610 | -1.15028629 | 0.218009358 | 0.443892470 | 0 |
| 2899  | H200003728 | <a href="#">ERC1</a>      | -5.26998235 | -1.28190358 | 0.243246275 | 0.403647509 | 0 |
| 8375  | H200012575 | <a href="#">LRCH4</a>     | -5.26565546 | -1.41563443 | 0.268842965 | 0.384544269 | 0 |
| 3535  | H200004636 | <a href="#">MAK10</a>     | -5.26460902 | -1.43467852 | 0.272513782 | 0.368660425 | 0 |
| 9118  | H200014118 | <a href="#">CREM</a>      | -5.26301196 | -1.40270562 | 0.266521458 | 0.371082805 | 0 |
| 6616  | H200009354 | <a href="#">C10orf57</a>  | -5.26234641 | -1.43394371 | 0.272491318 | 0.367191722 | 0 |
| 2260  | H200002851 | <a href="#">ARHGAP9</a>   | -5.25982297 | -1.37433075 | 0.261288405 | 0.399035840 | 0 |
| 6240  | H200008514 | <a href="#">DNAJB6</a>    | -5.25462343 | -1.43311578 | 0.272734250 | 0.368803801 | 0 |
| 8769  | H200013521 | <a href="#">DDX58</a>     | -5.25439060 | -1.33355370 | 0.253797976 | 0.389847402 | 0 |
| 1451  | H200001764 | <a href="#">PDCL</a>      | -5.24825386 | -1.57594888 | 0.300280611 | 0.353690456 | 0 |
| 5194  | H200006920 | <a href="#">MTR</a>       | -5.24198870 | -1.38348924 | 0.263924500 | 0.398434461 | 0 |
| 6228  | H200008498 | <a href="#">BRMS1L</a>    | -5.24191602 | -1.41622608 | 0.270173364 | 0.389736339 | 0 |
| 1294  | H200001560 | <a href="#">RPS10</a>     | -5.24181438 | -1.40930398 | 0.268858048 | 0.388253980 | 0 |
| 2676  | H200003424 | <a href="#">TAF4</a>      | -5.23630075 | -1.21228679 | 0.231515883 | 0.435265733 | 0 |
| 3566  | H200004679 | <a href="#">APITD1</a>    | -5.23048611 | -1.64522864 | 0.314546030 | 0.338725873 | 0 |
| 7627  | H200011226 | <a href="#">SPATA20</a>   | -5.22875218 | -1.30932784 | 0.250409237 | 0.414220216 | 0 |
| 8723  | H200013399 | <a href="#">C12orf43</a>  | -5.22448051 | -1.48759951 | 0.284736350 | 0.357607187 | 0 |
| 7744  | H200011436 | <a href="#">KHLH20</a>    | -5.21950922 | -1.46651697 | 0.280968365 | 0.372901710 | 0 |
| 10123 | H200016408 | <a href="#">PCSK1N</a>    | -5.21784209 | -1.55596016 | 0.298199933 | 0.357750917 | 0 |
| 11071 | H200018994 | <a href="#">C7orf23</a>   | -5.21603446 | -1.55324569 | 0.297782867 | 0.337839005 | 0 |
| 5532  | H200007429 | <a href="#">GOLGA2L1</a>  | -5.21318155 | -1.77028917 | 0.339579421 | 0.320328639 | 0 |
| 8610  | H200013127 | <a href="#">FAM20C</a>    | -5.20226207 | -1.55443321 | 0.298799482 | 0.357599693 | 0 |
| 5779  | H200007869 | <a href="#">TCF2</a>      | -5.19512023 | -1.71395567 | 0.329916459 | 0.277718689 | 0 |
| 6223  | H200008493 | <a href="#">ZNF346</a>    | -5.19409494 | -1.62047136 | 0.311983393 | 0.313469123 | 0 |
| 7620  | H200011212 | <a href="#">ZNF610</a>    | -5.19062264 | -1.25506476 | 0.241794645 | 0.413144210 | 0 |
| 4075  | H200005443 | <a href="#">GEFT</a>      | -5.18807560 | -1.57983612 | 0.304512934 | 0.354867456 | 0 |
| 2824  | H200003626 | <a href="#">CCDC22</a>    | -5.18713586 | -1.52959540 | 0.294882464 | 0.352816492 | 0 |
| 5735  | H200007805 | <a href="#">CRYBB2</a>    | -5.18638642 | -1.25944594 | 0.242836889 | 0.425801711 | 0 |
| 4382  | H200005923 | <a href="#">FABP6</a>     | -5.18032852 | -1.58898928 | 0.306735233 | 0.319951517 | 0 |
| 1644  | H200002007 | <a href="#">LEPR</a>      | -5.16837661 | -1.32150131 | 0.255689825 | 0.402783360 | 0 |
| 5847  | H200007975 | <a href="#">SCML2</a>     | -5.16406185 | -1.49483498 | 0.289468838 | 0.339052292 | 0 |
| 7520  | H200011039 | <a href="#">ERCC2</a>     | -5.16335727 | -1.83994847 | 0.356347310 | 0.307030000 | 0 |
| 4211  | H200005648 | <a href="#">ZNF673</a>    | -5.15374627 | -1.64828923 | 0.319823512 | 0.324566898 | 0 |
| 5188  | H200006909 | <a href="#">SEMA3B</a>    | -5.14832242 | -1.37346236 | 0.266778622 | 0.398727433 | 0 |
| 6928  | H200010006 | <a href="#">KHLH25</a>    | -5.14444707 | -1.59830137 | 0.310684773 | 0.334645987 | 0 |
| 7005  | H200010163 | <a href="#">ZNF169</a>    | -5.14301680 | -1.65235497 | 0.321281271 | 0.339146577 | 0 |
| 8253  | H200012275 | <a href="#">ZNHIT2</a>    | -5.13580734 | -1.42278088 | 0.277031592 | 0.382844219 | 0 |
| 4737  | H200006369 | <a href="#">FHIT</a>      | -5.13138588 | -1.73118573 | 0.337371964 | 0.278768600 | 0 |
| 6904  | H200009956 | <a href="#">KIF18A</a>    | -5.12725075 | -1.29274901 | 0.252132980 | 0.414664851 | 0 |
| 2203  | H200002775 | <a href="#">TLK1</a>      | -5.11690002 | -1.39799360 | 0.273211044 | 0.389343353 | 0 |
| 3657  | H200004814 | <a href="#">TCFL5</a>     | -5.10882754 | -1.56447108 | 0.306228986 | 0.333179459 | 0 |
| 8467  | H200012809 | <a href="#">ANKRD26</a>   | -5.10525510 | -1.44595089 | 0.283227940 | 0.366125156 | 0 |
| 10467 | H200017284 | <a href="#">PPM1F</a>     | -5.09779327 | -1.45928671 | 0.286258512 | 0.356751403 | 0 |
| 1873  | H200002339 | <a href="#">KCTD6</a>     | -5.09648822 | -1.31106827 | 0.257249348 | 0.412161508 | 0 |
| 8724  | H200013406 | <a href="#">PURB</a>      | -5.09544838 | -1.72062788 | 0.337679385 | 0.290448310 | 0 |
| 4077  | H200005447 | <a href="#">STEAP1</a>    | -5.07975504 | -1.43348041 | 0.282194790 | 0.376837460 | 0 |
| 3106  | H200004008 | <a href="#">RNF24</a>     | -5.07739281 | -1.25681341 | 0.247531255 | 0.420431699 | 0 |
| 8345  | H200012521 | <a href="#">TCL1B</a>     | -5.07236734 | -1.46698196 | 0.289210514 | 0.375665631 | 0 |
| 10191 | H200016553 | <a href="#">L3MBTL2</a>   | -5.07018190 | -1.27965196 | 0.252387781 | 0.416681641 | 0 |
| 1963  | H200002458 | <a href="#">PEMT</a>      | -5.06941868 | -1.37665338 | 0.271560403 | 0.391547663 | 0 |
| 7781  | H200011497 | <a href="#">ING2</a>      | -5.06728422 | -1.40201694 | 0.276680147 | 0.379202213 | 0 |
| 9236  | H200014323 | <a href="#">SHF</a>       | -5.06609988 | -1.36558931 | 0.269554360 | 0.385952083 | 0 |
| 10897 | H200018367 | <a href="#">POLC3</a>     | -5.06260628 | -1.27064652 | 0.250986637 | 0.422181387 | 0 |
| 8184  | H200012156 | <a href="#">C8orf70</a>   | -5.06005660 | -1.30783766 | 0.258463049 | 0.413650853 | 0 |
| 10032 | H200016211 | <a href="#">ZNF219</a>    | -5.05727617 | -1.42861713 | 0.282487466 | 0.375049850 | 0 |
| 11699 | H200020672 | <a href="#">ZNF429</a>    | -5.05573472 | -1.49422191 | 0.295549904 | 0.354368898 | 0 |
| 2369  | H200002998 | <a href="#">COL4A3BP</a>  | -5.04510564 | -1.13812869 | 0.225590657 | 0.454153821 | 0 |
| 11005 | H200018833 | <a href="#">LOC727918</a> | -5.03963041 | -1.29332600 | 0.256631120 | 0.391541085 | 0 |
| 2667  | H200003412 | <a href="#">RAB11FIP5</a> | -5.03962474 | -1.40801121 | 0.279388106 | 0.390335694 | 0 |
| 4625  | H200006230 | <a href="#">ANK3</a>      | -5.03805791 | -1.96000743 | 0.389040273 | 0.285580749 | 0 |
| 4123  | H200005521 | <a href="#">PTPN6</a>     | -5.03587997 | -1.36395359 | 0.270847120 | 0.384769602 | 0 |
| 9867  | H200015660 | <a href="#">RSC1A1</a>    | -5.03572410 | -1.42842989 | 0.283659284 | 0.370776874 | 0 |
| 1654  | H200002018 | <a href="#">CCDC113</a>   | -5.03415247 | -1.23206233 | 0.244740766 | 0.421587571 | 0 |
| 9173  | H200014231 | <a href="#">CHMP4C</a>    | -5.03112440 | -1.65955745 | 0.329858163 | 0.341505975 | 0 |
| 5340  | H200007094 | <a href="#">NPTX1</a>     | -5.02648965 | -1.42956325 | 0.284405888 | 0.386051453 | 0 |
| 6805  | H200009687 | <a href="#">C18orf43</a>  | -5.02486709 | -1.32398436 | 0.263486444 | 0.399398289 | 0 |
| 9009  | H200013953 | <a href="#">BACH1</a>     | -5.02435166 | -1.31574722 | 0.261874031 | 0.413472747 | 0 |
| 4607  | H200006212 | <a href="#">PMM1</a>      | -5.01952104 | -1.31165087 | 0.261309965 | 0.411998508 | 0 |
| 7515  | H200011029 | <a href="#">RTN1</a>      | -5.01511936 | -1.33110651 | 0.265418711 | 0.409233227 | 0 |
| 5240  | H200006978 | <a href="#">PTPN2</a>     | -5.01508760 | -1.34564620 | 0.268319580 | 0.387881433 | 0 |
| 4036  | H200005370 | <a href="#">CDC2L5</a>    | -5.00619134 | -1.39405017 | 0.278465219 | 0.393157616 | 0 |
| 1712  | H200002093 | <a href="#">MID2</a>      | -5.00450855 | -1.45080618 | 0.289899830 | 0.383606394 | 0 |
| 11314 | H200019502 | <a href="#">DNAJC4</a>    | -5.00310638 | -1.34354165 | 0.268541492 | 0.381450293 | 0 |
| 5645  | H200007660 | <a href="#">IRE7</a>      | -5.00290531 | -1.28393882 | 0.256638641 | 0.418948412 | 0 |
| 6046  | H200008241 | <a href="#">PAWR</a>      | -4.98931884 | -1.18673573 | 0.237855261 | 0.443227066 | 0 |
| 5656  | H200007678 | <a href="#">HEXA</a>      | -4.98771872 | -1.36138062 | 0.272946551 | 0.387442144 | 0 |
| 5817  | H200007923 | <a href="#">SCN1B</a>     | -4.98559918 | -1.51513289 | 0.303901866 | 0.370422407 | 0 |
| 9265  | H200014379 | <a href="#">MORN1</a>     | -4.98499723 | -1.18861196 | 0.238437838 | 0.434888429 | 0 |
| 1809  | H200002237 | <a href="#">FLJ21963</a>  | -4.97805216 | -1.62670110 | 0.326774621 | 0.341102628 | 0 |

|         |            |           |             |             |             |             |   |
|---------|------------|-----------|-------------|-------------|-------------|-------------|---|
| 6765    | H200009627 | MND1      | -4.97722025 | -1.80083045 | 0.361814498 | 0.306816678 | 0 |
| 7308    | H200010644 | ZNF580    | -4.97268344 | -1.67475540 | 0.336791075 | 0.285058067 | 0 |
| 7640    | H200011251 | LOC157503 | -4.97152440 | -1.71030377 | 0.344019990 | 0.332195142 | 0 |
| 10374   | H200017004 | DSCR1L2   | -4.97042504 | -1.42223726 | 0.286139968 | 0.382018692 | 0 |
| 576     | H200006679 | SCNN1A    | -4.97006473 | -1.20971204 | 0.243399654 | 0.419969996 | 0 |
| 5522    | H200007408 | ZXDA      | -4.96685467 | -1.34901537 | 0.271603553 | 0.402337921 | 0 |
| 11018   | H200018866 | HNRPAB    | -4.96425205 | -1.40434565 | 0.282891690 | 0.373815843 | 0 |
| 10645   | H200017628 | GBA       | -4.96145922 | -1.29303859 | 0.260616592 | 0.394739493 | 0 |
| 8698    | H200013350 | GNL3L     | -4.95824509 | -1.47713824 | 0.297915536 | 0.360375282 | 0 |
| 3019    | H200003894 | HSPBAP1   | -4.95064763 | -1.30044209 | 0.262681207 | 0.399877565 | 0 |
| 5075    | H200006771 | MAPK8IP2  | -4.94253785 | -1.41441876 | 0.286172570 | 0.368162211 | 0 |
| 2744    | H200003520 | TOLLIP    | -4.94214561 | -1.43332260 | 0.290020310 | 0.386638441 | 0 |
| 2187    | H200002754 | N4BP2     | -4.93911249 | -1.02090678 | 0.206698426 | 0.494525961 | 0 |
| 6396    | H200008786 | MRFAP1L1  | -4.93423991 | -1.50351626 | 0.304710814 | 0.365466092 | 0 |
| 5798    | H200007894 | PDGFRL    | -4.93200007 | -1.56835234 | 0.317995198 | 0.338785460 | 0 |
| 9033    | H200013994 | PDPK1     | -4.92503916 | -1.16266085 | 0.236071392 | 0.452916952 | 0 |
| 5196    | H200006922 | PHF16     | -4.92154475 | -1.37981495 | 0.280362166 | 0.382281372 | 0 |
| 11665   | H200020498 | THAP8     | -4.91961223 | -1.30442278 | 0.265147479 | 0.421387318 | 0 |
| 7276    | H200010592 | LZTS1     | -4.90950961 | -1.35537592 | 0.276071548 | 0.404628697 | 0 |
| 10550   | H200017479 | MSRB2     | -4.90868288 | -1.40189269 | 0.285594471 | 0.377048845 | 0 |
| 4207    | H200005643 | SPHK1     | -4.90738951 | -1.42849940 | 0.291091505 | 0.365263864 | 0 |
| 9900    | H200015717 | ATPIF1    | -4.90579973 | -1.67187690 | 0.340795995 | 0.326098913 | 0 |
| 5533    | H200007432 | C3orf9    | -4.89482429 | -1.10658742 | 0.226072961 | 0.467603679 | 0 |
| 5819    | H200007926 | TP53BP1   | -4.89396117 | -1.18075193 | 0.241267122 | 0.441514296 | 0 |
| 8592    | H200013091 | ZNF358    | -4.89280177 | -1.10044863 | 0.224911754 | 0.464168634 | 0 |
| 5894    | H200008032 | MGAT2     | -4.88787612 | -1.41045964 | 0.288562887 | 0.388910461 | 0 |
| 6045    | H200008236 | PRIC285   | -4.87749595 | -1.01663159 | 0.208433099 | 0.492781765 | 0 |
| 9171    | H200014229 | TRIM24    | -4.87367804 | -1.68856114 | 0.346465467 | 0.280290121 | 0 |
| 8531    | H200012958 | RNF121    | -4.87092073 | -1.47617662 | 0.303059053 | 0.362602901 | 0 |
| 11878   | H200021300 | SORT1     | -4.86630009 | -1.13246520 | 0.232715858 | 0.463666811 | 0 |
| 8570    | H200013034 | C1orf182  | -4.86125707 | -1.32899686 | 0.273385431 | 0.391810073 | 0 |
| 2246    | H200002830 | MECR      | -4.85743958 | -1.11786494 | 0.230134605 | 0.465828563 | 0 |
| 3813    | H200005038 | SFRS2IP   | -4.84953250 | -1.13467746 | 0.233976670 | 0.459077882 | 0 |
| 7964    | H200011759 | ROBO4     | -4.84704713 | -1.08445240 | 0.223734652 | 0.476494790 | 0 |
| 5748    | H200007827 | ZNF398    | -4.84646817 | -1.39265845 | 0.287355327 | 0.398673210 | 0 |
| 11352   | H200019620 | HVCN1     | -4.84559432 | -1.21886952 | 0.251541801 | 0.424664221 | 0 |
| 2783    | H200003567 | RASD1     | -4.83880783 | -1.30634617 | 0.269972731 | 0.419908071 | 0 |
| 3707    | H200004887 | ZNF228    | -4.83840548 | -1.19586510 | 0.247160991 | 0.442334023 | 0 |
| 2477    | H200003146 | STK11IP   | -4.83790361 | -1.32038603 | 0.272925246 | 0.403074454 | 0 |
| 10345   | H200016958 | FAM120C   | -4.83735189 | -1.79935095 | 0.371970240 | 0.319981340 | 0 |
| 795     | H200000937 | CQNL1     | -4.83477904 | -1.27428130 | 0.263565572 | 0.420894106 | 0 |
| 527     | H200000618 | CD302     | -4.82664906 | -1.15563030 | 0.239427041 | 0.458758499 | 0 |
| 6627    | H200009372 | GNL3L     | -4.82652048 | -1.25276458 | 0.259558534 | 0.414190386 | 0 |
| 7111    | H200010342 | BPI       | -4.82613338 | -1.65938404 | 0.343833024 | 0.291495312 | 0 |
| 11499   | H200020042 | C1orf72   | -4.82073699 | -1.43925178 | 0.298554305 | 0.384350960 | 0 |
| 7041    | H200010226 | ARHGAP22  | -4.80758161 | -1.19783111 | 0.249154607 | 0.424522151 | 0 |
| 10359   | H200016975 | C1orf112  | -4.80334240 | -1.19000180 | 0.247744529 | 0.426274666 | 0 |
| 215     | H200000255 | SLC10A1   | -4.79809814 | -1.52233620 | 0.317279088 | 0.371663841 | 0 |
| 126     | H200000147 | FUCA1     | -4.79445814 | -1.31954147 | 0.275222232 | 0.409405993 | 0 |
| 6253    | H200008536 | UFD1L     | -4.79099341 | -1.02982811 | 0.214950850 | 0.488482002 | 0 |
| 3012    | H200003885 | GLRX      | -4.79039395 | -1.38637450 | 0.289407200 | 0.393594172 | 0 |
| 11846   | H200021207 | PDCD6     | -4.78878875 | -1.17337219 | 0.245024838 | 0.455506238 | 0 |
| 4972    | H200006646 | CD83      | -4.78840835 | -1.42036922 | 0.296626587 | 0.375626528 | 0 |
| 1765    | H200002180 | ACOX3     | -4.78463018 | -1.51130707 | 0.315867060 | 0.366228753 | 0 |
| 2559    | H200003253 | MPP2      | -4.78392116 | -1.07081014 | 0.223835240 | 0.477820743 | 0 |
| 4152    | H200005557 | RNF113A   | -4.78353350 | -1.37430268 | 0.287298642 | 0.376283690 | 0 |
| 3770    | H200004975 | RABL4     | -4.78157350 | -1.30313274 | 0.272532198 | 0.395137414 | 0 |
| 10749   | H200017941 | LSG1      | -4.77234878 | -1.28284727 | 0.268808366 | 0.415524933 | 0 |
| 4265    | H200005730 | LYAR      | -4.77048013 | -1.75407966 | 0.367694574 | 0.315173924 | 0 |
| 7432    | H200010904 | DOK6      | -4.76196381 | -1.07357908 | 0.225448812 | 0.477168956 | 0 |
| 9986    | H200016008 | VPREB1    | -4.76129478 | -1.53149184 | 0.321654490 | 0.352342067 | 0 |
| 53      | H200000059 | LTK       | -4.76040865 | -1.42384282 | 0.299100965 | 0.364112004 | 0 |
| 10465   | H200017280 | TRFP      | -4.75614471 | -1.23378850 | 0.259409369 | 0.436236505 | 0 |
| 8915    | H200013820 | FLJ20674  | -4.75079828 | -1.39313157 | 0.293241574 | 0.395908666 | 0 |
| 2213    | H200002790 | FCHSD2    | -4.75047676 | -1.30322621 | 0.274335878 | 0.404478306 | 0 |
| 5260    | H200007000 | GRB14     | -4.74718198 | -1.02797040 | 0.216543288 | 0.496380583 | 0 |
| 830     | H200009977 | C19orf4   | -4.74542979 | -1.22834049 | 0.258847047 | 0.416075365 | 0 |
| 6204    | H200008466 | ZNF403    | -4.74290057 | -1.38094566 | 0.291160577 | 0.379021899 | 0 |
| 8678    | H200013299 | ZNF337    | -4.73476472 | -1.40668631 | 0.297097404 | 0.391399508 | 0 |
| 343     | H200000397 | IGHMBP2   | -4.71432842 | -1.24004465 | 0.263037392 | 0.412742409 | 0 |
| 2989    | H200003853 | LYRM1     | -4.70759257 | -1.10682513 | 0.235114894 | 0.449609335 | 0 |
| 6337    | H200008660 | TTC12     | -4.70629476 | -1.45902597 | 0.310015850 | 0.384565776 | 0 |
| 6845    | H200009835 | FLJ10159  | -4.70599591 | -1.19139489 | 0.253165305 | 0.445937170 | 0 |
| 8490    | H200012873 | IQSEC2    | -4.69991282 | -1.76299094 | 0.375111412 | 0.316478324 | 0 |
| 8325    | H200012476 | PRDM15    | -4.69243727 | -1.31653557 | 0.280565406 | 0.400951413 | 0 |
| 9955    | H200015858 | PIGB      | -4.68659330 | -1.15537443 | 0.246527564 | 0.451365067 | 0 |
| 11530   | H200020115 | C6orf192  | -4.68140873 | -1.26185277 | 0.269545524 | 0.422846836 | 0 |
| 6101    | H200008329 | UTP20     | -4.67500150 | -1.26447949 | 0.270476810 | 0.415654432 | 0 |
| 3135    | H200004045 | ASTN2     | -4.65661155 | -1.48616291 | 0.319151146 | 0.363721096 | 0 |
| 2008    | H200002515 | ACP6      | -4.65351878 | -1.27778878 | 0.274585501 | 0.420755441 | 0 |
| 7125    | H200010365 | PTHLLH    | -4.65267605 | -1.31763463 | 0.283199306 | 0.419395459 | 0 |
| 4195    | H200005623 | HOXB13    | -4.64344616 | -1.13573352 | 0.244588497 | 0.451056888 | 0 |
| 10109   | H200016366 | ZCCHC6    | -4.64176610 | -1.05888883 | 0.228121970 | 0.472732811 | 0 |
| 7422    | H200010875 | GLIPR1L1  | -4.63985316 | -1.32018166 | 0.284530915 | 0.398845391 | 0 |
| 4183    | H200005606 | TOP3B     | -4.63892716 | -1.42912567 | 0.308072452 | 0.376075021 | 0 |
| 10344   | H200016956 | RNF125    | -4.63621330 | -1.28726975 | 0.277655421 | 0.421069302 | 0 |
| 4166    | H200005572 | CLEC3B    | -4.63251126 | -1.45092974 | 0.313205874 | 0.350983515 | 0 |
| 9244    | H200014336 | GBX2      | -4.62819453 | -1.24734991 | 0.269511124 | 0.418474620 | 0 |
| 3915    | H200005180 | FLJ22531  | -4.62601353 | -1.32965575 | 0.287430148 | 0.397299632 | 0 |
| 6140    | H200008384 | SLC25A12  | -4.62510975 | -1.23448375 | 0.266909073 | 0.432076919 | 0 |
| 5776,00 | H200007865 | SSBP2     | -4.61965211 | -0.83865613 | 0.181540972 | 0.562004416 | 0 |

|       |            |                           |              |             |             |             |   |
|-------|------------|---------------------------|--------------|-------------|-------------|-------------|---|
| 6062  | H200008270 | <a href="#">PMS2</a>      | -4.61914985  | -1.26537800 | 0.273941751 | 0.413644711 | 0 |
| 10770 | H200017987 | <a href="#">NUDT5</a>     | -4.61460369  | -1.33429665 | 0.289146530 | 0.370583491 | 0 |
| 3064  | H200003954 | <a href="#">PRR8</a>      | -4.61240620  | -1.32553266 | 0.287384199 | 0.401751912 | 0 |
| 9225  | H200014308 | <a href="#">SNX24</a>     | -4.61204770  | -1.19778359 | 0.259707546 | 0.424131843 | 0 |
| 7474  | H200010979 | <a href="#">SNIP1</a>     | -4.60579708  | -1.48014883 | 0.321366489 | 0.369892126 | 0 |
| 7464  | H200010965 | <a href="#">ZBTB32</a>    | -4.60353764  | -1.34756499 | 0.292723792 | 0.409850356 | 0 |
| 1891  | H200002362 | <a href="#">SRBD1</a>     | -4.59954352  | -1.20897978 | 0.262847774 | 0.428013302 | 0 |
| 7579  | H200011146 | <a href="#">MRI1</a>      | -4.59938614  | -1.10160008 | 0.239510240 | 0.469531393 | 0 |
| 2031  | H200002539 | <a href="#">CLDN2</a>     | -4.59892755  | -1.21982962 | 0.265242192 | 0.424846678 | 0 |
| 6893  | H200009927 | <a href="#">C1orf26</a>   | -4.59806766  | -1.05028444 | 0.228418657 | 0.489108352 | 0 |
| 7587  | H200011162 | <a href="#">TULP4</a>     | -4.59786510  | -1.32170620 | 0.287460847 | 0.385661522 | 0 |
| 3761  | H200004963 | <a href="#">CCL19</a>     | -4.59235186  | -1.21522597 | 0.264619525 | 0.442431458 | 0 |
| 4771  | H200006410 | <a href="#">IVD</a>       | -4.58985334  | -1.38691508 | 0.302169803 | 0.402604278 | 0 |
| 9724  | H200015402 | <a href="#">CCDC9</a>     | -4.57981551  | -1.27538622 | 0.278479825 | 0.427057943 | 0 |
| 4340  | H200005864 | <a href="#">NCLN</a>      | -4.57781839  | -1.12900171 | 0.246624398 | 0.457889854 | 0 |
| 3970  | H200005260 | <a href="#">LRRC6</a>     | -4.57348019  | -1.25475164 | 0.274353793 | 0.393700385 | 0 |
| 7810  | H200011539 | <a href="#">CADPS2</a>    | -4.57022849  | -1.22015035 | 0.266977975 | 0.411256419 | 0 |
| 8986  | H200013918 | <a href="#">CBFA2T2</a>   | -4.56467838  | -1.38069064 | 0.302472710 | 0.382370482 | 0 |
| 10452 | H200017256 | <a href="#">ACSL1</a>     | -4.55931385  | -1.44387234 | 0.316686324 | 0.374005343 | 0 |
| 4921  | H200006590 | <a href="#">BCKDHA</a>    | -4.55234659  | -1.08903458 | 0.239224882 | 0.469500603 | 0 |
| 5903  | H200008041 | <a href="#">ZNF451</a>    | -4.53783163  | -1.52571791 | 0.336221798 | 0.340423506 | 0 |
| 2214  | H200002792 | <a href="#">LATS2</a>     | -4.53672368  | -1.15703648 | 0.255037900 | 0.443927633 | 0 |
| 3320  | H200004326 | <a href="#">GRIN2C</a>    | -4.53520657  | -1.02299074 | 0.225566514 | 0.497219696 | 0 |
| 11496 | H200020006 | <a href="#">NSFL1C</a>    | -4.53144408  | -1.26118650 | 0.278318893 | 0.405546011 | 0 |
| 2302  | H200002910 | <a href="#">C6orf60</a>   | -4.53109910  | -1.04688883 | 0.231045229 | 0.487943411 | 0 |
| 3013  | H200003887 | <a href="#">LRRC35</a>    | -4.53027488  | -1.04596226 | 0.230882736 | 0.491098936 | 0 |
| 8073  | H200011970 | <a href="#">DCLRE1B</a>   | -4.52889191  | -1.21638126 | 0.268582532 | 0.423484290 | 0 |
| 6783  | H200009656 | <a href="#">C12orf4</a>   | -4.52754115  | -1.16445274 | 0.257193187 | 0.458390509 | 0 |
| 4774  | H200006413 | <a href="#">HLA-DMB</a>   | -4.52692085  | -1.35461766 | 0.299235994 | 0.394325994 | 0 |
| 1661  | H200002029 | <a href="#">FRMD5</a>     | -4.52670369  | -1.30004454 | 0.287194530 | 0.420143059 | 0 |
| 1462  | H200001778 | <a href="#">ZNF84</a>     | -4.52218762  | -1.32215068 | 0.292369709 | 0.376033072 | 0 |
| 6571  | H200009239 | <a href="#">ZC3H12A</a>   | -4.51796860  | -1.29252120 | 0.286084591 | 0.410232973 | 0 |
| 5895  | H200008033 | <a href="#">ADCY7</a>     | -4.51450386  | -1.44902324 | 0.320970650 | 0.337531385 | 0 |
| 3947  | H200005229 | <a href="#">TNRC5</a>     | -4.51334634  | -1.09045355 | 0.241606443 | 0.462102640 | 0 |
| 7452  | H200010950 | <a href="#">NPFRR2</a>    | -4.49962288  | -1.27648226 | 0.283686499 | 0.392254874 | 0 |
| 3195  | H200004119 | <a href="#">MAP3K7IP1</a> | -4.49894185  | -1.08863509 | 0.241975808 | 0.480961251 | 0 |
| 10279 | H200016721 | <a href="#">TUBD1</a>     | -4.49827228  | -1.81441472 | 0.403358134 | 0.330556623 | 0 |
| 7025  | H200010198 | <a href="#">ZNF254</a>    | -4.48503026  | -1.60557277 | 0.357984826 | 0.332301475 | 0 |
| 11321 | H200019514 | <a href="#">C1orf58</a>   | -4.48222065  | -1.46866181 | 0.327663880 | 0.392339013 | 0 |
| 10744 | H200017929 | <a href="#">PHF20</a>     | -4.47926081  | -1.53650021 | 0.343025395 | 0.373166607 | 0 |
| 1805  | H200002232 | <a href="#">SENP5</a>     | -4.47230620  | -1.00746969 | 0.225268495 | 0.496205467 | 0 |
| 6263  | H200008549 | <a href="#">GRIK1</a>     | -4.46692243  | -1.06960097 | 0.239449192 | 0.485850325 | 0 |
| 1002  | H200001184 | <a href="#">ARL3</a>      | -4.46110049  | -1.18305905 | 0.265194440 | 0.422342514 | 0 |
| 2134  | H200002683 | <a href="#">TNFAIP8</a>   | -4.45772467  | -1.23813558 | 0.277750573 | 0.436357739 | 0 |
| 11656 | H200020475 | <a href="#">C1orf163</a>  | -4.45624435  | -1.37596460 | 0.308772250 | 0.372204503 | 0 |
| 8837  | H200013681 | <a href="#">JMJD2C</a>    | -4.45355021  | -1.44921606 | 0.325406921 | 0.394616774 | 0 |
| 763   | H200000894 | <a href="#">FAM77C</a>    | -4.45217230  | -1.13694430 | 0.255368442 | 0.459339590 | 0 |
| 8933  | H200013844 | <a href="#">CDS1</a>      | -4.44881211  | -1.14545364 | 0.257474042 | 0.464710582 | 0 |
| 516   | H200000604 | <a href="#">TPD52</a>     | -4.444373025 | -1.08621191 | 0.244436960 | 0.478624945 | 0 |
| 11217 | H200019289 | <a href="#">FBXO38</a>    | -4.44019868  | -1.43239799 | 0.322597723 | 0.360420168 | 0 |
| 624   | H200000732 | <a href="#">SMARCA3</a>   | -4.44013290  | -1.29548631 | 0.291767462 | 0.391362811 | 0 |
| 629   | H200000738 | <a href="#">KARS</a>      | -4.43047693  | -1.28118536 | 0.289175494 | 0.408690044 | 0 |
| 5920  | H200008062 | <a href="#">ARHGAP11A</a> | -4.42815861  | -1.08529701 | 0.245089913 | 0.456327354 | 0 |
| 173   | H200000204 | <a href="#">TRIM23</a>    | -4.42635371  | -1.07264028 | 0.242330448 | 0.482669474 | 0 |
| 9308  | H200014475 | <a href="#">RSRC1</a>     | -4.42495873  | -1.42263536 | 0.321502514 | 0.392548328 | 0 |
| 9968  | H200015874 | <a href="#">RHO</a>       | -4.42474527  | -1.52076665 | 0.343695865 | 0.356040237 | 0 |
| 3417  | H200004469 | <a href="#">RPL9</a>      | -4.42380645  | -1.13209188 | 0.255908998 | 0.462521490 | 0 |
| 6051  | H200008254 | <a href="#">SPATA7</a>    | -4.41082434  | -1.15491698 | 0.261836993 | 0.459171719 | 0 |
| 2622  | H200003349 | <a href="#">SLC22A6</a>   | -4.41039456  | -1.43283598 | 0.324877052 | 0.384499665 | 0 |
| 11188 | H200019176 | <a href="#">ELOF1</a>     | -4.41015219  | -1.24987467 | 0.283408512 | 0.435632533 | 0 |
| 800   | H200000942 | <a href="#">SLC12A6</a>   | -4.40746913  | -1.32712373 | 0.301107891 | 0.410671180 | 0 |
| 6925  | H200010003 | <a href="#">DBP</a>       | -4.40745682  | -1.12433713 | 0.255098842 | 0.456898257 | 0 |
| 9402  | H200014696 | <a href="#">MRM1</a>      | -4.40474758  | -1.37356602 | 0.311837625 | 0.389871368 | 0 |
| 5827  | H200007941 | <a href="#">TMOD1</a>     | -4.40020994  | -1.27106579 | 0.288864806 | 0.414569093 | 0 |
| 9519  | H200014921 | <a href="#">ZNF253</a>    | -4.39921302  | -1.80282283 | 0.409805758 | 0.324249959 | 0 |
| 10695 | H200017792 | <a href="#">CHODL</a>     | -4.39772130  | -1.03725292 | 0.235861449 | 0.499153575 | 0 |
| 4555  | H200006136 | <a href="#">CENPE</a>     | -4.39315599  | -1.34461343 | 0.306070040 | 0.416813347 | 0 |
| 2447  | H200003110 | <a href="#">SMC1A</a>     | -4.38068097  | -1.40023996 | 0.319639793 | 0.360019491 | 0 |
| 9799  | H200015558 | <a href="#">HIPK2</a>     | -4.37392853  | -1.28246508 | 0.293206684 | 0.411590494 | 0 |
| 2633  | H200003367 | <a href="#">C13orf25</a>  | -4.37263564  | -1.29353326 | 0.295824616 | 0.406198845 | 0 |
| 11813 | H200021115 | <a href="#">RFWD3</a>     | -4.36594904  | -1.33146563 | 0.304965911 | 0.381596754 | 0 |
| 8917  | H200013822 | <a href="#">UGCG</a>      | -4.36472561  | -1.37678743 | 0.315435048 | 0.375192701 | 0 |
| 5248  | H200006986 | <a href="#">CUL2</a>      | -4.35958481  | -1.02562772 | 0.235258118 | 0.490888523 | 0 |
| 8508  | H200012906 | <a href="#">AFF3</a>      | -4.34916510  | -1.11723940 | 0.256885949 | 0.463358161 | 0 |
| 9934  | H200015812 | <a href="#">SLC2A6</a>    | -4.34836667  | -1.28540592 | 0.295606607 | 0.412422330 | 0 |
| 2618  | H200003345 | <a href="#">CEECAM1</a>   | -4.34797877  | -1.59120030 | 0.365963218 | 0.314692978 | 0 |
| 9159  | H200014205 | <a href="#">PPF1A1</a>    | -4.34580892  | -1.12803108 | 0.259567574 | 0.466261045 | 0 |
| 4163  | H200005569 | <a href="#">LIPG</a>      | -4.34512790  | -1.09019228 | 0.250899929 | 0.476861654 | 0 |
| 7729  | H200011417 | <a href="#">TUT1</a>      | -4.33815088  | -1.31153752 | 0.302326396 | 0.416742542 | 0 |
| 9670  | H200015286 | <a href="#">DHDDS</a>     | -4.32816669  | -1.32362245 | 0.305815961 | 0.416172252 | 0 |
| 6366  | H200008725 | <a href="#">G6PC2</a>     | -4.32539606  | -1.13862095 | 0.263240853 | 0.464303675 | 0 |
| 7913  | H200011689 | <a href="#">REV1L</a>     | -4.32361015  | -1.06384858 | 0.246055620 | 0.461625401 | 0 |
| 11765 | H200020982 | <a href="#">C10orf86</a>  | -4.31681543  | -1.28821904 | 0.298418836 | 0.384514914 | 0 |
| 6870  | H200009884 | <a href="#">COQ3</a>      | -4.31664869  | -1.08946435 | 0.252386615 | 0.473624957 | 0 |
| 9815  | H200015584 | <a href="#">C12orf35</a>  | -4.31383372  | -1.16527378 | 0.270124872 | 0.463454228 | 0 |
| 10510 | H200017355 | <a href="#">OPTN</a>      | -4.31001685  | -1.22361454 | 0.283900175 | 0.444944283 | 0 |
| 2644  | H200003384 | <a href="#">LRIG2</a>     | -4.30311956  | -1.09303169 | 0.254009138 | 0.457270549 | 0 |
| 10019 | H200016173 | <a href="#">ATP6V1G2</a>  | -4.29913905  | -1.08837838 | 0.253161940 | 0.475792404 | 0 |
| 658   | H200000776 | <a href="#">ASB6</a>      | -4.29267719  | -1.03204817 | 0.240420635 | 0.489314185 | 0 |
| 5511  | H200007378 | <a href="#">VPS13B</a>    | -4.29186600  | -1.23312082 | 0.287315777 | 0.400561018 | 0 |
| 8445  | H200012760 | <a href="#">SNX16</a>     | -4.29148190  | -1.21801773 | 0.283822176 | 0.405250002 | 0 |



|       |            |                           |             |             |             |             |   |
|-------|------------|---------------------------|-------------|-------------|-------------|-------------|---|
| 1275  | H200001530 | <a href="#">BTBD3</a>     | -4.28859910 | -1.28287240 | 0.299135538 | 0.390830165 | 0 |
| 5535  | H200007438 | <a href="#">GPR180</a>    | -4.28292216 | -1.04309685 | 0.243547934 | 0.484470536 | 0 |
| 10005 | H200016139 | <a href="#">CXorf56</a>   | -4.28206890 | -1.39178717 | 0.325026805 | 0.407909530 | 0 |
| 6458  | H200008893 | <a href="#">WDR55</a>     | -4.28034601 | -1.07948128 | 0.252194865 | 0.466600168 | 0 |
| 1035  | H200001226 | <a href="#">SYN2</a>      | -4.27600038 | -1.23129312 | 0.287954399 | 0.404302805 | 0 |
| 6288  | H200008590 | <a href="#">HIST1H2BM</a> | -4.27413286 | -1.28079999 | 0.299663119 | 0.428793854 | 0 |
| 9364  | H200014631 | <a href="#">TERF1</a>     | -4.26945152 | -1.25029590 | 0.292846960 | 0.441833412 | 0 |
| 2109  | H200002646 | <a href="#">NFU1</a>      | -4.26888668 | -1.23497110 | 0.289309380 | 0.447040252 | 0 |
| 11084 | H200019018 | <a href="#">PKX</a>       | -4.26859968 | -1.13249468 | 0.265308244 | 0.449016746 | 0 |
| 7299  | H200010628 | <a href="#">OMD</a>       | -4.26824392 | -1.22194658 | 0.286287897 | 0.429772458 | 0 |
| 8619  | H200013147 | <a href="#">ASAM</a>      | -4.26039252 | -1.11595920 | 0.261938117 | 0.475970393 | 0 |
| 10504 | H200017346 | <a href="#">BCOR</a>      | -4.25803153 | -1.05298841 | 0.247294647 | 0.493761208 | 0 |
| 6718  | H200009533 | <a href="#">WDR85</a>     | -4.25659088 | -1.39199653 | 0.327021451 | 0.368144560 | 0 |
| 8781  | H200013557 | <a href="#">CHEK2</a>     | -4.25614577 | -1.22472061 | 0.287753446 | 0.442577228 | 0 |
| 6556  | H200009222 | <a href="#">FRAS1</a>     | -4.25420516 | -1.13869447 | 0.267663272 | 0.466086423 | 0 |
| 9568  | H200015057 | <a href="#">RXFP1</a>     | -4.24185712 | -1.12987019 | 0.266362153 | 0.465147940 | 0 |
| 6088  | H200008312 | <a href="#">TSR2</a>      | -4.24056437 | -1.28559031 | 0.303164910 | 0.420661687 | 0 |
| 11331 | H200019543 | <a href="#">RAXL1</a>     | -4.23173067 | -1.11354659 | 0.263142122 | 0.474554249 | 0 |
| 9849  | H200015636 | <a href="#">SFRS1</a>     | -4.23110805 | -1.37284880 | 0.324465550 | 0.410706635 | 0 |
| 3398  | H200004444 | <a href="#">CLDN15</a>    | -4.23059985 | -1.48848128 | 0.351836933 | 0.344379234 | 0 |
| 11602 | H200020367 | <a href="#">FAM48A</a>    | -4.22711248 | -1.31816203 | 0.311835098 | 0.419100920 | 0 |
| 4850  | H200006509 | <a href="#">COL18A1</a>   | -4.22584617 | -1.14275378 | 0.270420109 | 0.470562406 | 0 |
| 9976  | H200015945 | <a href="#">TFAP2D</a>    | -4.22538524 | -1.02134178 | 0.241715659 | 0.489689525 | 0 |
| 6264  | H200008552 | <a href="#">CC2D1A</a>    | -4.21048608 | -1.11844103 | 0.265632284 | 0.469412830 | 0 |
| 7115  | H200010346 | <a href="#">SELE</a>      | -4.20375536 | -1.35210895 | 0.321643111 | 0.402049753 | 0 |
| 9989  | H200016056 | <a href="#">CHRNG</a>     | -4.19977132 | -1.05901366 | 0.252159839 | 0.487795119 | 0 |
| 5078  | H200006775 | <a href="#">TCEA2</a>     | -4.19591550 | -1.15292591 | 0.274773387 | 0.447771621 | 0 |
| 9818  | H200015587 | <a href="#">C1orf69</a>   | -4.19496386 | -1.42044556 | 0.338607342 | 0.370895925 | 0 |
| 5012  | H200006692 | <a href="#">MFG</a>       | -4.19443958 | -1.19270180 | 0.284353076 | 0.447856649 | 0 |
| 6552  | H200009213 | <a href="#">FUSIP1</a>    | -4.19433631 | -1.17252187 | 0.279548845 | 0.465284250 | 0 |
| 3129  | H200004039 | <a href="#">HRBL</a>      | -4.19419096 | -1.28259851 | 0.305803557 | 0.427413279 | 0 |
| 5197  | H200006923 | <a href="#">RGS3</a>      | -4.18772790 | -1.35845151 | 0.324388676 | 0.399409516 | 0 |
| 502   | H200000588 | <a href="#">CHRNA2</a>    | -4.18298145 | -1.05756812 | 0.252826394 | 0.467045489 | 0 |
| 5258  | H200006998 | <a href="#">PEX11B</a>    | -4.17665820 | -1.29922092 | 0.311067091 | 0.431337524 | 0 |
| 5330  | H200007083 | <a href="#">ANKHD1</a>    | -4.17584450 | -1.29568195 | 0.310280219 | 0.410613697 | 0 |
| 11151 | H200019114 | <a href="#">SMA5</a>      | -4.17536582 | -1.27120816 | 0.304454321 | 0.423206164 | 0 |
| 116   | H200000134 | <a href="#">NR2C2</a>     | -4.17301986 | -1.39528691 | 0.334359040 | 0.351307648 | 0 |
| 5963  | H200008111 | <a href="#">SLC24A1</a>   | -4.17202170 | -1.15826682 | 0.277627227 | 0.448381433 | 0 |
| 5474  | H200007302 | <a href="#">PKNOX1</a>    | -4.16281249 | -1.04897321 | 0.251986658 | 0.495684618 | 0 |
| 2288  | H200002891 | <a href="#">KBTBD2</a>    | -4.14457961 | -1.12342549 | 0.271058972 | 0.464935115 | 0 |
| 10223 | H200016601 | <a href="#">RNUXA</a>     | -4.14288111 | -1.04610523 | 0.252506699 | 0.480011213 | 0 |
| 3030  | H200003908 | <a href="#">ZNF584</a>    | -4.12626138 | -1.15062285 | 0.278853602 | 0.468216065 | 0 |
| 8893  | H200013778 | <a href="#">CRY1</a>      | -4.12603451 | -1.12709746 | 0.273167241 | 0.474897639 | 0 |
| 3113  | H200004020 | <a href="#">MVP</a>       | -4.12170933 | -1.24251783 | 0.301456926 | 0.444827147 | 0 |
| 10812 | H200018145 | <a href="#">FKBP9L</a>    | -4.11864903 | -1.21633186 | 0.295323018 | 0.435517909 | 0 |
| 8780  | H200013556 | <a href="#">VPS36</a>     | -4.11704090 | -1.42222281 | 0.345447823 | 0.385968014 | 0 |
| 22    | H200000021 | <a href="#">AZGP1</a>     | -4.11632010 | -1.33455690 | 0.324211157 | 0.422727593 | 0 |
| 8949  | H200013866 | <a href="#">DOM3Z</a>     | -4.11238063 | -1.35540885 | 0.329592265 | 0.419672097 | 0 |
| 2585  | H200003294 | <a href="#">KIAA1468</a>  | -4.11224127 | -1.19863680 | 0.291480173 | 0.429617641 | 0 |
| 6561  | H200009228 | <a href="#">TROVE2</a>    | -4.10990932 | -1.09263083 | 0.265852782 | 0.471848885 | 0 |
| 5919  | H200008061 | <a href="#">DLX4</a>      | -4.09823945 | -1.40522607 | 0.342885301 | 0.360720217 | 0 |
| 7513  | H200011026 | <a href="#">KRT10</a>     | -4.09752564 | -1.61661186 | 0.394533677 | 0.350566697 | 0 |
| 4877  | H200006542 | <a href="#">NSMAF</a>     | -4.09495048 | -1.03649385 | 0.253115112 | 0.495332546 | 0 |



|       |            |                           |              |             |             |             |   |
|-------|------------|---------------------------|--------------|-------------|-------------|-------------|---|
| 1175  | H200019157 | <a href="#">LOC284701</a> | -4.09148970  | -1.10713582 | 0.270594797 | 0.463920226 | 0 |
| 1221  | H200001466 | <a href="#">HIST1H1C</a>  | -4.09110120  | -1.17621993 | 0.287506925 | 0.420389684 | 0 |
| 6058  | H200008266 | <a href="#">DUSP10</a>    | -4.09049905  | -1.41214725 | 0.345226154 | 0.390919233 | 0 |
| 7961  | H200011755 | <a href="#">CAMK2D</a>    | -4.08597246  | -1.21032307 | 0.296214202 | 0.419584081 | 0 |
| 6214  | H200008481 | <a href="#">NCAPH2</a>    | -4.08582150  | -1.05909158 | 0.259211416 | 0.488418598 | 0 |
| 3380  | H200004416 | <a href="#">ZNF77</a>     | -4.08482951  | -1.15486511 | 0.282720518 | 0.442486171 | 0 |
| 8573  | H200013039 | <a href="#">C1orf97</a>   | -4.07804978  | -1.38055717 | 0.338533674 | 0.410045428 | 0 |
| 5723  | H200007783 | <a href="#">C12orf32</a>  | -4.07674371  | -1.17188754 | 0.287456760 | 0.461940559 | 0 |
| 5331  | H200007084 | <a href="#">BCL2L11</a>   | -4.07658622  | -1.10093271 | 0.270062412 | 0.463361192 | 0 |
| 9334  | H200014548 | <a href="#">BIN1</a>      | -4.07277193  | -1.09014289 | 0.267666079 | 0.481523290 | 0 |
| 650   | H200000766 | <a href="#">PSEN1</a>     | -4.07060240  | -1.13878288 | 0.279757825 | 0.474743544 | 0 |
| 6663  | H200009430 | <a href="#">MLL3</a>      | -4.07048543  | -1.34212894 | 0.329722084 | 0.374739411 | 0 |
| 1081  | H200001284 | <a href="#">JMJD1C</a>    | -4.06699338  | -1.21986575 | 0.299942891 | 0.441315553 | 0 |
| 3062  | H200003948 | <a href="#">PLEKHF2</a>   | -4.06692100  | -1.35480899 | 0.333128919 | 0.359685726 | 0 |
| 8750  | H200013467 | <a href="#">SH3RF2</a>    | -4.06328118  | -1.17033175 | 0.288026278 | 0.442190950 | 0 |
| 7327  | H200010674 | <a href="#">C10orf35</a>  | -4.06244858  | -1.31987761 | 0.324897063 | 0.420603735 | 0 |
| 8680  | H200013305 | <a href="#">ABCC4</a>     | -4.06193984  | -1.27147356 | 0.313021269 | 0.380998010 | 0 |
| 598   | H200000703 | <a href="#">PRM1</a>      | -4.06015485  | -1.31258545 | 0.323284579 | 0.407429629 | 0 |
| 7243  | H200010539 | <a href="#">LOC144438</a> | -4.05848521  | -1.18118606 | 0.291041114 | 0.417615150 | 0 |
| 420   | H200000484 | <a href="#">POMC</a>      | -4.05776992  | -1.46454098 | 0.360922627 | 0.390905399 | 0 |
| 9848  | H200015635 | <a href="#">NADSYN1</a>   | -4.056654725 | -1.41080090 | 0.347783673 | 0.406115107 | 0 |
| 7751  | H200011453 | <a href="#">NDUFAF1</a>   | -4.04531802  | -1.17442744 | 0.290317704 | 0.456013342 | 0 |
| 7372  | H200010746 | <a href="#">RHOF</a>      | -4.04011654  | -1.07386630 | 0.265800823 | 0.475680268 | 0 |
| 2047  | H200002559 | <a href="#">TYW1</a>      | -4.03497072  | -1.14308379 | 0.283294166 | 0.461620401 | 0 |
| 209   | H200000247 | <a href="#">PRTN3</a>     | -4.02886939  | -1.31819378 | 0.327187023 | 0.388733238 | 0 |
| 7998  | H200011810 | <a href="#">ARRB1</a>     | -4.02639621  | -1.28988587 | 0.320357411 | 0.408939179 | 0 |
| 3573  | H200004690 | <a href="#">RAB17</a>     | -4.02608204  | -1.14729046 | 0.284964502 | 0.469407698 | 0 |
| 2717  | H200003482 | <a href="#">WDR51B</a>    | -4.02525169  | -1.10507432 | 0.274535459 | 0.480264152 | 0 |
| 3455  | H200004521 | <a href="#">C16orf14</a>  | -4.02365835  | -1.08767701 | 0.270320420 | 0.461677187 | 0 |
| 8028  | H200011879 | <a href="#">GRIN2D</a>    | -4.02194693  | -1.03933261 | 0.258415298 | 0.497523400 | 0 |
| 7624  | H200011220 | <a href="#">LSM2</a>      | -4.02070323  | -1.09977258 | 0.273527421 | 0.449572575 | 0 |
| 9303  | H200014464 | <a href="#">TIMP4</a>     | -4.02037874  | -1.18051752 | 0.293633410 | 0.438917147 | 0 |
| 2898  | H200003727 | <a href="#">C14orf101</a> | -4.01250537  | -0.99826225 | 0.248787766 | 0.484809406 | 0 |
| 8048  | H200011922 | <a href="#">COPS7B</a>    | -4.01168557  | -1.10019744 | 0.274248172 | 0.477375686 | 0 |
| 4533  | H200006104 | <a href="#">HSD17B4</a>   | -4.00887038  | -1.28934728 | 0.321623590 | 0.435075015 | 0 |
| 8082  | H200011985 | <a href="#">MANBA</a>     | -4.00748979  | -1.13556577 | 0.283360864 | 0.473151427 | 0 |
| 4076  | H200005446 | <a href="#">CBARA1</a>    | -4.00234306  | -1.40189546 | 0.350268691 | 0.400139495 | 0 |
| 11336 | H200019567 | <a href="#">C7orf27</a>   | -3.99936694  | -1.35702304 | 0.339309462 | 0.348771382 | 0 |
| 7528  | H200011049 | <a href="#">PPOX</a>      | -3.99385428  | -1.07604382 | 0.269424907 | 0.461513058 | 0 |
| 2294  | H200002898 | <a href="#">IFIT1</a>     | -3.98840712  | -1.18156401 | 0.296249598 | 0.443708487 | 0 |
| 2531  | H200003215 | <a href="#">NKIRAS2</a>   | -3.98833141  | -1.21176202 | 0.303826814 | 0.414172369 | 0 |
| 5889  | H200008025 | <a href="#">PYGO2</a>     | -3.98457336  | -1.04051611 | 0.261136141 | 0.499639261 | 0 |
| 11789 | H200021047 | <a href="#">DPH4</a>      | -3.97800593  | -1.08520712 | 0.272801786 | 0.460481346 | 0 |
| 7628  | H200011231 | <a href="#">RAB31P</a>    | -3.97614802  | -1.16363451 | 0.292653721 | 0.466108723 | 0 |
| 7653  | H200011280 | <a href="#">IGH31</a>     | -3.97601092  | -1.01182712 | 0.254482984 | 0.496642849 | 0 |
| 6918  | H200009985 | <a href="#">MLLT10</a>    | -3.97321427  | -1.25096471 | 0.314849547 | 0.425088630 | 0 |
| 11516 | H200020092 | <a href="#">CCDC128</a>   | -3.97241023  | -1.13145501 | 0.284828341 | 0.452433341 | 0 |
| 6124  | H200008359 | <a href="#">TAPBP</a>     | -3.97171742  | -1.21856020 | 0.306809391 | 0.434543183 | 0 |
| 1276  | H200001531 | <a href="#">BAIAP2</a>    | -3.97091159  | -1.37418659 | 0.346063255 | 0.366602820 | 0 |
| 3986  | H200005291 | <a href="#">FARS2</a>     | -3.96793287  | -1.15811313 | 0.291868126 | 0.466839561 | 0 |
| 6562  | H200009229 | <a href="#">CTSH</a>      | -3.96692711  | -1.14914181 | 0.289680595 | 0.470034167 | 0 |
| 9122  | H200014125 | <a href="#">ZNF609</a>    | -3.95568908  | -1.00449143 | 0.253935892 | 0.483755332 | 0 |
| 11391 | H200019706 | <a href="#">SLC7A6</a>    | -3.94939309  | -1.34162823 | 0.339704911 | 0.421947297 | 0 |
| 5408  | H200007184 | <a href="#">PRRX2</a>     | -3.94585725  | -1.28820176 | 0.326469427 | 0.441006208 | 0 |
| 4492  | H200006054 | <a href="#">ST3GAL4</a>   | -3.94105130  | -1.21338609 | 0.307883861 | 0.445787693 | 0 |
| 2908  | H200003742 | <a href="#">GFEER</a>     | -3.94014956  | -1.13670013 | 0.288491621 | 0.469870359 | 0 |
| 10646 | H200017630 | <a href="#">PLTP</a>      | -3.93602683  | -1.29324648 | 0.328566479 | 0.424437307 | 0 |
| 6872  | H200009888 | <a href="#">DPYSL5</a>    | -3.92983345  | -1.44109299 | 0.366705869 | 0.332387461 | 0 |
| 8438  | H200012731 | <a href="#">F2R</a>       | -3.51949658  | -0.95474520 | 0.271273228 | 0.530827206 | 0 |
| 7340  | H200010693 | <a href="#">NFRKB</a>     | -3.14367371  | -0.91555635 | 0.291237715 | 0.508280505 | 0 |

Significant: 1794

Median number of false positives: 0

False Discovery Rate (%): 0

SAM Plotsheet

Tail strength (%): 85

se (%): 56.4

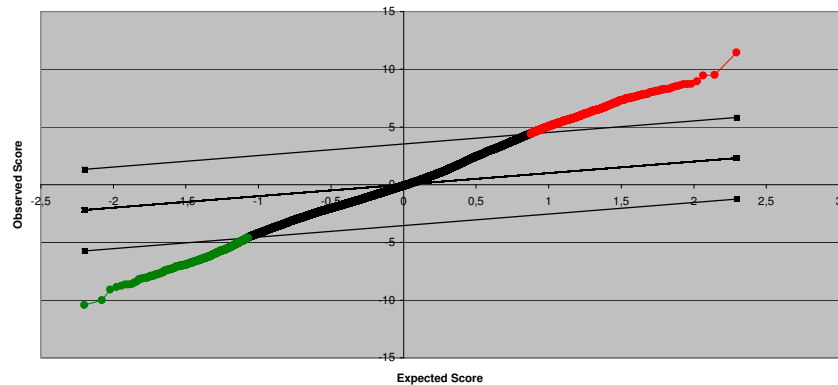

Supplement: 1476-4598-6-53-S1.pdf [file 1476-4598-6-53-S1.pdf]
